# Supplementary material for: Methylglyoxal-derived hydroimidazolone, MG-H1, increases food intake by altering tyramine signaling via the GATA transcription factor ELT-3 in Caenorhabditis elegans
Source: eLife. 2023 Sep 20;12:e82446. doi: 10.7554/eLife.82446 (PMC10611433; doi:10.7554/eLife.82446)
Supplement: Supplementary file 1. [file elife-82446-supp1.xlsx]

## Sheet: gene_exp
gene	locus	glod-4 basemean	N2 basemean	Log2 fold change	p_value	q_value	significant
nlp-40	I:11498-16831	225.624	278.118	-0.301774	0.01675	0.050998	no
Y74C9A.1	I:43732-44677	0.393899	0.506117	-0.361645	1	1	no
Y48G1C.12	I:47471-49416	49.0708	53.4388	-0.123023	0.48235	0.636347	no
Y48G1C.4	I:49918-54360	40.2126	54.4038	-0.436059	0.0027	0.0116311	yes
csk-1	I:71857-81071	35.2355	38.3478	-0.122111	0.3519	0.512033	no
Y48G1C.10	I:82056-84959	6.24932	6.00997	0.0563418	0.8407	0.902994	no
Y48G1C.11	I:86840-90607	17.662	16.9726	0.057444	0.77785	0.860746	no
Y48G1C.9	I:91403-92877	75.0389	77.9374	-0.0546769	0.75095	0.843252	no
Y48G1C.1	I:93030-94881	35.4929	36.4405	-0.0380145	0.7909	0.869436	no
F53G12.9,rpl-7	I:111035-112915	3323.5	3422.34	-0.042283	0.84	0.902673	no
F53G12.12	I:111035-112915	0	17.6421	#VALUE!	1	1	no
F53G12.13	I:113313-113661	9.5352	19.2987	-1.01716	0.03345	0.0876733	no
F53G12.8	I:113806-114681	10.7639	4.51352	1.25388	0.0005	0.00282734	yes
col-45	I:115738-117438	0.382218	0.329054	0.216068	1	1	no
spe-8	I:118108-120870	1.9668	0.55374	1.82857	5e-05	0.000377672	yes
mex-3	I:127296-134263	298.645	267.675	0.157952	0.2365	0.385306	no
F53G12.4	I:134336-137282	1.14244	2.40073	-1.07135	0.00395	0.0158092	yes
F53G12.3	I:137844-144565	0.0391243	0.0383267	0.0297155	1	1	no
carboxylesterases	I:173411-175988	5.28629	6.08359	-0.202666	0.40935	0.568566	no
F56C11.5	I:178537-182771	66.5592	75.5057	-0.181948	0.28425	0.439804	no
F56C11.4	I:183363-184210	1.89916	2.6827	-0.498322	0.1899	0.327936	no
K10E9.1	I:189653-202489	3.77236	5.59768	-0.569363	0.00385	0.0154854	yes
atm-1	I:203036-208397	15.1169	17.765	-0.232868	0.1478	0.272683	no
Y48G1BL.7	I:209319-211719	0.937432	0.855714	0.131585	0.76775	0.854109	no
Y48G1BL.1	I:216004-219099	2.80679	2.98125	-0.0870006	0.8078	0.880592	no
Y48G1BM.1	I:252117-254129	1.23258	1.34997	-0.131245	0.7151	0.817913	no
C53D5.3	I:280119-280445	2.81503	4.2666	-0.599934	0.4729	0.628074	no
C53D5.2	I:283499-286115	4.12533	6.03788	-0.549532	0.0669	0.150009	no
C53D5.1	I:291215-305461	24.6267	18.0559	0.447752	0.00615	0.0226441	yes
Y48G1A.4	I:323860-330979	17.3293	22.9498	-0.405268	0.006	0.0222032	yes
Y48G1A.3	I:332613-337816	37.0758	36.6741	0.0157176	0.9208	0.953535	no
Y48G1A.2	I:343117-348367	150.983	173.465	-0.200261	0.24585	0.3961	no
Y48G1A.1	I:348537-357136	6.8098	9.78548	-0.52303	0.0049	0.0188149	yes
rnp-8	I:364521-371636	70.5784	81.9716	-0.215897	0.111	0.219817	no
taf-4	I:382835-394414	35.3284	34.0928	0.0513608	0.7409	0.836314	no
Y50C1A.1	I:398893-412513	22.1748	21.5455	0.0415318	0.7835	0.864687	no
C07F11.2	I:420924-423657	1.02663	0.777972	0.400121	0.31	0.46868	no
tol-1	I:444001-461608	22.3921	22.0945	0.0192971	0.8847	0.930969	no
W04C9.4	I:461997-462655	152.667	159.429	-0.0625228	0.64905	0.771282	no
cutl-13	I:477614-481957	0.158944	0.835549	-2.39421	0.0001	0.000701046	yes
W04C9.2	I:488618-489908	330.079	340.912	-0.0465871	0.7239	0.824677	no
haf-4	I:489986-496153	16.8361	18.5801	-0.142196	0.3485	0.508767	no
deps-1	I:506479-510840	138.304	127.92	0.112601	0.36375	0.522977	no
Y65B4BL.1	I:530568-532855	14.3207	3.49902	2.03308	5e-05	0.000377672	yes
Y65B4BR.8	I:534460-535347	115.602	132.533	-0.197178	0.15505	0.282641	no
Y65B4BR.5	I:535791-536673	1387.16	1241.12	0.160495	0.2834	0.43893	no
wwp-1	I:537124-542200	114.334	98.522	0.214736	0.08985	0.187525	no
ptr-21	I:550710-556641	14.7471	15.3252	-0.055474	0.7084	0.813575	no
lpr-1	I:557433-561566	6.68066	2.12793	1.65054	5e-05	0.000377672	yes
phospholipase	I:562738-565184	2.28862	2.65101	-0.212064	0.51725	0.664524	no
sago-2	I:614725-629447	0.271497	0.189981	0.515077	1	1	no
Y65B4A.4	I:614725-629447	1.64948	0.808834	1.02809	0.44355	0.601325	no
Y65B4A.3	I:636849-637855	137.088	188.294	-0.457891	0.00055	0.00307621	yes
Y65B4A.2	I:645453-653978	7.07228	7.8155	-0.144162	0.551	0.692927	no
Y65B4A.1	I:654098-658692	50.5338	65.0444	-0.364177	0.00645	0.0235071	yes
Y18H1A.11	I:680416-683475	3.98478	5.60956	-0.493387	0.09575	0.196381	no
Y18H1A.1	I:688281-691270	3.37199	1.05976	1.66987	5e-05	0.000377672	yes
pif-1	I:720013-731077	28.3591	27.981	0.0193641	0.88595	0.931723	no
col-47	I:745754-747504	1.73547	0.0232295	6.22323	0.0522	0.123841	no
Y18H1A.8	I:758757-760431	3.92098	0.84828	2.2086	0.00745	0.0263538	yes
carboxypeptidase	I:763626-770707	4.46805	1.4107	1.66323	5e-05	0.000377672	yes
carboxypeptidase	I:770893-776356	4.79034	1.23088	1.96044	5e-05	0.000377672	yes
ZC123.3	I:803369-835286	5.32404	4.72887	0.171027	0.31785	0.478156	no
ZC123.1	I:837997-841749	6.62169	1.60384	2.04567	5e-05	0.000377672	yes
Y95B8A.8	I:853460-854133	14.0896	18.499	-0.392808	0.18765	0.325253	no
Y95B8A.7	I:858488-871831	28.7913	32.7001	-0.183661	0.2	0.341096	no
Y95B8A.6	I:882919-889870	6.75098	11.8086	-0.80667	0.00355	0.0145175	yes
gpa-16	I:897287-905906	26.4202	30.2719	-0.196339	0.2763	0.43114	no
Y95B8A.4	I:907466-911135	3.6238	2.08986	0.794098	0.0223	0.0638107	no
Y95B8A.2	I:938484-941775	8.25943	8.49683	-0.0408827	0.8845	0.930833	no
nas-30	I:942413-947678	1.01453	0.54175	0.905117	0.01875	0.0558405	no
F54A5.1	I:989672-992180	9.02003	6.34388	0.507766	0.0264	0.073165	no
C54G6.3	I:996046-997110	0.509735	0.298301	0.77298	1	1	no
C54G6.2	I:1003890-1010767	0.522733	0.407236	0.360209	0.3608	0.520023	no
spp-17	I:1016406-1017182	1657.66	1310.55	0.338972	0.00745	0.0263538	yes
spp-23	I:1018836-1019221	88.1238	33.8614	1.37989	5e-05	0.000377672	yes
Y34D9A.3	I:1034473-1040870	34.3696	39.8743	-0.214324	0.1112	0.220129	no
Y34D9A.7	I:1041485-1048188	16.6629	21.4282	-0.362874	0.04655	0.113531	no
glrx-10	I:1049595-1050714	188.629	148.689	0.343247	0.03595	0.0926654	no
Y34D9A.2	I:1053922-1066901	3.07949	2.40344	0.357588	0.68405	0.797377	no
gsa-1	I:1068592-1075012	6.4996	6.79625	-0.0643885	0.76225	0.850384	no
R06A10.1	I:1085969-1088453	3.92669	2.43867	0.687217	0.10165	0.205527	no
R06A10.5	I:1089126-1095798	13.7921	10.6383	0.37457	0.84255	0.90435	no
ZK993.2	I:1107583-1115503	0.190881	0.167371	0.189628	1	1	no
ceh-45	I:1128325-1131739	2.06031	1.97038	0.0643863	0.86365	0.917096	no
rpl-17	I:1156578-1157464	3604.83	3606.75	-0.000770851	0.997	0.997907	no
Y48G8AL.7	I:1157570-1162877	50.1266	75.0861	-0.582969	0.00075	0.00400858	yes
smg-2	I:1176474-1189653	13.8849	15.5224	-0.160833	0.27155	0.426058	no
Y48G8AL.5	I:1193159-1207867	33.6931	51.2546	-0.605226	5e-05	0.000377672	yes
Y48G8AL.1	I:1211493-1254666	23.1605	26.3	-0.183397	0.3996	0.558042	no
Y48G8AL.15	I:1254770-1258228	27.6163	35.7428	-0.372131	0.1071	0.213881	no
Y48G8AR.2	I:1282101-1285436	2.83334	1.38017	1.03766	0.00215	0.00957773	yes
Y48G8AR.3	I:1287304-1287835	0.152735	0.149958	0.0264673	1	1	no
dapk-1	I:1305575-1328229	6.38386	4.74887	0.426845	0.0157	0.0483552	yes
K12C11.5	I:1333029-1334074	1.19661	0.347986	1.78185	0.0207	0.0602278	no
K12C11.3	I:1335395-1336757	3.48452	6.55973	-0.912674	0.0164	0.0501404	no
K12C11.6	I:1337020-1338121	16.2893	50.6174	-1.63571	5e-05	0.000377672	yes
K12C11.7	I:1338807-1339711	10.9966	27.1326	-1.30297	5e-05	0.000377672	yes
smo-1	I:1340678-1344695	1076.84	915.639	0.233959	0.11315	0.223157	no
Y92H12BL.1	I:1348503-1359596	8.13983	6.36258	0.355387	0.12505	0.240441	no
Y92H12BL.5	I:1365309-1375691	19.005	29.3905	-0.628969	0.0097	0.0325779	yes
Y92H12BL.2	I:1376942-1385058	0	0	0	1	1	no
Y92H12BR.7	I:1394569-1402943	10.7378	11.3276	-0.0771318	0.691	0.802015	no
set-29	I:1405944-1413072	21.7884	19.1673	0.184913	0.32265	0.483254	no
Y92H12BR.3	I:1416591-1425131	85.2875	81.6018	0.0637348	0.64475	0.767652	no
Y92H12BR.8	I:1436279-1441315	62.0459	68.3384	-0.139361	0.3235	0.484291	no
spe-15	I:1446666-1465341	7.43626	4.10774	0.856232	0.00015	0.00100493	yes
F47G6.3	I:1465632-1469537	1.80923	0.613434	1.56039	0.0013	0.00635523	yes
F47G6.2	I:1471297-1479921	4.27784	3.4769	0.29908	0.2499	0.400698	no
dyb-1	I:1483083-1490474	5.63739	5.91138	-0.0684667	0.76765	0.854059	no
Y92H12A.4	I:1514762-1527350	6.51248	8.33625	-0.356192	0.08825	0.185063	no
Y92H12A.3	I:1529889-1534237	18.4116	18.8119	-0.0310341	0.89405	0.93647	no
Y92H12A.2	I:1543525-1556184	13.341	11.6606	0.194219	0.2413	0.391265	no
src-1	I:1566931-1580204	35.5235	32.6471	0.121819	0.35585	0.515735	no
Y73E7A.3	I:1586167-1593661	7.17669	5.21449	0.460793	0.06315	0.143205	no
Y73E7A.2	I:1601840-1606846	19.7103	33.3089	-0.756956	5e-05	0.000377672	yes
adpr-1	I:1610390-1619944	7.36521	12.0582	-0.711212	0.00185	0.00846397	yes
Y73E7A.1	I:1629003-1633494	100.004	121.567	-0.281697	0.03885	0.0984605	no
Y73E7A.8	I:1634740-1644103	3.967	0.9143	2.11731	5e-05	0.000377672	yes
Y71G12B.18	I:1652916-1655337	0.275894	0.0860698	1.68053	1	1	no
Y71G12B.17	I:1667501-1669765	10.4491	2.61164	2.00035	5e-05	0.000377672	yes
Y71G12B.16	I:1681813-1685064	3.23171	2.84476	0.18399	0.56105	0.701102	no
ubc-3	I:1698094-1701129	129.53	123.516	0.0685848	0.58645	0.721947	no
lsm-6	I:1701358-1701739	274.742	251.173	0.129399	0.4626	0.619198	no
Y71G12B.13	I:1702123-1707891	26.9468	25.8007	0.0627005	0.6965	0.805794	no
atg-5	I:1709587-1715569	42.1336	49.2639	-0.225559	0.1419	0.264554	no
Y71G12B.11	I:1721592-1751056	13.5394	11.6554	0.216163	0.2204	0.365688	no
Y71G12B.29	I:1721592-1751056	0	0	0	1	1	no
Y71G12B.10	I:1751481-1754405	73.559	82.8904	-0.172303	0.2148	0.359806	no
lin-65	I:1755329-1766401	26.0311	25.1622	0.0489758	0.7302	0.828659	no
Y71G12B.8	I:1767887-1790156	33.3419	36.2882	-0.122164	0.3894	0.548019	no
Y71G12B.7	I:1792455-1792899	0	0.260322	#VALUE!	1	1	no
Y71G12B.6	I:1793252-1796426	32.2419	19.9346	0.693665	0.0003	0.00181567	yes
Y71G12B.5	I:1799717-1806987	0.256633	0.218257	0.233678	1	1	no
Y71G12B.4	I:1808091-1811782	52.4913	63.6981	-0.279173	0.0511	0.121832	no
Y71G12B.3	I:1812955-1813538	4.60239	1.57978	1.54266	0.00115	0.00574776	yes
Y71G12B.2	I:1816150-1818497	0.193908	0.569999	-1.55559	0.0277	0.0758268	no
Y71G12B.1	I:1823447-1825967	74.5722	88.1485	-0.241298	0.0604	0.138498	no
Y71G12B.28	I:1829770-1832063	0.479225	0.458161	0.064849	1	1	no
C53H9.2	I:1832897-1834765	162.361	151.03	0.104368	0.3996	0.558042	no
rpl-27	I:1834881-1835440	4767.64	4539.64	0.0706966	0.66725	0.785399	no
egl-30	I:1835679-1841192	87.6924	66.2418	0.40471	0.0015	0.00714924	yes
emr-1	I:1842445-1843228	188.926	191.638	-0.0205618	0.878	0.926397	no
nlp-12	I:1843400-1843835	54.1133	82.967	-0.616553	0.0241	0.0678401	no
tag-96	I:1845221-1850452	6.37814	6.73914	-0.079429	0.7588	0.848373	no
tub-2	I:1874147-1883473	12.8944	12.1249	0.0887735	0.58285	0.718836	no
Y71G12A.2	I:1895161-1904607	7.22723	7.06972	0.0317886	0.8988	0.939339	no
Y51F10.6	I:1917045-1919352	21.4361	19.8569	0.110403	0.6385	0.762331	no
hex-4	I:1924300-1932261	44.6691	51.0368	-0.192261	0.16015	0.289201	no
Y51F10.4	I:1932352-1945208	36.1782	35.8062	0.0149102	0.9196	0.953049	no
Y51F10.11	I:1961666-1964974	16.1714	14.8562	0.122381	0.6543	0.775547	no
Y51F10.3	I:1967819-1973884	37.3206	40.9848	-0.135118	0.3746	0.534167	no
Y51F10.2	I:1978005-1983438	314.146	313.61	0.00246312	0.986	0.992181	no
Y20F4.2	I:2026317-2033950	7.56144	10.2049	-0.432534	0.0239	0.067425	no
rpb-10	I:2064294-2064690	284.323	252.889	0.169029	0.2792	0.434346	no
Y37E3.4	I:2064977-2065483	285.739	229.467	0.31641	0.0239	0.067425	no
arl-13	I:2065750-2069051	1.7601	3.35339	-0.929965	0.00545	0.0205378	yes
phb-1	I:2071353-2072551	400.385	354.126	0.177123	0.1622	0.291672	no
Y37E3.10	I:2072678-2076908	109.944	77.3562	0.507174	0.0001	0.000701046	yes
Y37E3.11	I:2078960-2085648	68.1516	69.5633	-0.0295805	0.82305	0.891601	no
Y37E3.20	I:2078960-2085648	40.53	0	#NAME?	1	1	no
npp-13	I:2097347-2123429	46.0445	45.6848	0.0113146	0.9358	0.962253	no
Y37E3.17	I:2128591-2145973	63.0413	86.1674	-0.450845	0.00035	0.00207829	yes
afd-1	I:2160043-2209630	21.1492	18.8074	0.169299	0.2967	0.454368	no
W03F11.5	I:2216100-2219418	1.69793	1.4279	0.249883	0.49735	0.648255	no
lgc-51	I:2242230-2247282	0.148545	0.109399	0.441299	1	1	no
F12B6.2	I:2250131-2254893	12.701	10.7922	0.23495	0.24785	0.398489	no
Y39G10AL.1	I:2279834-2280868	13.1193	3.49779	1.90717	5e-05	0.000377672	yes
Y39G10AR.11	I:2293132-2304396	13.9109	29.0179	-1.06073	0.00405	0.0161215	yes
Y39G10AR.10	I:2293132-2304396	20.4616	24.3331	-0.250002	0.5728	0.710593	no
Y39G10AR.9	I:2306985-2308913	80.9848	88.1725	-0.122679	0.34355	0.503953	no
Y39G10AR.21	I:2308972-2312086	29.7333	21.8194	0.446467	0.0083	0.0287468	yes
Y39G10AR.20	I:2312496-2313080	110.322	115.885	-0.070968	0.655	0.775899	no
Y39G10AR.8	I:2313271-2316010	169.585	172.831	-0.0273521	0.8248	0.892824	no
Y39G10AR.7	I:2316307-2318286	33.8483	41.5571	-0.296011	0.0389	0.0985224	no
srbc-64	I:2327989-2330155	0.0675069	0.0695814	-0.0436656	1	1	no
ugt-31	I:2333326-2338689	3.42186	15.5972	-2.18844	5e-05	0.000377672	yes
zeel-1	I:2342383-2350469	0.989411	1.45801	-0.559359	0.0736	0.16183	no
nekl-1	I:2357883-2372965	0.816475	0.598257	0.448642	0.188	0.325713	no
zwl-1	I:2402232-2409982	57.0194	64.4944	-0.177721	0.1687	0.300069	no
Y39G10AR.24	I:2410190-2410255	0	0	0	1	1	no
F23C8.13	I:2415133-2420405	8.63655	3.30305	1.38666	0.21975	0.365396	no
ubxn-1	I:2434004-2435637	171.749	177.944	-0.0511211	0.69105	0.802015	no
F23C8.3	I:2438801-2442949	2.82753	2.35918	0.261257	0.48485	0.638606	no
F23C8.1	I:2446763-2448346	1.11175	0.652837	0.768041	0.076	0.165548	no
Y74C10AR.2	I:2472418-2485383	6.48787	0.280933	4.52945	0.1094	0.217543	no
eif-3.I	I:2485869-2489716	159.537	160.362	-0.00744389	0.9513	0.972183	no
Y23H5B.6	I:2489976-2497372	50.1204	52.6402	-0.0707676	0.5812	0.717548	no
Y23H5B.5	I:2498134-2506234	34.8893	39.3482	-0.173512	0.2038	0.345816	no
Y23H5B.4	I:2533268-2542093	2.79303	4.2086	-0.591509	0.03995	0.100652	no
Y23H5B.3	I:2544773-2546154	2.18423	5.78006	-1.40396	0.0004	0.00232501	yes
Y23H5B.2	I:2549296-2550199	0.517846	0.241234	1.10209	1	1	no
Y23H5B.1	I:2553094-2557426	1.46467	1.39241	0.0729864	0.8386	0.901807	no
C55C2.4	I:2558300-2560111	0.645696	0.192727	1.7443	0.02725	0.0749278	no
C55C2.3	I:2560922-2561821	0.629461	0.0965789	2.70434	0.0497	0.119437	no
ssp-19	I:2562658-2563018	20.2185	5.12892	1.97895	5e-05	0.000377672	yes
scrt-1	I:2568760-2570747	0.115298	0.249605	-1.11428	1	1	no
chaperone	I:2599979-2602628	2.99241	0.692659	2.11109	5e-05	0.000377672	yes
ctn-1	I:2606754-2617361	13.1699	13.5349	-0.0394405	0.8171	0.887098	no
Y23H5A.4	I:2617560-2620350	2.52024	1.55145	0.699945	0.05215	0.123799	no
Y23H5A.3	I:2620659-2621855	123.398	132.834	-0.106305	0.41455	0.573411	no
Y23H5A.2	I:2621957-2628578	41.8511	52.4925	-0.326847	0.50005	0.650179	no
Y23H5A.8	I:2633007-2634560	0.814575	0.544454	0.581237	0.3243	0.484971	no
F40E3.7	I:2636904-2637592	1.81361	4.75831	-1.39158	0.0037	0.0149838	yes
F40E3.3	I:2638649-2639314	0.109943	0.134397	-0.289742	1	1	no
F40E3.2	I:2642740-2643704	92.4291	103.008	-0.156338	0.2758	0.430621	no
F32B5.6	I:2668160-2672416	30.8433	37.9809	-0.300317	0.0342	0.0890935	no
F32B5.9	I:2686640-2689474	0	0	0	1	1	no
F32B5.4	I:2692077-2692470	44.2358	15.7121	1.49334	5e-05	0.000377672	yes
F32B5.3	I:2692757-2694085	0.199742	0.030214	2.72485	1	1	no
F32B5.2	I:2697440-2699956	3.22623	1.84013	0.810043	0.02445	0.0687124	no
phosphotransferase	I:2700420-2702083	1.45888	0.395871	1.88176	0.0002	0.00127822	yes
lin-17	I:2707564-2717550	5.67582	5.41836	0.066971	0.78465	0.865164	no
snr-7	I:2727014-2727546	261.349	239.095	0.128393	0.34015	0.500561	no
yop-1	I:2730002-2731455	578.219	489.784	0.239471	0.0542	0.127448	no
Y71F9B.2	I:2731564-2735314	43.021	44.4816	-0.0481699	0.7622	0.850384	no
Y71F9B.1	I:2761172-2776104	39.0447	14.3832	1.44074	0.29225	0.449205	no
W03D8.10	I:2786135-2787513	1.24391	0.144434	3.1064	0.02075	0.0603277	no
W03D8.8	I:2791689-2794896	12.2933	5.57101	1.14186	5e-05	0.000377672	yes
W03D8.7	I:2796383-2797262	3.83846	4.46847	-0.219253	0.53725	0.681525	no
itx-1	I:2802822-2815787	4.24109	6.9991	-0.722734	5e-05	0.000377672	yes
W03D8.5	I:2816758-2817647	3.29717	1.41035	1.22517	0.00375	0.0151584	yes
W03D8.11	I:2818766-2820689	1.21228	0.424823	1.51279	0.01535	0.047467	yes
ccb-2	I:2846720-2849793	0.45139	0.31801	0.505302	1	1	no
Y71F9AL.11	I:2862403-2864447	0.0615387	0.136614	-1.15054	1	1	no
Y71F9AL.10	I:2866508-2869374	45.4121	57.2012	-0.332967	0.04535	0.111309	no
Y71F9AL.9	I:2876930-2878514	351.086	292.101	0.265356	0.0358	0.0923096	no
Y71F9AL.8	I:2878578-2880864	31.7061	59.0994	-0.898384	5e-05	0.000377672	yes
Y71F9AL.7	I:2883546-2893719	2.34193	5.68235	-1.27879	0.1201	0.233517	no
Y71F9AL.6	I:2883546-2893719	1.56339	2.30493	-0.560042	0.75555	0.84628	no
gst-43	I:2901341-2903006	20.9475	31.0089	-0.565907	0.01615	0.0495136	yes
Y71F9AL.4	I:2903596-2924716	6.466	9.66681	-0.580168	0.23565	0.384328	no
Y71F9AL.2	I:2903596-2924716	3.22728	1.64131	0.975474	0.59425	0.72777	no
Y71F9AL.1	I:2925218-2928118	34.2136	32.1485	0.0898184	0.55525	0.696844	no
trap-1	I:2928393-2929658	550.717	344.686	0.676031	5e-05	0.000377672	yes
nxt-1	I:2929777-2931362	201.117	229.37	-0.189642	0.16295	0.292611	no
cogc-3	I:2931461-2947153	32.1674	36.2205	-0.171208	0.20825	0.351779	no
Y71F9AM.7	I:2931461-2947153	0	0	0	1	1	no
dnj-28	I:2996406-3001299	34.3975	28.9126	0.250609	0.0953	0.195667	no
Y54E10BL.3	I:3003545-3013449	0.72007	0.364211	0.983361	0.50275	0.652094	no
col-48	I:3003545-3013449	13.9231	14.4981	-0.0583834	0.9077	0.945167	no
Y54E10BL.1	I:3003545-3013449	0.0708825	0.0349551	1.01993	1	1	no
Y54E10BR.4	I:3015742-3021520	70.7863	126.301	-0.835327	5e-05	0.000377672	yes
Y54E10BR.3	I:3021649-3031093	84.0872	89.376	-0.0880009	0.65475	0.775781	no
Y54E10BR.2	I:3032967-3034762	58.4283	56.0245	0.0606114	0.69815	0.807155	no
Y54E10BR.1	I:3059251-3070141	14.6665	15.0398	-0.0362626	0.85455	0.911705	no
nhr-64	I:3104363-3109543	9.11192	14.3011	-0.650298	0.0056	0.0209748	yes
col-49	I:3137188-3138446	9.11595	0.0766231	6.89447	0.0054	0.0203743	yes
K09H9.2	I:3147996-3150342	51.0529	62.1364	-0.283445	0.03885	0.0984605	no
K09H9.1	I:3152835-3155569	0.0473581	0.156865	-1.72784	1	1	no
Y54E10A.6,Y54E10A.7	I:3162813-3167556	89.7292	90.0492	-0.00513635	0.97755	0.987224	no
Y54E10A.5	I:3167686-3171222	65.6674	64.9981	0.0147797	0.9139	0.948941	no
Y54E10A.17	I:3206799-3209284	67.1496	35.0247	0.939005	5e-05	0.000377672	yes
fog-1	I:3211046-3222951	16.7363	15.8356	0.0798097	0.67525	0.79143	no
Y54E10A.3	I:3229432-3233295	117.172	104.976	0.158575	0.2328	0.380808	no
cogc-1	I:3233391-3255566	24.4685	23.4509	0.0612801	0.78295	0.864465	no
tyrosinase	I:3259871-3264111	1.10775	1.22656	-0.146983	0.68355	0.797033	no
nol-5	I:3267094-3269117	277.456	300.655	-0.11585	0.35945	0.519	no
sulp-6	I:3287382-3293128	1.31725	0.648864	1.02154	0.0027	0.0116311	yes
W01B11.1	I:3299606-3300491	4.69099	1.08208	2.11609	0.00215	0.00957773	yes
Y44E3A.1	I:3338367-3340026	13.906	25.1066	-0.852359	0.00395	0.0158092	yes
W05F2.7	I:3352463-3363363	1.29122	1.25349	0.042784	0.869	0.920494	no
W05F2.6	I:3368814-3371443	89.9118	94.6373	-0.0738984	0.56635	0.705265	no
fbxa-203	I:3371769-3373833	6.62963	7.18391	-0.115841	0.6914	0.802303	no
cdk-2	I:3408033-3415071	18.7632	17.5986	0.0924406	0.6442	0.767294	no
calponin	I:3419600-3424212	91.5713	62.9947	0.539666	0.00415	0.0164431	yes
K03E5.1	I:3429604-3433094	2.22931	1.72287	0.371785	0.27525	0.430059	no
tag-63	I:3439108-3447705	30.4296	35.0588	-0.204297	0.15425	0.281449	no
msh-6	I:3449327-3462171	57.8989	57.715	0.00458847	0.96995	0.982866	no
spg-7	I:3462272-3477972	36.8403	35.0612	0.0714094	0.6634	0.782601	no
Y47G6A.9	I:3479329-3481375	75.3101	83.2414	-0.144457	0.34685	0.507175	no
crn-1	I:3481987-3484500	140.752	151.585	-0.106968	0.38735	0.545903	no
Y47G6A.7	I:3502739-3508426	20.1508	31.1256	-0.627265	0.00055	0.00307621	yes
pcaf-1	I:3516479-3529958	28.5308	31.6786	-0.150987	0.33925	0.499952	no
Y47G6A.5	I:3533995-3539158	6.02532	18.4556	-1.61495	5e-05	0.000377672	yes
Y47G6A.4	I:3547092-3559811	30.6474	29.4136	0.0592815	0.7121	0.815814	no
Y47G6A.27	I:3547092-3559811	0.547631	0.570748	-0.0596487	0.9723	0.984051	no
Y47G6A.33	I:3564065-3600679	182.474	82.7314	1.14118	0.1087	0.216403	no
Y47G6A.3	I:3602021-3602860	8.04717	4.08697	0.97745	0.0081	0.0281745	yes
Y47G6A.31	I:3603344-3604429	8.96415	5.73686	0.643904	0.0435	0.107833	no
inx-22	I:3608396-3611846	79.4861	87.9751	-0.146393	0.254	0.40529	no
inx-21	I:3611910-3618316	31.2065	43.7415	-0.487159	0.0008	0.00423906	yes
Y47G6A.32	I:3620583-3625089	1.62065	0.817138	0.987923	0.0363	0.0933333	no
cah-6	I:3629472-3630732	8.45668	4.35797	0.956433	0.00175	0.00808811	yes
T28F2.2	I:3637354-3638796	21.494	28.8325	-0.423762	0.0652	0.147096	no
T28F2.1	I:3639649-3641471	0.195458	0.09464	1.04634	1	1	no
col-51	I:3653959-3655267	0	0.0475248	#VALUE!	1	1	no
D1037.1	I:3684803-3690145	27.0246	29.4716	-0.125049	0.36645	0.525561	no
hus-1	I:3698108-3699302	50.4544	58.4988	-0.213429	0.17665	0.310341	no
F21A9.1	I:3712174-3713115	1.07509	1.683	-0.646579	0.17105	0.30306	no
glh-4	I:3726012-3731220	32.7111	36.8016	-0.169989	0.1854	0.322332	no
T12F5.2	I:3731353-3740481	17.4847	20.5544	-0.233355	0.7125	0.815848	no
T12F5.1	I:3741469-3742641	72.6519	79.2851	-0.126048	0.3763	0.535501	no
math-46	I:3745590-3748147	0.13888	0.0871175	0.6728	1	1	no
asic-1	I:3769682-3773878	0.673146	0.666533	0.0142426	0.96785	0.982094	no
C32E8.6	I:3774707-3777470	1.5368	1.24922	0.298907	0.41195	0.570737	no
C32E8.5	I:3782119-3783262	86.7573	96.4716	-0.153119	0.24285	0.39324	no
C32E8.4	I:3783836-3784437	13.5597	4.72009	1.52244	0.0001	0.000701046	yes
C32E8.3	I:3786595-3787477	114.784	126.404	-0.13912	0.3201	0.480649	no
rpl-13	I:3788035-3788911	4109.97	4253.42	-0.0494952	0.8256	0.893413	no
C32E8.1	I:3794557-3798055	0.983618	1.66626	-0.760442	0.6784	0.793673	no
npp-11	I:3817997-3821505	58.509	55.1458	0.0854088	0.4967	0.647846	no
unc-108	I:3824948-3826516	223	213.083	0.0656338	0.5995	0.731525	no
F53F10.3	I:3827220-3828133	303.418	265.402	0.19313	0.1457	0.26981	no
F53F10.8	I:3828251-3828684	36.3409	58.9584	-0.698104	0.00445	0.0173463	yes
decarbaxylase	I:3830940-3837767	113.053	143.691	-0.345965	0.00695	0.0249459	yes
T03F1.11	I:3853836-3859294	246.559	152.271	0.695295	0.04515	0.110889	no
pgk-1	I:3867542-3869115	152.622	175.68	-0.202988	0.1042	0.209474	no
coq-4	I:3869222-3870066	43.5472	57.159	-0.3924	0.02755	0.0755236	no
T03F1.1	I:3874038-3875993	79.0014	78.0605	0.0172844	0.89475	0.936567	no
C50F2.3	I:3877064-3880749	41.875	47.4663	-0.180813	0.15335	0.280405	no
C50F2.2	I:3881829-3888315	38.468	33.0204	0.220299	0.09335	0.192664	no
C50F2.1	I:3892333-3895273	0.18658	0.0918822	1.02194	1	1	no
pbs-4	I:3908748-3910544	367.552	319.414	0.202523	0.135	0.255241	no
T21E3.2	I:3930831-3931546	1.45365	0.788525	0.882454	0.0843	0.178972	no
egg-4	I:3932211-3934792	18.1132	22.6272	-0.321014	0.0396	0.099983	no
F47B3.4	I:3961038-3962201	0.611822	0.185775	1.71956	0.01745	0.0526816	no
F47B3.3	I:3964371-3965316	0	0	0	1	1	no
F47B3.2	I:3970375-3971304	0.513441	0.172091	1.57703	1	1	no
F47B3.1	I:3972163-3973705	0.13757	0.036761	1.90392	1	1	no
ars-2	I:3983172-3986917	64.3002	65.2475	-0.0210999	0.8632	0.916808	no
cpn-3	I:3987892-3988701	482.537	558.178	-0.210084	0.09505	0.195309	no
F28H1.1	I:3995710-3996952	21.4359	19.0711	0.168646	0.37465	0.534189	no
F55C7.2	I:3999349-4031628	0	0	0	1	1	no
unc-89	I:4035893-4090875	16.7918	12.8715	0.383573	0.03605	0.0928455	no
C24G7.4	I:4094610-4098328	1.52067	0.957961	0.666672	0.0448	0.110187	no
C24G7.2	I:4103713-4108046	0.615809	1.27299	-1.04767	0.00345	0.0141687	yes
C24G7.1	I:4109407-4112386	0.225236	0.077179	1.54515	1	1	no
cyb-2.2	I:4114861-4116370	163.552	139.924	0.225102	0.07485	0.163807	no
H31G24.3	I:4116851-4118163	17.6194	22.4496	-0.34953	0.08365	0.177837	no
H31G24.1	I:4123481-4124705	0.237598	0.222537	0.0944746	1	1	no
lin-44	I:4126056-4129308	3.66335	2.65867	0.462461	0.17115	0.303167	no
E01A2.2	I:4132500-4135240	118.595	120.173	-0.0190665	0.8763	0.9253	no
E01A2.1	I:4139514-4144584	104.091	85.6305	0.281655	0.04545	0.111466	no
R12E2.14	I:4149981-4150635	34.3583	26.5044	0.374426	0.28225	0.437588	no
inx-16	I:4162057-4165016	23.0545	30.4568	-0.401721	0.01695	0.0514645	no
inx-17	I:4165135-4167058	17.1204	24.9176	-0.541447	0.0066	0.0239349	yes
R12E2.16	I:4172206-4172316	0	0	0	1	1	no
rpn-8	I:4175317-4177270	246.094	325.815	-0.404845	0.001	0.00510063	yes
R12E2.17	I:4175317-4177270	0	0	0	1	1	no
R12E2.2	I:4178812-4182159	92.4839	119.451	-0.369149	0.00305	0.012876	yes
R12E2.1	I:4182221-4184994	40.8062	52.9043	-0.374596	0.0055	0.0206908	yes
ppw-1	I:4185061-4189930	11.7578	7.78695	0.59449	0.00555	0.020828	yes
cas-2	I:4190159-4193119	67.5279	81.4727	-0.270833	0.03765	0.0960193	no
C18E3.5	I:4193242-4203307	37.6116	57.6015	-0.61493	0.00015	0.00100493	yes
C18E3.4	I:4193242-4203307	0.25983	0.407529	-0.649338	1	1	no
C18E3.3	I:4203459-4208521	7.7281	8.24351	-0.0931444	0.61685	0.74602	no
C18E3.2	I:4210980-4212669	88.7992	109.413	-0.30116	0.01885	0.0560733	no
C18E3.1	I:4212743-4214263	2.72209	2.60083	0.0657417	0.838	0.901458	no
nab-1	I:4229577-4236040	7.93573	12.9577	-0.707372	0.00035	0.00207829	yes
C43E11.5	I:4237034-4238607	0.71426	0.323075	1.14458	0.03505	0.0908623	no
tufm-2	I:4247757-4249328	76.9503	80.4316	-0.0638361	0.6175	0.746513	no
C43E11.11	I:4249493-4253145	63.4219	68.9117	-0.119767	0.35365	0.513561	no
C43E11.12	I:4253242-4254140	105.517	116.969	-0.148646	0.30595	0.464318	no
met-1	I:4254380-4264690	28.9846	30.6264	-0.0794901	0.5244	0.670746	no
mus-81	I:4265109-4267187	63.0913	92.8565	-0.557562	0.0001	0.000701046	yes
cogc-5	I:4270697-4273327	59.831	74.8863	-0.323809	0.01085	0.0357621	yes
Y47D9A.3	I:4275931-4276754	1.48999	0.358607	2.05483	0.0117	0.038067	yes
scpl-3	I:4298259-4302238	20.6718	18.6166	0.151074	0.41135	0.570367	no
Y47D9A.1	I:4303930-4308245	98.5302	128.42	-0.382227	0.00315	0.0132221	yes
acr-6,anc-1	I:4321095-4362549	4.49541	5.15794	-0.198343	0.11525	0.22643	no
ZK973.4	I:4363415-4364037	2.51311	0.512025	2.29518	0.0055	0.0206908	yes
phosphatase	I:4368089-4372137	87.6394	88.3919	-0.0123359	0.9359	0.962253	no
ZK973.2	I:4373663-4381899	46.9812	53.4669	-0.186562	0.24825	0.398924	no
ZK973.1	I:4382565-4385219	126.142	148.304	-0.2335	0.06295	0.142794	no
dhc-1	I:4386787-4401981	30.9068	35.1776	-0.186734	0.14135	0.263848	no
T21E12.3	I:4403392-4404586	0.651744	0.307212	1.08507	0.1697	0.301361	no
T21E12.2	I:4409692-4419306	0.684273	0.672324	0.0254143	0.95395	0.973393	no
C11D9.1	I:4422032-4426138	3.92915	3.99749	-0.0248759	0.92605	0.956529	no
eif-3.H	I:4444719-4446586	84.9615	85.5645	-0.0102023	0.9333	0.960541	no
C41D11.1	I:4457383-4458672	8.72659	11.9847	-0.457701	0.07475	0.163704	no
T01A4.3	I:4463854-4466904	2.71899	1.71215	0.66726	0.02265	0.0645963	no
T01A4.2	I:4481238-4484425	7.53108	8.97127	-0.252455	0.382	0.540617	no
gcy-28	I:4491701-4508362	37.2559	36.8168	0.0171025	0.90485	0.943869	no
Y119C1B.12	I:4520070-4522769	2.37654	0.482374	2.30064	0.0039	0.0156457	yes
Y119C1B.3	I:4550478-4552759	2.52232	1.20485	1.0659	0.00325	0.0135313	yes
Y119C1B.1	I:4554150-4555204	4.0468	1.31539	1.62129	0.00045	0.00257771	yes
D1007.15	I:4557664-4563695	5.88422	6.42577	-0.12702	0.5022	0.651655	no
pqn-24	I:4564061-4565925	29.9232	35.1932	-0.234028	0.202	0.343556	no
D1007.13	I:4566495-4568386	1.64588	2.3983	-0.543157	0.28905	0.44562	no
rpl-24.1	I:4585113-4586178	4511.9	4634.07	-0.0385428	0.83185	0.898058	no
D1007.20	I:4585113-4586178	0	0	0	1	1	no
D1007.17	I:4585113-4586178	0	0	0	1	1	no
D1007.10	I:4586273-4589392	32.3061	44.5966	-0.465127	0.01065	0.0351706	yes
D1007.9	I:4590430-4591588	0	0.0429281	#VALUE!	1	1	no
D1007.16	I:4603223-4604197	143.777	160.916	-0.162473	0.21095	0.354977	no
D1007.8	I:4604403-4605385	42.438	50.6311	-0.254669	0.12315	0.237797	no
C44E4.5	I:4605655-4622973	50.7864	73.3461	-0.530279	0.0216	0.0621656	no
C44E4.8	I:4605655-4622973	29.8986	17.2815	0.79085	0.18065	0.316214	no
C44E4.4	I:4634103-4635621	211.841	247.456	-0.224188	0.0703	0.155976	no
B0041.3	I:4644680-4645626	30.9586	31.268	-0.0143435	0.95535	0.974319	no
B0041.8	I:4647309-4648276	211.706	155.184	0.448083	0.00075	0.00400858	yes
B0041.2	I:4655347-4660143	59.6451	67.2076	-0.172222	0.17515	0.308691	no
B0041.1	I:4664871-4671739	0.629499	0.12803	2.29772	0.23995	0.389855	no
unc-57	I:4675135-4679391	102.513	99.4276	0.044094	0.72985	0.828624	no
T04D1.2	I:4679671-4682756	1.65268	1.59429	0.0518985	0.8887	0.93315	no
W09C3.4	I:4704622-4705803	49.6054	55.5173	-0.162441	0.29945	0.457352	no
W09C3.3	I:4707905-4708763	0.874262	1.11429	-0.349989	0.52135	0.667954	no
W09C3.2	I:4711428-4713447	1.47446	0.346597	2.08886	0.00035	0.00207829	yes
W09C3.1	I:4717623-4719576	0.0464176	0.0482622	-0.0562217	1	1	no
C10H11.7	I:4719789-4721099	3.25896	1.20748	1.43241	0.0006	0.00331852	yes
ugt-26	I:4721178-4723961	24.9807	10.3157	1.27598	5e-05	0.000377672	yes
ugt-27	I:4724065-4726764	0.282925	0.317239	-0.165148	1	1	no
ugt-28	I:4727301-4730367	12.9724	8.21311	0.659441	0.00275	0.0117904	yes
ugt-25	I:4731604-4735280	9.55534	2.74241	1.80086	5e-05	0.000377672	yes
viln-1	I:4747627-4759602	34.052	48.3884	-0.50692	0.0001	0.000701046	yes
M04F3.2	I:4765754-4767516	14.2471	10.6861	0.414936	0.1549	0.282468	no
rpa-2	I:4769694-4771362	273.821	239.825	0.191253	0.1291	0.246323	no
gnrr-1	I:4800098-4804172	0.992433	0.496299	0.99976	0.04905	0.118243	no
F54D7.2	I:4805607-4809675	78.8724	73.3504	0.104715	0.41645	0.575162	no
F57C9.6	I:4821976-4824812	1.6223	1.1299	0.52185	0.1604	0.289584	no
htp-3	I:4827072-4829769	52.0293	61.5392	-0.242182	0.05625	0.131168	no
F57C9.4	I:4830135-4835619	69.5335	70.4647	-0.0191924	0.88925	0.933335	no
F57C9.3	I:4836187-4840172	3.84438	3.63531	0.0806714	0.83985	0.902647	no
clec-90	I:4844908-4847917	14.5862	12.3978	0.234514	0.2403	0.390136	no
F57C9.1	I:4848989-4867826	40.9645	38.3452	0.0953287	0.56845	0.707246	no
F25F8.1	I:4884903-4895496	4.44522	3.7798	0.233946	0.4533	0.610408	no
F21F3.4	I:4896003-4897542	20.5469	22.0547	-0.102163	0.59685	0.729852	no
F21F3.3	I:4901974-4903137	3.39241	2.07287	0.710682	0.04205	0.104948	no
F21F3.2	I:4903437-4905139	2.34279	0.589956	1.98955	0.0001	0.000701046	yes
F21F3.1	I:4906823-4914050	106.962	92.6999	0.206456	0.4458	0.603208	no
F21F3.7	I:4918396-4920366	31.1823	30.2053	0.0459259	0.84505	0.905646	no
F28B3.5	I:4926648-4928743	71.0622	84.7111	-0.253469	0.0539	0.126917	no
acl-11	I:4929099-4932148	22.6893	24.4854	-0.109906	0.54325	0.686424	no
F28B3.4	I:4934118-4940510	2.61773	4.19203	-0.679331	0.0209	0.0606494	no
F28B3.1	I:4943630-4949329	20.0391	24.2607	-0.275806	0.0335	0.0877446	no
W03G9.3	I:4959398-4961520	3.54338	2.90862	0.284787	0.30015	0.458013	no
W03G9.2	I:4962452-4964239	29.3459	33.1404	-0.175431	0.23075	0.378097	no
W03G9.9	I:4970423-4972227	0.0978672	0.126875	-0.374513	1	1	no
snf-1	I:4980306-4983956	20.7271	23.586	-0.18641	0.2194	0.364932	no
mes-3	I:4996841-5003161	30.207	34.4172	-0.188248	0.1542	0.281449	no
dom-3	I:5003450-5006012	27.9581	30.9239	-0.145452	0.3878	0.546217	no
sst-20	I:5006745-5007991	9.14739	2.37835	1.9434	5e-05	0.000377672	yes
F54C1.1	I:5008788-5013374	1.52586	1.94052	-0.34682	0.2692	0.422887	no
C46H11.6	I:5020876-5023166	1.79526	0.366022	2.29419	0.00015	0.00100493	yes
lfe-2	I:5027154-5041149	21.0049	28.2458	-0.427312	0.00835	0.0288681	yes
C46H11.3	I:5041491-5042055	0.329501	0.641186	-0.960458	0.2616	0.41445	no
C46H11.2	I:5050051-5052526	7.29003	32.9142	-2.17471	5e-05	0.000377672	yes
C46H11.1	I:5055688-5056042	0	0	0	1	1	no
kin-32	I:5086312-5093796	5.71725	5.19653	0.137772	0.5145	0.661764	no
C30F8.3	I:5096603-5100497	0.890592	0.393477	1.17849	0.02475	0.0693531	no
Y110A7A.20	I:5100768-5101677	2.45209	5.47152	-1.15793	0.0127	0.0406849	yes
Y110A7A.11	I:5106223-5107624	62.6576	57.3464	0.127785	0.42	0.578871	no
aap-1	I:5107845-5113755	58.552	65.2995	-0.157354	0.3696	0.529045	no
Y110A7A.9	I:5119225-5127205	48.9084	59.4592	-0.281817	0.1375	0.258667	no
Y110A7A.7,Y110A7A.8	I:5127830-5131068	123.043	133.169	-0.1141	0.3892	0.547788	no
phosphofructokinase	I:5131290-5134102	151.015	195.553	-0.372868	0.0028	0.0119715	yes
mtm-1	I:5134769-5137960	25.9626	28.9382	-0.156541	0.30325	0.461448	no
Y110A7A.4	I:5138263-5139383	91.8699	105.817	-0.2039	0.12225	0.236652	no
unc-63	I:5141677-5149229	2.49993	2.19187	0.189724	0.5339	0.678952	no
Y110A7A.2	I:5154531-5158470	0.37783	0.590017	-0.643018	0.223	0.368692	no
hcp-6	I:5165159-5175525	28.118	27.5557	0.0291407	0.9016	0.941435	no
F56A3.2,npp-6	I:5176468-5186235	74.4746	85.3968	-0.197433	0.21665	0.361803	no
bro-1	I:5186965-5188619	1.99754	0.915114	1.1262	0.05495	0.128936	no
fncm-1	I:5190150-5195181	21.9924	25.333	-0.204011	0.162	0.291483	no
pde-5	I:5196080-5199940	0.571438	0.401217	0.510213	0.68505	0.797997	no
C32E12.1	I:5230565-5241917	3.06413	0.719442	2.09053	0.12605	0.2417	no
B0261.4	I:5244285-5245295	105.262	140.403	-0.415591	0.00305	0.012876	yes
let-363	I:5245745-5263427	18.5643	22.1245	-0.253116	0.04655	0.113531	no
B0261.1	I:5263696-5268385	50.0487	52.6256	-0.0724347	0.56895	0.707411	no
F48C1.3	I:5314335-5314609	0	0	0	1	1	no
fbxa-145	I:5319733-5321070	6.56427	10.1387	-0.627166	0.01805	0.0540588	no
aman-3	I:5324513-5330215	3.47335	5.22227	-0.588348	0.01125	0.0368206	yes
F55A12.6	I:5338924-5341980	0.54517	0.240842	1.17862	0.02865	0.0778603	no
F55A12.5	I:5345930-5349648	63.5257	63.2815	0.00555612	0.9665	0.98108	no
dhs-2	I:5354162-5357026	7.6529	17.1185	-1.16148	5e-05	0.000377672	yes
ppk-1	I:5358522-5365173	46.6038	49.7057	-0.092965	0.4611	0.61778	no
F55A12.2	I:5365267-5366844	32.0259	29.697	0.108923	0.5643	0.703959	no
F55A12.1	I:5368480-5372474	61.487	44.5711	0.464172	0.0006	0.00331852	yes
C24A11.2	I:5372857-5384511	0	0.0989338	#VALUE!	1	1	no
C24A11.1	I:5401810-5402894	10.567	3.07727	1.77984	5e-05	0.000377672	yes
F27C1.4	I:5421316-5428451	7.5236	6.63195	0.181989	0.87625	0.9253	no
F27C1.3	I:5421316-5428451	2.57577	0.707625	1.86395	0.2722	0.426643	no
F27C1.2	I:5430166-5431452	184.138	220.462	-0.259742	0.04045	0.101696	no
F27C1.1	I:5433909-5443029	53.848	17.3092	1.63735	0.00525	0.0199402	yes
C09D4.3	I:5488342-5490629	5.25732	1.45034	1.85794	5e-05	0.000377672	yes
C09D4.2	I:5491476-5493189	40.2978	83.6787	-1.05416	5e-05	0.000377672	yes
C09D4.1	I:5497780-5507026	14.8397	10.6105	0.483973	0.1006	0.204155	no
F59A3.2	I:5512050-5516028	42.3753	49.9152	-0.236258	0.0668	0.149872	no
carboxypeptidase	I:5520391-5529761	12.9255	11.4081	0.180153	0.26765	0.421269	no
tom-1	I:5546229-5561645	20.7166	15.6333	0.406162	0.5113	0.659299	no
M01A10.1	I:5563832-5566242	33.3608	28.6947	0.217371	0.1311	0.249336	no
M01E11.3	I:5573245-5576741	20.0811	21.0587	-0.0685778	0.62925	0.754973	no
M01E11.2	I:5579666-5581860	77.2451	87.2668	-0.17599	0.16305	0.292723	no
M01E11.1	I:5582104-5597335	49.2881	53.7006	-0.123699	0.5518	0.6937	no
cey-2	I:5619569-5620671	2192.34	1700.6	0.366423	0.03685	0.0944323	no
F46F11.7	I:5620782-5622924	12.5165	18.9803	-0.600677	0.0099	0.0331268	yes
F46F11.1	I:5627821-5637620	28.777	37.0627	-0.36505	0.0049	0.0188149	yes
M01A12.4	I:5643312-5644060	1.1186	0.73271	0.610374	0.2495	0.400307	no
M01A12.3,col-53	I:5644739-5646317	4.96799	3.74706	0.406904	0.3395	0.50013	no
ptr-10	I:5662145-5667147	3.11541	1.02052	1.61011	5e-05	0.000377672	yes
T19B4.5	I:5674411-5676241	81.3065	87.736	-0.109798	0.40375	0.562563	no
dnj-21	I:5676829-5677649	98.1416	83.7911	0.228067	0.2369	0.385795	no
T19B4.3	I:5678634-5691506	155.954	133.316	0.226271	0.31695	0.477221	no
npp-7	I:5691840-5697505	76.043	76.9007	-0.0161803	0.8913	0.934797	no
monooxygenase	I:5702158-5705556	8.22393	22.6939	-1.46441	5e-05	0.000377672	yes
T19B4.8	I:5707048-5707122	0	0	0	1	1	no
lim-7	I:5716678-5725359	5.13817	5.27585	-0.0381491	0.88985	0.933721	no
nhr-266	I:5736237-5741625	0.171016	0.0580068	1.55983	1	1	no
F56H1.6	I:5744186-5745522	62.7471	52.9603	0.244639	0.0835	0.177616	no
che-14	I:5746727-5754294	1.99262	1.12914	0.819445	0.01065	0.0351706	yes
T22E7.2	I:5767046-5768193	0.629623	0.436443	0.528694	0.34095	0.501285	no
T22E7.1	I:5768965-5773620	14.0266	9.63136	0.542356	0.0217	0.0623835	no
hil-5	I:5774587-5775613	600.668	647.868	-0.109132	0.38745	0.545923	no
rnt-1	I:5776099-5788613	1.16637	1.35563	-0.216934	0.5439	0.687132	no
srz-4	I:5801874-5803269	0.0684078	0.0827271	-0.274199	1	1	no
lin-35	I:5807711-5815640	50.5204	57.8419	-0.195248	0.33905	0.499801	no
obr-4	I:5829393-5834643	82.7539	109.598	-0.40532	0.00085	0.00446105	yes
ceh-12	I:5840291-5841889	0.198615	0.150251	0.402597	1	1	no
col-54	I:5842716-5843968	10.6417	3.47484	1.6147	5e-05	0.000377672	yes
F33D11.2	I:5847263-5849394	2.00421	0.362537	2.46684	5e-05	0.000377672	yes
F33D11.1	I:5852047-5852877	1.19126	0.120311	3.30765	0.1176	0.23003	no
C34G6.5	I:5872176-5874285	89.0582	110.765	-0.314683	0.0135	0.0427764	yes
pgp-2	I:5886627-5895942	11.3585	11.9578	-0.0741758	0.63325	0.757883	no
C34G6.3	I:5896654-5897386	15.7172	3.25377	2.27216	5e-05	0.000377672	yes
tyr-4	I:5898305-5904692	23.3544	23.9526	-0.0364863	0.8966	0.937675	no
C34G6.1	I:5906713-5917784	17.5042	19.5297	-0.157966	0.22365	0.369489	no
B0207.5	I:5919788-5935418	0.108988	0.0578864	0.912871	1	1	no
air-2	I:5937478-5938883	112.92	124.288	-0.138383	0.2748	0.429539	no
gpa-14	I:5942420-5945539	2.13978	1.58951	0.428873	0.21475	0.359761	no
B0207.2	I:5955032-5956885	2.82629	2.24701	0.330904	0.37155	0.531047	no
B0207.1	I:5965063-5967213	1.10861	0.282448	1.97269	0.00015	0.00100493	yes
Y76G2A.2	I:5978984-5979435	0	0	0	1	1	no
Y76G2A.1	I:5979501-5980138	0	0.0616253	#VALUE!	1	1	no
C06A5.3	I:5986493-5990583	55.4798	65.377	-0.236821	0.0632	0.143276	no
sir-2.4	I:5991072-5992630	34.9877	48.0279	-0.457023	0.0096	0.0323124	yes
C06A5.2	I:6006334-6007297	2.1606	1.13062	0.934314	0.03425	0.0891936	no
C06A5.1	I:6012059-6021985	16.9297	20.6658	-0.287687	0.0282	0.0769223	no
csn-2	I:6022658-6026874	101.058	135.813	-0.426432	0.00065	0.00356182	yes
B0025.4	I:6027195-6028372	77.0505	76.6222	0.00804052	0.96015	0.977597	no
vps-34	I:6028487-6033459	27.4655	32.6178	-0.24804	0.0662	0.148938	no
C27A12.4	I:6036598-6037483	0.598112	0.903963	-0.595846	0.1918	0.330328	no
tag-146	I:6038407-6041271	60.1543	64.8575	-0.108605	0.39945	0.558035	no
C27A12.2	I:6041671-6046011	57.6256	59.3443	-0.0424002	0.73785	0.834273	no
mbd-2	I:6061781-6068034	67.4166	59.0147	0.19203	0.35195	0.512057	no
haf-9	I:6081813-6085964	24.2118	18.0766	0.421587	0.005	0.0191369	yes
ZK484.1	I:6093306-6094422	727.621	1346.06	-0.887484	5e-05	0.000377672	yes
T27A3.4	I:6098978-6099728	26.0951	5.40986	2.27012	5e-05	0.000377672	yes
ssp-16	I:6102033-6102465	39.2518	11.0933	1.82307	5e-05	0.000377672	yes
T27A3.8	I:6104806-6105561	2.37543	2.2255	0.0940624	0.87045	0.921523	no
T27A3.2	I:6110135-6114539	57.0673	58.3229	-0.0313978	0.8022	0.876674	no
T27A3.1	I:6122591-6126853	49.8355	39.5696	0.332784	0.01625	0.0497509	yes
F56F4.4,opt-3	I:6133244-6138957	5.26272	4.24324	0.310641	0.1899	0.327936	no
F56F4.3	I:6141470-6144353	0.880051	0.327417	1.42646	0.00615	0.0226441	yes
ttr-55	I:6146043-6146479	0.229148	0.0679743	1.75322	1	1	no
ttr-56	I:6146551-6147232	1.56267	0.472548	1.72548	0.0215	0.0619356	no
sdz-22	I:6148101-6149143	0.445574	0.0746582	2.57729	1	1	no
F56F4.8	I:6149237-6150432	3.76992	1.01927	1.887	5e-05	0.000377672	yes
T09B4.5	I:6154076-6159124	27.5931	34.4682	-0.320957	0.0408	0.102392	no
T09B4.4	I:6167949-6168621	15.7744	24.2419	-0.619917	0.02485	0.0695954	no
T09B4.3	I:6176381-6177792	4.1276	2.10715	0.970008	0.041	0.102777	no
T09B4.2	I:6184080-6185308	101.195	130.354	-0.365301	0.0054	0.0203743	yes
T09B4.1	I:6185463-6188060	147.264	133.945	0.136756	0.2733	0.427871	no
T05E7.3	I:6188160-6194898	41.4918	45.3027	-0.126773	0.31735	0.47759	no
col-55	I:6199142-6200195	0.020036	0	#NAME?	1	1	no
T05E7.1	I:6203898-6206925	7.76058	6.76017	0.199105	0.4217	0.580332	no
T08B2.5	I:6215670-6219913	61.2275	64.1947	-0.068274	0.59045	0.72496	no
T08B2.4	I:6225559-6225966	0.713096	1.01653	-0.51148	0.4871	0.640475	no
T08B2.3	I:6228100-6229733	0.289475	0.223747	0.371571	1	1	no
col-56	I:6232778-6234282	0.692653	0.512859	0.43357	0.3821	0.540709	no
C48E7.7	I:6234720-6235345	3.3251	0.983718	1.75708	0.00225	0.00994557	yes
C48E7.6	I:6239541-6250069	1.71446	2.26551	-0.402078	0.2617	0.414486	no
cof-2	I:6250572-6252823	0.854613	2.09231	-1.29175	0.00065	0.00356182	yes
C48E7.11	I:6253070-6253524	91.0432	97.4138	-0.0975749	0.6249	0.751685	no
lpd-2	I:6253702-6254879	69.8582	89.184	-0.352356	0.0096	0.0323125	yes
C48E7.2	I:6255036-6257637	55.8272	78.5254	-0.492191	0.0003	0.00181567	yes
C48E7.1	I:6260250-6264523	95.4802	60.8501	0.649942	5e-05	0.000377672	yes
C10G11.7	I:6284974-6289340	238.287	232.432	0.0358885	0.7747	0.858555	no
C10G11.6	I:6290007-6293857	14.8104	16.0493	-0.115895	0.5705	0.708595	no
pnk-1	I:6295070-6297627	78.8072	121.77	-0.627757	5e-05	0.000377672	yes
srh-49	I:6297768-6299731	0.0869659	0.00574005	3.92131	1	1	no
srh-51	I:6300494-6302255	0.0463445	0	#NAME?	1	1	no
srh-50	I:6302475-6304265	0.108288	0.0655197	0.724869	1	1	no
C10G11.1	I:6307428-6308431	0.483926	0.186875	1.37271	1	1	no
F26B1.5	I:6309115-6310783	1.1081	0.304262	1.8647	0.00435	0.0170254	yes
col-58	I:6311252-6312415	2.63556	1.15622	1.18869	0.00335	0.0138133	yes
srg-14	I:6312751-6314594	0.252768	0.108823	1.21583	1	1	no
ima-2	I:6315232-6317269	366.76	411.944	-0.167609	0.21485	0.35985	no
F26B1.2	I:6317702-6323993	188.19	185.728	0.0189981	0.8799	0.927576	no
F26B1.1	I:6326876-6330181	34.5994	10.4943	1.72114	5e-05	0.000377672	yes
bli-4	I:6342232-6358397	78.2426	88.8979	-0.184195	0.22965	0.376695	no
K04F10.3	I:6358603-6360459	139.231	162.623	-0.224059	0.07875	0.170119	no
K04F10.2	I:6360845-6364062	1.17828	1.2402	-0.0738875	0.83305	0.898616	no
K04F10.1	I:6364919-6366222	6.93423	11.1189	-0.681209	0.00595	0.0220871	yes
K04F10.7	I:6366362-6368084	68.4801	61.6748	0.151003	0.2511	0.402162	no
ZC308.4	I:6368272-6369600	166.038	173.043	-0.0596209	0.6371	0.761191	no
gld-2	I:6369966-6386145	50.4452	60.2046	-0.255157	0.0439	0.108598	no
ZC328.1	I:6404588-6405683	26.4879	8.11769	1.70619	5e-05	0.000377672	yes
san-1	I:6407519-6416885	66.8421	93.1549	-0.478875	0.00195	0.00885575	yes
R10A10.1	I:6418566-6418811	0	0	0	1	1	no
ncbp-1	I:6422010-6428944	60.6279	64.6349	-0.0923324	0.4553	0.612245	no
snt-4	I:6436120-6441193	44.985	28.953	0.635733	5e-05	0.000377672	yes
npp-12	I:6447333-6453944	40.0358	44.1787	-0.142059	0.2585	0.410854	no
knl-2	I:6460434-6464265	55.6152	57.6462	-0.051745	0.6787	0.793903	no
K06A5.3	I:6464299-6467517	8.29037	3.50698	1.24121	0.4292	0.587609	no
K06A5.2	I:6468130-6469386	31.3507	11.5274	1.44343	5e-05	0.000377672	yes
K06A5.1	I:6474060-6488984	50.0928	64.2005	-0.357981	0.00875	0.0300019	yes
sulp-1	I:6474060-6488984	1.71878	0.896798	0.938527	0.38955	0.548051	no
uri-1	I:6494291-6496108	98.6007	116.511	-0.240796	0.05365	0.126444	no
acdh-1	I:6497439-6499561	1133.02	608.618	0.896566	5e-05	0.000377672	yes
C55B7.3	I:6499842-6501362	20.093	6.1547	1.70693	5e-05	0.000377672	yes
gly-2	I:6503361-6513843	5.03226	4.78071	0.0739809	0.84945	0.908384	no
glh-2	I:6514021-6517508	50.1611	68.1945	-0.443087	0.00035	0.00207829	yes
T10E9.4	I:6525049-6528690	16.2328	4.32014	1.90976	5e-05	0.000377672	yes
T10E9.3	I:6534072-6539189	4.12786	2.27087	0.862147	0.0026	0.0112633	yes
T10E9.2	I:6542100-6544954	55.5335	55.1626	0.0096669	0.94025	0.964987	no
T10E9.1	I:6545110-6546496	58.6808	64.3251	-0.132493	0.341	0.501285	no
tre-1	I:6554729-6558594	97.5804	101.447	-0.0560576	0.6468	0.769379	no
xpg-1	I:6558700-6562300	27.4233	37.1638	-0.438497	0.00125	0.00615572	yes
F57B10.5	I:6562699-6563652	179.624	173.51	0.0499681	0.70305	0.81033	no
F57B10.4	I:6566173-6568906	49.7327	53.4254	-0.103331	0.42265	0.58112	no
F57B10.3	I:6569494-6572599	124.777	187.604	-0.588346	5e-05	0.000377672	yes
let-607	I:6574004-6585168	55.0694	54.8513	0.00572396	0.96305	0.979191	no
try-6	I:6585304-6587883	0.941523	0.896009	0.0714837	0.8614	0.91559	no
F48A9.2	I:6592332-6593832	1.36878	1.72987	-0.337781	0.4244	0.582746	no
F48A9.1	I:6594441-6596026	5.65772	5.2686	0.102799	0.704	0.810812	no
D2092.6	I:6596919-6598929	3.10669	2.60646	0.253284	0.46335	0.619609	no
tsp-19	I:6616304-6618543	1.05366	0.267594	1.97729	0.0025	0.010879	yes
D2092.8	I:6620665-6621283	8.17907	9.55812	-0.224789	0.52585	0.672043	no
ZC581.3	I:6651220-6655430	7.53839	11.1119	-0.559778	0.00505	0.0192708	yes
ZC581.2	I:6655715-6657507	2.57296	0.799631	1.68602	0.0003	0.00181567	yes
nekl-2	I:6663143-6665160	6.90729	9.23802	-0.419463	0.0905	0.188448	no
C17F3.1	I:6665183-6670404	72.543	22.3609	1.69786	0.02705	0.0745241	no
C17F3.3	I:6682368-6683373	2.01155	0.34612	2.53896	0.0008	0.00423906	yes
rmd-5	I:6710870-6712326	0.856392	0.182915	2.2271	0.01105	0.0363125	yes
T23B3.2	I:6715950-6716983	54.9733	68.2705	-0.31253	0.12005	0.233479	no
T23B3.1	I:6717829-6721047	99.2292	120.091	-0.275289	0.13145	0.249847	no
mec-6	I:6724917-6729377	1.9096	3.16135	-0.727274	0.59895	0.731143	no
dhod-1	I:6736686-6741175	78.0748	70.2535	0.152287	0.2352	0.383716	no
W02D3.1	I:6741276-6741881	325.111	511.484	-0.653755	5e-05	0.000377672	yes
W02D3.12	I:6741984-6745340	81.6264	89.5649	-0.133898	0.73065	0.828812	no
gpc-2	I:6757756-6758177	399.418	405.791	-0.02284	0.86585	0.918546	no
F08B6.1	I:6760432-6761353	100.194	115.418	-0.204084	0.3296	0.490374	no
cye-1	I:6780806-6784360	97.9092	120.173	-0.295599	0.0196	0.0578132	no
acdh-5	I:6784881-6787071	3.92034	1.22133	1.68253	5e-05	0.000377672	yes
pqn-20	I:6791025-6797471	32.8662	29.5556	0.15317	0.22815	0.374993	no
E02D9.1	I:6800384-6810387	141.032	175.427	-0.314844	0.03615	0.0930253	no
ulp-5	I:6812700-6814049	25.5212	27.0937	-0.0862611	0.6621	0.781785	no
tag-203	I:6814528-6834677	37.3874	42.3177	-0.17871	0.1683	0.29953	no
K02F2.2	I:6836388-6838138	1451.4	969.849	0.581611	0.002	0.00905081	yes
dpf-3	I:6838352-6843342	99.352	100.982	-0.0234747	0.84835	0.907793	no
dpy-14	I:6843593-6845133	3.14191	104.555	-5.05647	5e-05	0.000377672	yes
H27M09.3	I:6847509-6849922	70.576	69.3269	0.0257626	0.83395	0.899128	no
rpb-5	I:6850418-6851211	274.231	304.055	-0.148939	0.2335	0.38171	no
helicase	I:6851370-6854118	51.1402	56.518	-0.144253	0.2766	0.431433	no
glh-1	I:6854686-6857528	111.443	144.262	-0.372381	0.00355	0.0145175	yes
T21G5.2,T21G5.6	I:6862395-6871168	10.655	7.19298	0.566863	0.0334	0.0875571	no
T21G5.1	I:6874302-6876927	1.84183	0.589746	1.64297	0.0004	0.00232501	yes
C48B6.4	I:6889252-6891444	2.49792	0.754815	1.72653	5e-05	0.000377672	yes
C48B6.3	I:6915045-6916565	137.307	151.82	-0.144952	0.2446	0.394995	no
C48B6.2	I:6916764-6917557	79.5297	78.3486	0.0215863	0.89795	0.938769	no
ztf-4	I:6926283-6929662	71.7423	58.0166	0.306358	0.0256	0.0712941	no
T10B11.2	I:6931136-6936917	69.2755	78.4477	-0.179385	0.16005	0.289088	no
pcbd-1	I:6951133-6954230	69.9476	85.2693	-0.285751	0.23975	0.389654	no
C30F12.7	I:6974556-6977063	23.1755	26.4283	-0.189482	0.2643	0.417574	no
C30F12.6	I:6989065-6992105	6.71127	5.73305	0.227283	0.38395	0.542629	no
ctg-1	I:7005441-7015207	32.4626	37.7088	-0.216122	0.3764	0.535545	no
F15C11.2	I:7021980-7029075	93.0518	86.754	0.101104	0.42025	0.57906	no
sem-4	I:7038896-7048833	11.1883	6.12263	0.869767	5e-05	0.000377672	yes
mdt-28	I:7057168-7059326	213.769	266.835	-0.319899	0.01385	0.0436967	yes
cutl-6	I:7065261-7067898	1.31879	0.348462	1.92015	0.0011	0.00552654	yes
W01A8.5	I:7069440-7074732	125.885	170.54	-0.438004	0.0004	0.00232501	yes
nduf-6	I:7090621-7094531	216.18	220.472	-0.0283621	0.90015	0.940176	no
ekl-1	I:7095486-7098405	42.7006	52.7668	-0.305373	0.021	0.0608708	no
F22D6.9	I:7099829-7101760	25.3924	30.3172	-0.255741	0.1293	0.246643	no
col-60	I:7105317-7106724	10.2939	0.445337	4.53074	5e-05	0.000377672	yes
beta-1,6-N-acetylglucosaminyltransferase	I:7110238-7112286	1.40052	0.7826	0.839613	0.04525	0.111081	no
beta-1,6-N-acetylglucosaminyltransferase	I:7112916-7115023	4.42146	8.91396	-1.01154	0.00015	0.00100493	yes
glr-3	I:7117806-7121544	0.40467	0.162054	1.32027	1	1	no
taf-11.2	I:7132496-7134308	72.9239	66.0868	0.142031	0.3054	0.463682	no
xpa-1	I:7159722-7160750	73.1079	81.0654	-0.149059	0.3323	0.493391	no
K07G5.3	I:7161013-7166453	0.706829	0.805652	-0.188797	0.5739	0.711385	no
K07G5.5	I:7170023-7172187	7.14499	9.84942	-0.463106	0.07615	0.165687	no
M05B5.6	I:7183050-7185707	4.0374	5.22865	-0.373012	0.1671	0.298118	no
M05B5.3	I:7186624-7188256	3.38692	1.54216	1.13502	0.0008	0.00423906	yes
M05B5.4	I:7188492-7190560	28.4681	28.6223	-0.00779391	0.95965	0.977397	no
C01H6.4	I:7210540-7212577	6.38154	4.59351	0.474308	0.0711	0.157388	no
nhr-23	I:7214742-7221804	31.3678	30.0994	0.0595502	0.67155	0.789074	no
C01H6.6	I:7222463-7224133	10.8282	18.9001	-0.803608	0.0001	0.000701046	yes
tag-298	I:7224731-7227758	78.3483	90.1716	-0.202771	0.09825	0.200468	no
C01H6.8	I:7227861-7229430	14.9282	7.74459	0.946776	0.0012	0.00594559	yes
R06C7.1	I:7235381-7238787	229.979	226.617	0.021242	0.87265	0.922901	no
cpg-3	I:7244934-7246805	567.44	704.308	-0.311739	0.01805	0.0540588	no
bub-1	I:7251938-7255223	75.9242	69.8914	0.119445	0.34105	0.501311	no
ztf-15	I:7255508-7258698	38.8358	47.2382	-0.282566	0.03755	0.0958436	no
ztf-2	I:7291269-7293240	8.11472	0.980044	3.04962	5e-05	0.000377672	yes
srd-53	I:7294035-7295685	3.17988	0.977639	1.7016	0.0002	0.00127822	yes
F13G3.12	I:7295750-7296827	4.92504	5.92779	-0.267361	0.37755	0.536191	no
F13G3.7	I:7304915-7307004	45.9473	46.0973	-0.00470399	0.9734	0.984582	no
F13G3.11	I:7307114-7311937	81.0565	96.8301	-0.256528	0.0897	0.187415	no
F52A8.1	I:7317641-7321083	321.083	297.092	0.112037	0.4426	0.600354	no
glb-18	I:7339229-7352195	9.35511	8.65763	0.111783	0.9168	0.951311	no
F52A8.6	I:7339229-7352195	83.9454	103.221	-0.298213	0.18235	0.318431	no
F07A5.2	I:7352441-7353699	33.3796	8.8059	1.92243	5e-05	0.000377672	yes
F07A5.3	I:7354488-7357171	6.38319	12.0482	-0.916474	0.0003	0.00181567	yes
C15A11.2	I:7387353-7388713	3.62152	1.64798	1.1359	0.00695	0.0249459	yes
col-7	I:7401671-7402746	4.20864	0.388738	3.43648	5e-05	0.000377672	yes
C15A11.7	I:7405026-7408508	15.0855	22.0639	-0.548524	0.0057	0.021277	yes
unc-13	I:7422780-7454084	7.35697	4.95934	0.568964	0.0011	0.00552654	yes
spe-4	I:7454664-7456883	4.29148	2.2574	0.926815	0.0028	0.0119715	yes
asic-2	I:7480130-7483388	0.777726	0.730372	0.090631	0.8205	0.889669	no
T28F4.5	I:7492040-7494696	212.275	1276.32	-2.58799	5e-05	0.000377672	yes
pbrm-1	I:7495432-7505576	68.3238	62.0191	0.139675	0.3594	0.519	no
C26C6.6	I:7505967-7506642	3.50075	0.771694	2.18156	0.0031	0.0130442	yes
glb-8	I:7508716-7512488	1.55047	1.67802	-0.114061	0.7572	0.847143	no
goa-1	I:7522111-7526710	109.913	104.402	0.0742124	0.556	0.697331	no
nas-36	I:7527302-7531695	1.44062	1.01386	0.506829	0.12525	0.240646	no
C26C6.4	I:7532310-7535993	0.48231	0.937308	-0.958562	0.04715	0.114613	no
T25G3.1	I:7552969-7554475	71.3653	86.4052	-0.275895	0.077	0.167277	no
T25G3.3,chs-1	I:7554995-7562337	190.741	248.2	-0.379889	0.0098	0.0328564	yes
T25G3.4	I:7564578-7567711	77.0186	96.5519	-0.326098	0.0079	0.027641	yes
D2030.2	I:7574189-7580828	64.313	111.75	-0.797095	5e-05	0.000377672	yes
mce-1	I:7582100-7583344	80.0737	210.956	-1.39754	5e-05	0.000377672	yes
D2030.12	I:7583998-7585293	5.77108	6.73527	-0.222894	0.52005	0.667009	no
D2030.7	I:7588647-7590562	94.8395	100.798	-0.0878994	0.4883	0.641615	no
D2030.11	I:7590651-7591199	97.5492	113.265	-0.215503	0.21095	0.354977	no
D2030.8	I:7591293-7595193	54.6937	51.0069	0.100683	0.4407	0.598304	no
wdr-23	I:7596501-7602194	53.8234	65.2845	-0.278508	0.0324	0.0854883	no
aex-1	I:7602305-7608240	3.66463	4.63082	-0.337602	0.14985	0.275443	no
lrp-1	I:7614170-7634134	6.83856	7.10495	-0.0551323	0.6703	0.787966	no
F26A3.5	I:7668541-7669792	4.31605	1.08129	1.99696	5e-05	0.000377672	yes
T24B1.1	I:7676662-7679056	50.2542	49.8508	0.0116266	0.9289	0.958189	no
T23G11.7	I:7679448-7683022	75.2188	85.9729	-0.192788	0.16155	0.291047	no
rlbp-1	I:7683334-7694191	33.6168	48.0855	-0.516417	0.0009	0.00468201	yes
T23G11.4	I:7694336-7695215	83.4883	94.5245	-0.179115	0.22425	0.370044	no
gld-1	I:7695675-7698218	392.192	424.423	-0.113944	0.4376	0.595249	no
T23G11.10	I:7698295-7699032	0.411001	0.316606	0.376454	1	1	no
gna-2	I:7699539-7700957	226.302	253.659	-0.164638	0.188	0.325713	no
T23G11.11	I:7701146-7701384	67.094	92.3476	-0.460892	0.14075	0.263174	no
F27D4.1	I:7702423-7707051	229.792	206.568	0.153712	0.38235	0.540963	no
F27D4.4	I:7725011-7727107	138.171	130.797	0.0791293	0.5246	0.670835	no
tag-173	I:7727261-7729071	133.549	110.844	0.268837	0.03615	0.0930253	no
F27D4.8	I:7729196-7729798	187.812	277.056	-0.560891	0.0195	0.0575513	no
F27D4.6	I:7731143-7737988	4.91615	6.9697	-0.503568	0.0118	0.0383357	yes
F58H10.1	I:7755776-7756347	3.01272	1.88126	0.679365	0.1967	0.33681	no
adr-1	I:7773411-7777651	13.2806	14.8788	-0.163935	0.31095	0.469748	no
D2005.4	I:7813754-7819199	19.9367	20.6497	-0.0506971	0.7776	0.860593	no
D2005.7	I:7819572-7820483	125.629	129.676	-0.0457414	0.74065	0.836155	no
drh-3	I:7820836-7826373	32.768	27.9286	0.230546	0.08035	0.172752	no
F30F8.3	I:7835807-7836940	155.107	181.011	-0.222809	0.0788	0.170179	no
F30F8.9	I:7837056-7840014	60.8567	60.7573	0.00235712	0.98795	0.993041	no
F30F8.10	I:7840474-7846835	98.4003	113.83	-0.210145	0.1353	0.255714	no
taf-5	I:7848968-7853625	45.5635	55.6786	-0.289246	0.0259	0.0720125	no
apb-3	I:7853743-7859411	55.1859	66.5877	-0.270956	0.12545	0.24088	no
R11A5.4	I:7866125-7875554	363.132	730.439	-1.00827	5e-05	0.000377672	yes
F55D12.1	I:7884345-7885569	7.62924	6.26336	0.284602	0.4276	0.586044	no
F55D12.7	I:7887424-7887446	0	0	0	1	1	no
F55D12.2	I:7889349-7894849	7.88334	5.93849	0.40871	0.0651	0.146914	no
F55D12.6	I:7899036-7903777	9.81373	2.58484	1.92473	0.00085	0.00446105	yes
T22C1.1	I:7936216-7938480	78.2212	90.755	-0.214418	0.0992	0.202005	no
T22C1.3	I:7938553-7940108	75.9732	98.5852	-0.37588	0.0054	0.0203743	yes
T22C1.5	I:7940912-7941691	69.0617	87.2515	-0.337294	0.036	0.0927477	no
myosin	I:7942712-7945582	85.2074	109.417	-0.360792	0.00475	0.018344	yes
T22C1.9	I:7958696-7960003	8.19903	2.92827	1.48541	0.0001	0.000701046	yes
rbg-2	I:7962045-7972420	25.1637	31.4008	-0.319457	0.02485	0.0695954	no
H05L14.2	I:7980230-7993131	11.8374	13.9123	-0.233018	0.07525	0.164472	no
C54G4.5	I:7995750-7996663	11.6133	7.20103	0.6895	0.0373	0.0952686	no
C54G4.2	I:8006643-8009106	1.97069	0.6528	1.59399	0.00055	0.00307621	yes
C54G4.7,rskn-2	I:8014436-8024418	38.4318	56.6932	-0.560872	0.08265	0.176441	no
K04G2.2	I:8030952-8035690	98.2362	119.996	-0.288657	0.03875	0.0982717	no
K04G2.4	I:8035879-8038904	8.28443	2.84517	1.54189	0.1829	0.319102	no
K04G2.6	I:8040790-8043266	36.0125	44.6201	-0.309197	0.0186	0.0554366	no
K04G2.12	I:8043753-8044151	2.38245	4.32779	-0.861188	0.12345	0.238197	no
apr-1	I:8050036-8055459	38.3428	45.8357	-0.257514	0.0408	0.102392	no
K04G2.10	I:8057755-8060551	28.6419	21.8375	0.391323	0.04055	0.101881	no
rme-8	I:8083576-8095588	22.1701	25.9091	-0.224844	0.07335	0.161372	no
F18C12.3	I:8095733-8098417	45.596	44.0199	0.0507511	0.716	0.81846	no
spr-4	I:8103594-8109221	20.8324	24.9866	-0.262322	0.04555	0.11164	no
mau-2	I:8125794-8130077	42.4592	44.6318	-0.0719967	0.5907	0.725151	no
T28B8.1	I:8133884-8135033	65.9171	91.2309	-0.46887	0.00055	0.00307621	yes
ins-18	I:8147420-8149645	17.3493	20.5159	-0.241864	0.43355	0.591568	no
T28B8.6	I:8150342-8151311	6.95564	1.10188	2.65821	5e-05	0.000377672	yes
T28B8.3	I:8151978-8159726	1.31263	0.504551	1.37939	0.0106	0.0350355	yes
H31B20.2	I:8172713-8173482	0	0	0	1	1	no
H31B20.1	I:8174880-8176950	0.28694	0.0902018	1.66952	1	1	no
F08A10.1	I:8196051-8208733	7.30769	2.95201	1.30772	5e-05	0.000377672	yes
T02E1.6	I:8211103-8218317	7.62286	2.28074	1.74083	0.3184	0.478516	no
gla-3	I:8211103-8218317	69.7175	69.6236	0.00194416	0.99055	0.994422	no
T02E1.9	I:8224466-8224537	0	0	0	1	1	no
T02E1.8	I:8226501-8240630	5.03141	5.66118	-0.170138	0.7657	0.853054	no
ZK265.3	I:8242098-8243564	19.1729	5.97296	1.68255	5e-05	0.000377672	yes
ZK265.6	I:8255345-8256238	158.623	195.09	-0.298533	0.027	0.0744529	no
ZK265.7	I:8262031-8268957	5.88299	4.23285	0.474922	0.0865	0.182686	no
cutl-8	I:8270387-8273475	1.09448	0.23171	2.23986	0.0006	0.00331852	yes
T01G9.1	I:8274004-8288118	3.16843	1.89267	0.743343	0.5615	0.701488	no
T01G9.3	I:8274004-8288118	2.69071	3.74409	-0.476625	0.52025	0.66721	no
mei-1	I:8294870-8296905	120.806	136.226	-0.17331	0.16795	0.299149	no
cep-1	I:8324111-8328844	46.3099	46.0605	0.00779178	0.95345	0.973154	no
C34B7.1	I:8330543-8332711	2.66317	3.86299	-0.536572	0.07135	0.157851	no
mys-4	I:8333145-8336013	32.9128	34.8473	-0.0823958	0.5703	0.708461	no
C34B7.2	I:8336973-8346015	34.1359	35.4845	-0.0559021	0.679	0.794073	no
tba-5	I:8353402-8357821	1.35045	0.991525	0.445724	0.2402	0.390015	no
F16D3.6	I:8375482-8392731	0.0299894	0.0802341	-1.41976	1	1	no
ser-5	I:8375482-8392731	2.28709	2.44158	-0.094304	0.90775	0.945167	no
ngp-1	I:8394720-8398614	64.0637	112.319	-0.810028	5e-05	0.000377672	yes
T19A6.3,T19A6.4	I:8398910-8403822	127.72	139.088	-0.123023	0.35945	0.519	no
F02E9.1	I:8406918-8407582	118.287	131.579	-0.153637	0.3395	0.50013	no
F02E9.7	I:8413252-8416122	57.0674	65.3356	-0.195204	0.1535	0.280612	no
sin-3	I:8416824-8426077	45.1099	55.2041	-0.291331	0.0431	0.107066	no
sod-2	I:8429927-8435858	189.118	179.622	0.0743184	0.7061	0.811962	no
unc-120	I:8460217-8463007	14.0223	11.6471	0.267751	0.2188	0.364367	no
D1081.5	I:8481206-8482434	5.01006	1.04594	2.26003	5e-05	0.000377672	yes
D1081.7	I:8487612-8490929	149.711	148.245	0.0141913	0.9117	0.947858	no
D1081.8	I:8491283-8495831	99.6973	108.732	-0.125153	0.314	0.473474	no
axl-1	I:8513893-8526614	7.85792	3.6522	1.10538	0.22225	0.367965	no
K02B12.6	I:8513893-8526614	0.924079	0.338656	1.4482	0.308	0.466526	no
K02B12.9	I:8513893-8526614	3.18526	1.87811	0.762131	0.57735	0.714454	no
ran-4	I:8591204-8591969	352.849	311.614	0.179293	0.15845	0.287039	no
R05D11.5	I:8592084-8592919	127.92	123.25	0.0536534	0.70265	0.810232	no
R05D11.9	I:8593019-8596214	64.8532	70.0771	-0.111765	0.3778	0.536348	no
R05D11.6	I:8596325-8598544	83.5919	104.476	-0.321739	0.01505	0.0466986	yes
R05D11.4	I:8598650-8601094	38.2984	42.6767	-0.156164	0.2524	0.403615	no
R05D11.7	I:8601350-8601999	126.602	128.874	-0.0256555	0.8586	0.913749	no
edc-3	I:8602117-8605156	92.6635	89.8969	0.0437292	0.7254	0.825653	no
F43G9.13	I:8605253-8608626	113.576	118.132	-0.0567354	0.8946	0.936526	no
F43G9.2	I:8609923-8612578	77.547	96.0782	-0.309138	0.0973	0.19903	no
F43G9.5	I:8615380-8616346	116.16	108.827	0.0940673	0.48675	0.640233	no
F43G9.8	I:8617392-8618882	1.69722	0.532288	1.6729	0.00275	0.0117904	yes
ces-1	I:8633941-8636037	0.628136	0.818971	-0.382736	0.4799	0.634473	no
F43G9.12	I:8640519-8644392	38.314	44.518	-0.216516	0.0941	0.193823	no
VF39H2L.1	I:8644467-8646179	53.7034	59.3964	-0.145361	0.33885	0.499554	no
sig-7	I:8646443-8651770	60.0961	70.7662	-0.235789	0.0854	0.180809	no
flp-22	I:8658891-8659960	74.7525	78.3869	-0.0684903	0.71495	0.817806	no
F39H2.5	I:8660812-8664136	36.1581	41.1538	-0.186707	0.2862	0.4422	no
F39H2.3	I:8664945-8666490	86.8211	82.4078	0.0752647	0.5808	0.717226	no
K07A12.1	I:8666587-8669776	71.0018	76.4521	-0.106701	0.4014	0.56015	no
asg-1	I:8692936-8693462	659.219	629.466	0.0666299	0.59035	0.724952	no
F39H11.1	I:8696595-8701964	141.027	165.771	-0.233217	0.2177	0.362967	no
cdk-8	I:8702470-8724272	47.2939	53.229	-0.170559	0.2837	0.439218	no
rpb-3	I:8728761-8729957	198.272	219.096	-0.144078	0.25315	0.404436	no
C36B1.14	I:8730151-8730914	110.594	124.216	-0.167586	0.3143	0.47374	no
C36B1.6	I:8732238-8733427	6.52871	35.8833	-2.45844	5e-05	0.000377672	yes
dhfr-1	I:8736211-8736916	207.563	199.736	0.0554513	0.67885	0.794018	no
C36B1.8	I:8737064-8742529	41.4198	39.3982	0.0721904	0.5737	0.711256	no
imp-1	I:8752228-8755671	163.332	162.895	0.00386921	0.97615	0.986313	no
lmn-1	I:8762980-8765626	195.445	150.276	0.379143	0.00215	0.00957773	yes
trt-1	I:8768317-8771178	47.7132	68.2443	-0.51632	0.00015	0.00100493	yes
sup-17	I:8792957-8797277	62.3459	59.4009	0.0698084	0.5729	0.71066	no
F36A2.3	I:8798777-8801650	37.7419	35.477	0.0892847	0.5846	0.720072	no
F36A2.8	I:8808767-8813243	141.615	192.938	-0.446158	0.0054	0.0203743	yes
F36A2.7	I:8813751-8814977	1024.33	1387.35	-0.437644	0.00085	0.00446105	yes
phospholipase	I:8816973-8821350	74.0719	78.1432	-0.077195	0.55645	0.697668	no
F36A2.11	I:8822280-8823599	4.45893	1.19748	1.8967	0.00015	0.00100493	yes
F29D10.1	I:8840625-8841120	3.14377	1.58942	0.983994	0.05185	0.123277	no
F29D10.2	I:8841761-8842315	0.554584	0.186756	1.57025	1	1	no
F55H12.2	I:8867938-8868286	161.911	35.9446	2.17136	5e-05	0.000377672	yes
F55H12.5	I:8869706-8871468	8.9042	3.02324	1.55839	5e-05	0.000377672	yes
snf-2	I:8871830-8875245	1.19601	0.223309	2.42111	5e-05	0.000377672	yes
F55H12.3	I:8876076-8893043	2.05542	4.51009	-1.13372	5e-05	0.000377672	yes
T08G11.3	I:8921181-8925078	0.99605	0.351274	1.50362	0.00165	0.00771619	yes
tsp-15	I:8928747-8942250	12.1258	13.371	-0.141027	0.6153	0.74514	no
F53B6.7	I:8948772-8954344	7.0182	3.45402	1.02282	0.0011	0.00552654	yes
F53B6.5	I:8948772-8954344	0.0911755	0.0356733	1.3538	1	1	no
gei-11	I:8962313-8966110	41.885	45.9036	-0.132172	0.30175	0.459771	no
mdt-31	I:8966305-8966954	68.7209	87.6204	-0.350518	0.0645	0.145773	no
F32H2.10	I:8970306-8970965	96.6313	107.382	-0.152183	0.3544	0.514262	no
thoc-3	I:8971130-8972954	79.742	112.313	-0.494118	5e-05	0.000377672	yes
glycosyltransferase	I:8990809-8993453	0.117309	0.0512882	1.19362	1	1	no
tba-6	I:8993993-8998585	0.648117	0.737019	-0.185446	0.85975	0.914647	no
F36F2.2	I:9016788-9017986	22.9643	55.5033	-1.27318	5e-05	0.000377672	yes
F36F2.1	I:9018716-9020294	25.6414	21.7001	0.240775	0.31705	0.477325	no
tax-2	I:9020936-9025545	0.617262	0.424473	0.54021	0.16635	0.297158	no
C31H5.1	I:9025847-9031224	0.130684	0.536826	-2.03837	0.01355	0.0428995	yes
C31H5.7	I:9041365-9041963	2.12553	3.89967	-0.875531	0.0625	0.142045	no
W06D4.2	I:9056288-9057814	11.1839	3.27783	1.77061	5e-05	0.000377672	yes
W06D4.3	I:9058880-9060446	2.46301	1.29319	0.929487	0.02205	0.0632127	no
rad-54	I:9065078-9075069	20.4392	21.2402	-0.0554636	0.7888	0.86787	no
mef-2	I:9095948-9100050	12.7581	8.57936	0.572474	0.0207	0.0602278	no
ZK858.1	I:9118106-9121753	52.7735	48.6381	0.117727	0.35425	0.51419	no
ZK858.8	I:9124719-9126078	6.31953	2.76102	1.19462	0.001	0.00510063	yes
mel-26	I:9132529-9135741	170.141	194.581	-0.193643	0.12205	0.236324	no
H32K16.1	I:9149708-9153067	4.28322	4.3127	-0.00989682	0.971	0.983108	no
F25H5.7	I:9155530-9157403	1.67452	0.601721	1.47658	0.00045	0.00257771	yes
F25H5.10	I:9158792-9158978	51.0282	70.7131	-0.470682	0.32775	0.488282	no
eft-2	I:9163522-9166944	1312.98	1673	-0.349586	0.1715	0.303613	no
F25H5.3	I:9168423-9177467	268.161	247.442	0.116009	0.36505	0.524187	no
F25H5.9	I:9168423-9177467	0	0	0	1	1	no
gip-2	I:9226934-9228045	37.7727	51.5991	-0.450002	0.00965	0.0324524	yes
C45G3.5	I:9228154-9233549	50.5257	62.2068	-0.300055	0.0608	0.139208	no
prom-1	I:9287437-9289756	43.6969	49.9066	-0.191699	0.14945	0.275003	no
rab-5	I:9308427-9310212	242.598	272.594	-0.168184	0.1798	0.314977	no
uev-3	I:9310319-9312595	35.9446	54.1561	-0.59135	0.00015	0.00100493	yes
F26H9.8	I:9317726-9327203	0.536976	0.182085	1.56024	0.25215	0.403299	no
C12C8.2	I:9327847-9330887	28.3171	14.5511	0.960551	5e-05	0.000377672	yes
C12C8.4	I:9332996-9333018	0	0	0	1	1	no
dyf-5	I:9359065-9363944	1.32927	1.55859	-0.229608	0.53285	0.678296	no
M04C9.8	I:9359065-9363944	0	0	0	1	1	no
C17E4.2	I:9410605-9416694	13.7949	14.4875	-0.0706728	0.6682	0.786097	no
C17E4.4	I:9419414-9421984	58.4252	99.8367	-0.772979	0.05185	0.123277	no
C17E4.6	I:9422547-9431104	63.2225	65.3673	-0.0481302	0.71005	0.814074	no
C17E4.9	I:9431240-9433817	159.641	149.014	0.0993846	0.4318	0.589963	no
C17E4.10	I:9435368-9450723	95.0285	108.651	-0.19327	0.22455	0.37038	no
F46A9.1	I:9457807-9458839	5.69019	2.29144	1.31222	0.00295	0.0125018	yes
F46A9.2	I:9459294-9460510	3.36022	1.29	1.38119	0.00505	0.0192708	yes
twk-29	I:9463751-9468844	4.46901	2.39522	0.899796	0.00365	0.0148163	yes
skr-2	I:9469680-9470624	278.301	309.745	-0.154434	0.2158	0.360814	no
skr-1	I:9470759-9475160	210.913	246.979	-0.227738	0.0755	0.164831	no
F30A10.14	I:9476595-9477080	19.9998	35.204	-0.815755	0.0033	0.0136914	yes
F30A10.11	I:9477468-9478089	8.48077	1.14954	2.88314	0.01785	0.053543	no
F30A10.12	I:9481699-9482226	7.95494	1.39577	2.51079	0.00015	0.00100493	yes
acetylglucosaminyltransferase	I:9483800-9486531	0.20722	0.0677146	1.61363	1	1	no
F30A10.6	I:9488478-9492614	101.568	138.376	-0.44615	0.0005	0.00282734	yes
stn-1	I:9501258-9505759	13.9997	11.0576	0.340364	0.32395	0.484777	no
F30A10.10	I:9506543-9511175	40.6488	42.6242	-0.0684613	0.5887	0.723791	no
klp-16	I:9512442-9514746	95.0617	113.724	-0.2586	0.04095	0.102685	no
set-32	I:9519248-9521181	17.8932	17.9334	-0.00323984	0.98595	0.992181	no
ahr-1	I:9522568-9532822	1.55994	0.915977	0.768103	0.20365	0.345637	no
C36F7.2	I:9544738-9558087	51.4551	49.5666	0.0539471	0.7247	0.82534	no
F42H11.1	I:9576347-9577880	0.0415726	0	#NAME?	1	1	no
dut-1	I:9585307-9588119	278.331	281.242	-0.0150112	0.90645	0.944707	no
K07A1.5	I:9590585-9591773	3.0307	0.906294	1.7416	5e-05	0.000377672	yes
K07A1.14	I:9604200-9605179	0	0	0	1	1	no
aqp-9	I:9606252-9611589	14.2806	11.999	0.251142	0.75685	0.847103	no
T05F1.1	I:9620223-9622361	139.99	132.799	0.0760802	0.54285	0.686031	no
T05F1.2	I:9622538-9624881	181.506	192.723	-0.0865094	0.4929	0.644854	no
hsr-9	I:9626252-9631162	80.2901	87.1067	-0.117562	0.3452	0.50529	no
T05F1.4	I:9631381-9632393	79.5384	99.5743	-0.324121	0.01775	0.0533261	no
T05F1.8	I:9642360-9643784	5.75479	2.00014	1.52466	5e-05	0.000377672	yes
T05F1.9	I:9645688-9647595	1.21339	2.31782	-0.933725	0.0175	0.0527602	no
T05F1.13	I:9650556-9652804	8.57328	11.4908	-0.422558	0.0846	0.179436	no
T05F1.11	I:9653090-9656290	2.72696	9.26249	-1.76411	5e-05	0.000377672	yes
asfl-1	I:9658263-9660063	93.1614	102.163	-0.133065	0.3219	0.482506	no
cel-1	I:9665244-9670705	42.2801	48.147	-0.187469	0.33885	0.499554	no
rpl-24.2	I:9665244-9670705	200.383	316.269	-0.658393	0.00035	0.00207829	yes
ikb-1	I:9685471-9688634	6.69146	12.5387	-0.905995	5e-05	0.000377672	yes
rpl-14	I:9689174-9690066	5244.67	5071.05	0.0485687	0.7662	0.853185	no
eat-16	I:9715317-9728098	18.1995	13.3689	0.445022	0.14405	0.267365	no
ceh-5	I:9715317-9728098	1.49944	2.28344	-0.606784	0.68395	0.797321	no
gfi-2	I:9737812-9744132	93.2294	97.6382	-0.0666617	0.59035	0.724952	no
K02A11.2	I:9744231-9745958	2.14278	1.31791	0.701226	0.1067	0.213248	no
sur-6	I:9754111-9760775	109.472	135.128	-0.303766	0.0147	0.0458434	yes
F26E4.6	I:9773159-9774006	1232.37	1202.2	0.0357564	0.77505	0.858622	no
fasciclin	I:9774196-9779520	4.73024	8.50891	-0.84706	0.00015	0.00100493	yes
F26E4.12	I:9780338-9785712	46.6692	32.2177	0.534618	0.2071	0.350228	no
cco-1	I:9788738-9789948	765.5	844.744	-0.142112	0.26555	0.419162	no
hrdl-1	I:9793746-9796665	91.1973	124.241	-0.446078	0.0003	0.00181567	yes
ncx-4	I:9808893-9815887	6.20363	3.17528	0.966229	0.02745	0.0753567	no
nhr-62	I:9839587-9844799	2.94461	3.86944	-0.394049	0.15785	0.28639	no
zig-1	I:9847396-9851783	16.3771	15.0442	0.122468	0.8358	0.900241	no
K10C3.4	I:9860492-9862289	54.5283	50.5588	0.109042	0.45555	0.612474	no
K10C3.5	I:9863588-9869040	31.6689	41.7988	-0.400395	0.0028	0.0119715	yes
nhr-49	I:9869652-9874666	65.7226	78.0438	-0.247895	0.0501	0.120229	no
inx-20	I:9876517-9879109	1.45892	1.0086	0.532552	0.1542	0.281449	no
nas-5	I:9886189-9888144	2.0786	3.95915	-0.929579	0.0035	0.0143473	yes
lsl-1	I:9901268-9902870	101.271	119.287	-0.236209	0.0717	0.158489	no
F52F12.8	I:9923651-9924237	8.06288	2.08646	1.95024	0.001	0.00510063	yes
F52F12.9	I:9926547-9928807	0.554316	0.18748	1.56397	0.0208	0.0604275	no
F52F12.7	I:9928968-9930875	138.798	168.834	-0.282622	0.02715	0.0747061	no
Y106G6A.4	I:9930966-9931858	25.7018	9.03372	1.50848	5e-05	0.000377672	yes
sqv-5	I:9947828-9953373	88.6878	97.6148	-0.138365	0.2634	0.416323	no
mom-5	I:9965576-9969402	75.257	83.7758	-0.154706	0.22635	0.372432	no
his-68	I:9989089-9989604	60.6959	43.607	0.47704	0.0152	0.0470693	yes
T23D8.7	I:9989790-9993580	53.1006	55.984	-0.0762852	0.54825	0.691155	no
C03C11.1	I:10014724-10015426	9.23822	2.12011	2.12348	5e-05	0.000377672	yes
fog-3	I:10016766-10018026	1.70576	0.829101	1.04079	0.02	0.058701	no
eak-6	I:10023798-10025527	0.517794	0.171609	1.59325	0.24535	0.395872	no
npp-17	I:10026629-10030047	106.691	136.63	-0.356844	0.00415	0.0164431	yes
F10G8.6,F10G8.7	I:10030160-10048016	157.862	183.172	-0.214537	0.3598	0.519262	no
F10G8.9	I:10048074-10061997	23.0535	41.8338	-0.859685	0.0003	0.00181567	yes
B0379.1	I:10074956-10077733	42.0932	53.2461	-0.339087	0.05755	0.133472	no
mut-16	I:10080146-10085692	42.3532	39.2407	0.110117	0.3909	0.549328	no
B0379.6	I:10086521-10102000	0	0	0	1	1	no
Y106G6D.2	I:10110992-10111839	11.2373	4.33234	1.37507	5e-05	0.000377672	yes
Y106G6D.4	I:10114780-10116546	2.66714	1.59474	0.741972	0.02715	0.0747061	no
Y106G6D.8	I:10117049-10122091	39.3531	40.6669	-0.0473759	0.89975	0.939938	no
Y106G6D.7	I:10122459-10130194	29.0309	24.0274	0.272911	0.0377	0.0960991	no
F16C3.1	I:10147365-10149877	3.60285	2.97155	0.277921	0.37545	0.534835	no
F16C3.3	I:10155272-10158186	1.79948	2.11844	-0.235424	0.49	0.642916	no
F16C3.4	I:10158942-10161872	3.24914	0.835513	1.95932	0.2775	0.432356	no
C25A1.1	I:10162377-10165115	118.078	130.211	-0.141111	0.28755	0.443974	no
C25A1.5	I:10177169-10178910	155.72	245.81	-0.658589	5e-05	0.000377672	yes
C25A1.6	I:10178992-10179730	396.519	464.222	-0.227426	0.0707	0.15666	no
irs-2	I:10179828-10183986	35.1988	38.6469	-0.134825	0.29535	0.452827	no
rsa-1	I:10185788-10190885	164.963	200.282	-0.279889	0.16915	0.300557	no
C25A1.13	I:10193230-10193895	102.751	115.468	-0.168351	0.27505	0.429842	no
C25A1.15	I:10197309-10197585	0	0	0	1	1	no
lin-11	I:10248277-10255317	3.38076	4.38292	-0.374543	0.16575	0.29643	no
T20F10.2	I:10298204-10300577	37.7539	32.5776	0.212745	0.24425	0.394636	no
dlc-6	I:10323605-10327747	0.908651	0.193068	2.23462	0.37435	0.534058	no
Y106G6G.1	I:10329016-10330360	4.1792	2.04993	1.02766	0.0012	0.00594559	yes
rps-7	I:10330861-10331737	4860.5	4957.98	-0.0286473	0.88795	0.932744	no
aph-2,ers-2	I:10336384-10345638	77.5116	88.4917	-0.19113	0.1612	0.290586	no
ZC434.7	I:10345727-10347988	41.2895	40.712	0.0203179	0.88115	0.928364	no
carboxypeptidase	I:10356300-10360877	13.1983	7.50732	0.813983	0.0002	0.00127822	yes
sptf-1	I:10366610-10371673	2.70949	4.48346	-0.72659	0.0212	0.0612776	no
F45H11.3	I:10374803-10380738	27.5308	28.4792	-0.0488619	0.72705	0.826533	no
F45H11.5	I:10381071-10381965	87.5841	92.322	-0.0760056	0.73	0.828624	no
tag-353	I:10401056-10402930	129.841	135.084	-0.0571139	0.64985	0.771935	no
blmp-1	I:10409348-10413836	5.03617	2.10952	1.25541	5e-05	0.000377672	yes
Y106G6H.1	I:10429661-10432316	14.9272	6.80298	1.13371	5e-05	0.000377672	yes
rpl-30	I:10436253-10436868	4666.53	4753.33	-0.0265886	0.85165	0.909682	no
sec-8	I:10446667-10452062	33.4011	39.2027	-0.231054	0.081	0.173786	no
Y106G6H.8	I:10452168-10452858	119.333	121.399	-0.024767	0.8773	0.925849	no
Y106G6H.13	I:10471204-10471947	41.1976	12.4883	1.72198	5e-05	0.000377672	yes
Y106G6H.16	I:10474845-10475488	51.8414	64.1596	-0.307559	0.13735	0.258447	no
F37D6.3	I:10486704-10487313	1.33097	2.50434	-0.911949	0.05575	0.130298	no
F37D6.4	I:10488638-10488980	3.25083	0.295828	3.45798	0.0191	0.0566093	no
tag-68	I:10501588-10505435	3.34633	2.30146	0.540032	0.07865	0.169951	no
F59C6.8	I:10507081-10515495	1.41794	1.23271	0.201961	0.79815	0.873921	no
F59C6.16	I:10507081-10515495	666.469	943.211	-0.501042	0.01635	0.0500173	no
exos-3	I:10518365-10519251	115.779	123.907	-0.0978897	0.46735	0.623174	no
F59C6.5	I:10519346-10520749	286.461	390.987	-0.448784	0.00045	0.00257771	yes
F59C6.12	I:10520859-10521953	14.6562	28.9581	-0.982462	0.0003	0.00181567	yes
F59C6.2	I:10522140-10523894	2.53014	1.30849	0.951319	0.0177	0.0532278	no
F59C6.3	I:10524447-10525475	4.36875	1.7199	1.3449	0.00225	0.00994557	yes
F59C6.14	I:10526598-10530024	13.5754	18.8844	-0.476201	0.13075	0.248793	no
F59C6.11	I:10532655-10534462	5.77639	18.52	-1.68084	5e-05	0.000377672	yes
F25H2.2	I:10543012-10546414	15.4328	14.682	0.0719497	0.68425	0.797489	no
F25H2.3	I:10547685-10549598	0.253917	0.18135	0.485585	1	1	no
F25H2.4	I:10551967-10552959	193.603	220.945	-0.190586	0.1498	0.275384	no
F25H2.6	I:10554354-10557811	63.7915	67.9377	-0.0908471	0.47575	0.630284	no
glycosyltransferase	I:10558355-10559778	24.9525	31.0635	-0.316034	0.0941	0.193823	no
ubc-25	I:10562956-10564903	192.602	248.175	-0.365738	0.00365	0.0148163	yes
F25H2.15	I:10565254-10565432	5.76046	0	#NAME?	1	1	no
pas-5	I:10566338-10567289	360.533	338.788	0.0897491	0.47465	0.629368	no
rpa-0	I:10567880-10569008	3976.95	4243.24	-0.0935044	0.6937	0.803943	no
F25H2.12,tct-1	I:10569096-10571893	2559.47	2274.06	0.170571	0.2923	0.449237	no
F25H2.14	I:10569096-10571893	8.44941	8.18671	0.0455672	0.9699	0.982866	no
rtel-1	I:10572017-10577113	28.8886	32.9825	-0.1912	0.1486	0.273831	no
F29C6.1	I:10579401-10580879	31.8514	63.9972	-1.00665	5e-05	0.000377672	yes
lst-1	I:10588165-10590436	116.27	104.334	0.156273	0.22405	0.369872	no
set-18	I:10590708-10593951	17.1916	18.345	-0.0936891	0.6163	0.745765	no
T22A3.6	I:10594462-10598446	0.782504	0.269883	1.53577	0.0016	0.00753036	yes
pash-1	I:10598698-10606602	36.6285	31.7183	0.207652	0.119	0.231817	no
T22A3.9	I:10598698-10606602	0	0	0	1	1	no
lam-3	I:10608454-10621417	1.1067	2.83285	-1.35599	5e-05	0.000377672	yes
C43H8.2	I:10622940-10624350	62.6139	68.3886	-0.127272	0.35155	0.511813	no
C43H8.1,helicase	I:10624452-10628376	99.4739	198.724	-0.998379	5e-05	0.000377672	yes
cutl-14	I:10628731-10631662	1.62386	3.22488	-0.989821	0.00615	0.0226441	yes
tag-344	I:10644272-10645561	2.09655	0.483632	2.11604	0.00015	0.00100493	yes
fbxa-125	I:10646750-10647766	1.48395	0.231014	2.68339	0.00135	0.00656426	yes
B0511.2	I:10651018-10652951	5.09227	5.38685	-0.0811318	0.7751	0.858622	no
fkb-7	I:10667943-10670959	3.67547	7.07787	-0.945386	0.00185	0.00846397	yes
C34B2.3	I:10672762-10674847	2.88929	0.751415	1.94303	5e-05	0.000377672	yes
kbp-5	I:10687353-10688049	191.515	200.12	-0.0634144	0.63345	0.758005	no
tag-272	I:10688320-10690759	3.53451	0.948432	1.89789	0.0336	0.0878721	no
C34B2.11	I:10691333-10696772	10.1938	6.78986	0.586239	0.0357	0.0921134	no
B0205.10	I:10708351-10710353	13.9676	3.63898	1.94047	5e-05	0.000377672	yes
B0205.9	I:10720814-10723471	49.3435	46.3983	0.0887892	0.50025	0.65022	no
B0205.14	I:10726906-10727318	10.6743	4.43415	1.26742	0.0737	0.161957	no
B0205.12	I:10730463-10730666	225.143	214.916	0.0670683	0.89915	0.939641	no
kin-3	I:10734010-10736598	220.014	289.023	-0.393591	0.00185	0.00846397	yes
aminotransferase	I:10736685-10739900	48.8697	48.5444	0.00963313	0.9468	0.969578	no
B0205.5	I:10740206-10740579	1.03384	1.16283	-0.169621	1	1	no
daf-16	I:10750558-10776689	81.0751	94.8625	-0.226578	0.07475	0.163704	no
F55A3.3	I:10789118-10793136	108.311	118.669	-0.131769	0.2902	0.446901	no
F55A3.2	I:10793389-10798030	19.5921	20.4647	-0.0628651	0.6767	0.792466	no
C35E7.9,marc-6	I:10799611-10808213	38.1353	44.9463	-0.237076	0.0587	0.135608	no
C35E7.8	I:10808595-10810373	17.0066	20.3184	-0.256696	0.2166	0.361759	no
C35E7.7	I:10813803-10814876	5.68275	2.55055	1.15578	0.01635	0.0500173	no
C35E7.6	I:10817348-10819098	4.49926	4.9934	-0.150333	0.6063	0.737195	no
C35E7.5	I:10823346-10828443	10.1796	10.9267	-0.102183	0.5181	0.665228	no
C35E7.4	I:10831889-10834801	4.58355	5.53813	-0.272934	0.2504	0.401329	no
C35E7.3	I:10836974-10838866	2.27199	1.36687	0.733081	0.0292	0.07909	no
C35E7.2	I:10841102-10844636	3.98104	2.92756	0.443448	0.0857	0.181369	no
C35E7.11	I:10844760-10845911	14.2199	11.0229	0.367412	0.17635	0.310043	no
C35E7.1	I:10846766-10850094	10.2697	5.48447	0.90497	0.0001	0.000701046	yes
Y37F4.2	I:10855927-10857613	0.992283	0.353007	1.49105	1	1	no
Y37F4.1	I:10859540-10860762	4.49169	1.91458	1.23023	0.00185	0.00846397	yes
bath-25	I:10876201-10879565	0.102299	0.760891	-2.8949	0.1203	0.233758	no
T27C10.8	I:10879765-10894230	12.4756	4.5473	1.45602	0.1931	0.331936	no
mop-25.3	I:10879765-10894230	32.9412	39.4856	-0.261434	0.2628	0.415673	no
srt-62	I:10899102-10901719	0.102351	0.189487	-0.888576	1	1	no
srt-61	I:10904362-10906520	0.207243	0.216936	-0.0659455	1	1	no
F49D11.4	I:10913189-10915606	0.047177	0.0813826	-0.786636	1	1	no
F49D11.3	I:10917056-10919085	0.20699	0.566635	-1.45286	0.19255	0.331287	no
F49D11.2	I:10921408-10923477	0.412298	0.229616	0.844465	1	1	no
prp-17	I:10936813-10940539	67.2038	70.1642	-0.062191	0.61715	0.746266	no
Y95D11A.3	I:10940677-10942897	64.3351	68.3502	-0.0873405	0.5804	0.716904	no
Y95D11A.1	I:10944202-10945683	73.2417	74.0707	-0.0162373	0.93075	0.959326	no
Y52B11A.3	I:10970485-11004276	33.9527	33.3427	0.0261559	0.861	0.915471	no
clec-92	I:11015478-11017490	5.33056	0.49314	3.43422	5e-05	0.000377672	yes
Y52B11A.8	I:11032333-11034046	143.431	141.367	0.0209197	0.8729	0.923028	no
Y52B11A.10	I:11039048-11052465	16.5539	24.9827	-0.593762	0.0002	0.00127822	yes
Y52B11B.1	I:11075750-11134660	4.15821	0	#NAME?	0.11295	0.222877	no
clec-93	I:11142105-11144083	0.0660596	0.0253147	1.38379	1	1	no
ZK39.9	I:11144644-11145689	0	0	0	1	1	no
clec-94	I:11146439-11148301	10.4614	0.204804	5.67468	0.00175	0.00808811	yes
clec-95	I:11148964-11150287	4.82816	0.428291	3.49481	0.0021	0.00942309	yes
clec-96	I:11151232-11151931	1.06987	0.03466	4.94803	0.03115	0.0829285	no
clec-97	I:11152705-11155361	11.724	7.00424	0.743167	0.0175	0.0527602	no
ZK39.10	I:11160039-11162558	1.65789	0.823068	1.01027	0.0579	0.134082	no
sri-5	I:11182808-11186129	0.557066	0.453322	0.297311	0.5209	0.667599	no
ztf-6	I:11206913-11211899	28.9607	21.6535	0.4195	0.00435	0.0170254	yes
Y53H1A.2	I:11222390-11224154	160.283	173.897	-0.117614	0.7822	0.864194	no
nfya-2	I:11224827-11233326	42.3149	42.7581	-0.0150338	0.9271	0.957101	no
scrm-6	I:11253341-11255875	2.33994	0.742324	1.65635	0.00035	0.00207829	yes
F36D1.7	I:11263139-11263652	23.2991	57.3676	-1.29996	5e-05	0.000377672	yes
F36D1.5	I:11266061-11266426	0	0	0	1	1	no
F36D1.10	I:11268021-11268401	0	0	0	1	1	no
F36D1.4	I:11271699-11272338	33.2036	8.86245	1.90556	0.02555	0.0711935	no
sru-47	I:11289035-11291860	0.209156	0.104778	0.997241	1	1	no
Y53H1B.4	I:11300734-11301654	0.126754	0.185575	-0.549972	1	1	no
Y53H1B.6	I:11303730-11305210	0	0	0	1	1	no
cdk-9	I:11323518-11333132	33.3323	39.7314	-0.253359	0.0814	0.174328	no
pes-2.1	I:11355227-11356362	0.0139001	0	#NAME?	1	1	no
F56G4.4	I:11374615-11380109	56.4587	57.9707	-0.0381301	0.7755	0.858818	no
png-1	I:11380228-11388679	24.0967	26.8223	-0.1546	0.3022	0.46032	no
Y53H1C.3	I:11417873-11421227	0.407014	0.153951	1.4026	1	1	no
C27C7.7	I:11422180-11423591	0.820595	0.688196	0.253852	0.5584	0.698975	no
nhr-74	I:11429061-11432054	1.56441	0.0288054	5.76314	0.1125	0.222131	no
nhr-259	I:11436771-11437397	0.0331683	0	#NAME?	1	1	no
C27C7.1	I:11439277-11440665	116.64	95.3019	0.291491	0.025	0.0699138	no
nhr-244	I:11454769-11455440	0	0	0	1	1	no
ZK1025.7	I:11465131-11467582	6.0908	0.0243422	7.96703	0.0592	0.136416	no
ZK1025.8	I:11469451-11471574	0.0145413	0	#NAME?	1	1	no
nhr-245	I:11477821-11479937	0	0	0	1	1	no
K08C9.5	I:11483381-11484561	1.28067	0.695208	0.881381	0.06885	0.153399	no
F32B4.8	I:11501614-11507120	0.720294	0.405562	0.828665	0.02375	0.0671616	no
F32B4.1	I:11510056-11512760	0.333461	0.49042	-0.556497	1	1	no
F32B4.6	I:11515117-11517099	0.480269	0.077095	2.63913	1	1	no
F32B4.4	I:11517662-11526552	18.0415	16.2534	0.150572	0.36205	0.521386	no
F15D3.9	I:11557975-11558635	2.3071	1.63419	0.497501	0.4628	0.619304	no
col-66	I:11559435-11560555	0.0381509	0	#NAME?	1	1	no
F15D3.4	I:11565227-11570793	1.08306	0.824599	0.393344	0.2518	0.402902	no
F15D3.7	I:11578630-11579584	160.538	211.303	-0.396397	0.00215	0.00957773	yes
C17D12.5	I:11586225-11587284	4.58271	1.0484	2.12801	0.0026	0.0112633	yes
unc-75	I:11592291-11601595	1.90298	1.11387	0.772678	0.02625	0.0728279	no
C17D12.8	I:11604600-11611291	0	22.5636	#VALUE!	1	1	no
C17D12.1	I:11611661-11616129	74.1216	69.1884	0.099363	0.4929	0.644854	no
Y47H9A.1	I:11623104-11626552	0	0	0	1	1	no
W04G5.3	I:11629630-11629922	2.15847	0.978371	1.14156	1	1	no
W04G5.4	I:11630053-11632837	0.422867	0.3212	0.396733	1	1	no
W04G5.5	I:11634602-11636832	0.220466	0.0621863	1.82588	1	1	no
W04G5.9	I:11642614-11645410	0.128169	0.0271813	2.23736	1	1	no
W04G5.11	I:11649492-11649677	0	0	0	1	1	no
W04G5.8	I:11649971-11651815	0.734862	0.42951	0.774783	0.08685	0.183099	no
W04G5.7	I:11652778-11654244	0.051225	0.0144152	1.82926	1	1	no
kpc-1	I:11675930-11682354	13.1547	22.2935	-0.761043	5e-05	0.000377672	yes
sri-12	I:11699158-11701168	0.0376036	0.0195592	0.943025	1	1	no
T22H2.6	I:11701620-11703672	36.4478	47.6151	-0.385586	0.01085	0.0357621	yes
F35E2.8	I:11718900-11719780	0.935758	0.495456	0.917378	0.0896	0.187308	no
Y47H9B.2	I:11744161-11747404	2.73739	0.645309	2.08474	0.00035	0.00207829	yes
T02G6.3	I:11808931-11814863	0.211874	0.101826	1.0571	1	1	no
T02G6.5	I:11817230-11819223	15.2693	14.847	0.0404675	0.84355	0.904658	no
T02G6.6	I:11819528-11820020	0.0812008	0.299922	-1.88502	1	1	no
T02G6.11	I:11821927-11823449	0.15343	0.0329961	2.21722	1	1	no
dhhc-2	I:11836449-11849174	5.83146	6.91886	-0.246677	0.32785	0.488336	no
dnj-27	I:11877792-11887258	21.4895	12.2999	0.804989	0.0001	0.000701046	yes
Y47H9C.8	I:11893874-11896270	52.234	54.5564	-0.0627605	0.65185	0.773714	no
Y47H9C.12	I:11896690-11896955	5.02758	7.12514	-0.503057	0.46295	0.619343	no
fbxa-216	I:11901597-11903160	4.96288	3.48937	0.50821	0.0787	0.170035	no
ubc-12	I:11911313-11912667	204.341	170.907	0.257764	0.2166	0.361759	no
R06C1.4	I:11930714-11931749	604.993	221.891	1.44707	5e-05	0.000377672	yes
R06C1.6	I:11946990-11953090	8.64668	13.5333	-0.646294	0.0013	0.00635523	yes
rga-2	I:11979429-11985602	2.37468	2.92046	-0.298462	0.24925	0.399989	no
Y53C10A.5	I:11998770-12004987	30.8794	30.8451	0.00160444	0.99565	0.996879	no
abt-5	I:12011265-12018658	0.775013	0.265558	1.54519	5e-05	0.000377672	yes
Y53C10A.10	I:12020747-12028288	0.753688	0.246538	1.61216	5e-05	0.000377672	yes
F58D5.6	I:12034061-12037220	0.418474	0.111841	1.90368	1	1	no
F58D5.5	I:12041024-12042976	41.3171	38.0844	0.117538	0.5712	0.709179	no
F58D5.3	I:12069795-12072868	1.03203	1.00497	0.0383247	0.91545	0.950218	no
M01G12.10	I:12117986-12122272	0	0.0569202	#VALUE!	1	1	no
srw-111	I:12122800-12125576	0	0	0	1	1	no
M01G12.5	I:12130059-12131371	0.0901293	0	#NAME?	1	1	no
sri-13	I:12140549-12142747	0	0	0	1	1	no
sri-17	I:12143996-12146967	0.0831082	0.0313837	1.40497	1	1	no
F15H9.5	I:12143996-12146967	0	0	0	1	1	no
F15H9.1	I:12157140-12158702	0.480399	0.0993522	2.27361	1	1	no
R05D7.2	I:12165718-12168012	1.09805	0.513106	1.09761	0.03565	0.0920152	no
R05D7.5	I:12183677-12188732	15.5339	14.6101	0.0884521	0.6809	0.795511	no
C15C6.1	I:12202221-12203645	11.1495	7.40532	0.59034	0.0547	0.128447	no
C15C6.2	I:12203789-12205795	37.0461	10.5733	1.8089	5e-05	0.000377672	yes
C15C6.3	I:12207088-12212196	33.4657	34.8817	-0.0597859	0.66095	0.780905	no
C15C6.4	I:12213119-12215169	80.0925	85.158	-0.088475	0.56225	0.70214	no
F14B6.3	I:12230405-12232296	6.51872	5.10197	0.353532	0.1817	0.317619	no
F14B6.6	I:12232678-12235084	4.01238	4.86374	-0.277605	0.39345	0.551804	no
F14B6.4	I:12236007-12238231	0.718097	1.01708	-0.502184	0.2128	0.35731	no
oac-16	I:12239149-12241798	0.0230301	0.0834461	-1.85732	1	1	no
nhr-82	I:12245445-12246741	0.0280305	0.151403	-2.43332	1	1	no
oac-26	I:12247760-12250200	0.00542328	0.0151213	-1.47934	1	1	no
nhr-265	I:12251895-12253544	0.422577	0.0314936	3.74608	1	1	no
F41D3.7	I:12267063-12267481	0.175016	0	#NAME?	1	1	no
F56H6.1	I:12281210-12282605	0.0254895	0.0755465	-1.56746	1	1	no
F56H6.13	I:12283259-12285366	0.0796556	0.0660287	0.270684	1	1	no
F56H6.16	I:12285735-12285922	0	0	0	1	1	no
F56H6.14	I:12286577-12286764	0	0	0	1	1	no
F56H6.2	I:12287188-12289297	0.298048	0.159291	0.903879	1	1	no
F56H6.4	I:12290438-12292202	0	0.00601947	#VALUE!	1	1	no
F56H6.7	I:12297723-12300807	0.00448334	0	#NAME?	1	1	no
F56H6.9	I:12303588-12306810	0	0.00498129	#VALUE!	1	1	no
oac-35	I:12307720-12310396	0	0	0	1	1	no
oac-36	I:12312324-12314885	0.0336129	0.0347726	-0.0489346	1	1	no
C47F8.6	I:12319339-12320844	0.0206597	0.0216308	-0.066268	1	1	no
C47F8.5	I:12321926-12324052	0.105856	0.0304126	1.79937	1	1	no
nhr-165	I:12331074-12333403	0.0476123	0.116714	-1.29357	1	1	no
C47F8.1	I:12335048-12336586	6.39053	7.00781	-0.13303	0.6257	0.75253	no
T09E11.1	I:12337957-12339229	0.0313685	0.0228432	0.457554	1	1	no
nhr-217	I:12341134-12342816	0	0	0	1	1	no
T09E11.8	I:12350681-12352714	0.0132125	0.019481	-0.560157	1	1	no
oac-45	I:12353495-12356327	0.00618051	0.0353955	-2.51777	1	1	no
oac-44	I:12356931-12359331	0.00629865	0.085143	-3.75677	1	1	no
oac-43	I:12359931-12363406	0	0.0543851	#VALUE!	1	1	no
T09E11.12	I:12364329-12365938	0	0	0	1	1	no
T09E11.6	I:12366324-12368609	0.00828212	0.00389491	1.08841	1	1	no
T09E11.3	I:12369178-12370597	0	0	0	1	1	no
T15D6.1	I:12371339-12372637	0	0.0178609	#VALUE!	1	1	no
T15D6.5	I:12381797-12383249	0	0.0099148	#VALUE!	1	1	no
T15D6.7	I:12385755-12388781	0.015563	0.0269216	-0.790641	1	1	no
T15D6.8	I:12389748-12390968	0	0.0431593	#VALUE!	1	1	no
T15D6.9	I:12391997-12393574	0	0	0	1	1	no
T15D6.10	I:12394108-12396267	0	0.0595261	#VALUE!	1	1	no
E03H4.4	I:12407552-12411424	0.00450448	0.0309109	-2.77868	1	1	no
E03H4.5	I:12413797-12415734	0	0	0	1	1	no
nhr-174	I:12417374-12418789	0	0.00495082	#VALUE!	1	1	no
oac-13	I:12421227-12424400	0.101044	0.0479365	1.07579	1	1	no
E03H4.11	I:12433049-12434875	0.166746	0.235819	-0.500029	1	1	no
E03H4.12	I:12435714-12437274	0	0.0124277	#VALUE!	1	1	no
nhr-169	I:12442287-12443717	0	0.0440706	#VALUE!	1	1	no
C54C8.2	I:12444575-12446457	0.417648	0.0433393	3.26854	1	1	no
glycosyltransferase	I:12449980-12451995	2.90975	0.601993	2.27308	5e-05	0.000377672	yes
C54C8.5	I:12453377-12454753	0	0	0	1	1	no
C54C8.12	I:12456914-12457198	0.297625	0.0635644	2.22721	1	1	no
nlp-39	I:12461633-12461914	0.622389	3.84775	-2.62813	0.04235	0.105509	no
gly-15	I:12462164-12465805	0.117585	0.051784	1.18313	1	1	no
T27F6.4	I:12484169-12486449	152.741	151.355	0.0131538	0.9159	0.950569	no
prs-2	I:12486939-12490877	55.915	49.4833	0.176295	0.52365	0.670121	no
T27F6.6	I:12490964-12494515	43.8501	50.9677	-0.217004	0.1329	0.252013	no
T27F6.7	I:12494814-12497340	53.0316	60.2029	-0.18298	0.231	0.378467	no
K11D2.1	I:12504116-12504904	6.92174	10.6851	-0.626387	0.0301	0.0808315	no
asah-1	I:12505086-12507613	31.3575	115.009	-1.87487	5e-05	0.000377672	yes
K11D2.5,unc-101	I:12508437-12518445	35.0603	39.0344	-0.154905	0.46485	0.620807	no
K11D2.4	I:12523507-12527542	19.0303	19.6214	-0.044133	0.8325	0.898499	no
W02D9.2	I:12532657-12534344	144.719	144.008	0.0071049	0.95775	0.976314	no
W02D9.3	I:12535310-12537655	27.7949	28.3954	-0.0308375	0.83645	0.900563	no
W02D9.10	I:12551526-12552333	21.317	56.1442	-1.39713	5e-05	0.000377672	yes
W02D9.9	I:12557152-12557532	0	0	0	1	1	no
W02D9.8	I:12558535-12558933	0	0	0	1	1	no
C49G9.2	I:12562957-12564199	3.05592	1.85934	0.716815	0.1833	0.319655	no
C49G9.1	I:12564510-12565794	6.86197	2.68687	1.35269	0.00655	0.0237816	yes
F33E2.4	I:12582274-12583288	1.4973	1.36846	0.129814	0.78975	0.868674	no
F33E2.7	I:12585387-12585960	0.951604	0.0332025	4.841	0.03115	0.0829285	no
F33E2.6	I:12587494-12591080	0.0389757	0.0126318	1.62552	1	1	no
F33E2.9	I:12594571-12594595	0	0	0	1	1	no
T07D10.7	I:12595692-12595714	0	0	0	1	1	no
T07D10.9	I:12608659-12608681	0	0	0	1	1	no
T07D10.2	I:12621159-12623073	0.427712	0.169674	1.33387	1	1	no
clec-13	I:12635160-12636531	0	0	0	1	1	no
H16D19.3	I:12638718-12640474	0.015052	0.0136021	0.146121	1	1	no
H28O16.1	I:12652265-12654635	1035.06	1121.72	-0.115999	0.5318	0.677344	no
fibrillin	I:12661345-12661657	7.99894	1.08508	2.882	0.00955	0.0321863	yes
T26E3.4	I:12665055-12668881	106.396	131.706	-0.307884	0.0212	0.0612776	no
par-6	I:12669368-12674436	63.5048	56.1302	0.17809	0.1834	0.319757	no
ndx-1	I:12679199-12681768	8.85405	8.59236	0.0432828	0.86305	0.916775	no
clec-103	I:12683238-12684327	0.335691	0.152168	1.14147	1	1	no
sra-25	I:12686104-12688195	0.0510791	0.0424038	0.268538	1	1	no
sra-17	I:12688715-12690561	0.13095	0.0370709	1.82066	1	1	no
sra-18	I:12692157-12693713	0	0.0173045	#VALUE!	1	1	no
sra-20	I:12696546-12698203	0.0280455	0	#NAME?	1	1	no
sra-21	I:12699418-12701020	0.0583073	0.0358688	0.700946	1	1	no
sra-22	I:12701427-12702875	0.0139254	0	#NAME?	1	1	no
sra-23	I:12703423-12704716	0.0253582	0	#NAME?	1	1	no
sra-24	I:12705085-12706972	0.01286	0	#NAME?	1	1	no
T06G6.5	I:12715650-12716572	0.0965553	0.0539282	0.840316	1	1	no
T06G6.6	I:12718339-12719784	17.5615	0.12573	7.12594	0.1202	0.233652	no
srw-88	I:12720142-12722025	0.087193	0	#NAME?	1	1	no
T06G6.8	I:12724849-12726195	0.246139	0.0043895	5.80927	1	1	no
pfd-3	I:12728160-12729856	177.232	149.167	0.248706	0.0568	0.13213	no
W02A11.3	I:12733287-12741216	25.6209	22.6698	0.176551	0.38725	0.545841	no
uba-2	I:12741593-12748576	30.3064	26.8617	0.174073	0.25375	0.405143	no
bath-34	I:12750024-12752056	4.7181	4.09479	0.204417	0.4855	0.639189	no
bath-35	I:12758512-12759458	8.31137	7.71791	0.106876	0.7155	0.818192	no
B0019.2	I:12773647-12782234	28.6831	35.1342	-0.292677	0.0298	0.0802216	no
Y18D10A.26	I:12783346-12784967	0.0174285	0.00760554	1.19633	1	1	no
Y18D10A.4	I:12815892-12816417	0.0400764	0	#NAME?	1	1	no
gsk-3	I:12819204-12824794	38.1528	39.0854	-0.0348393	0.81435	0.885243	no
nhx-8	I:12825675-12834132	11.7034	10.6711	0.133219	0.4471	0.60433	no
ptr-17	I:12834653-12843222	1.35581	0.573724	1.24073	0.0005	0.00282734	yes
Y18D10A.8	I:12844311-12858251	20.7538	13.1123	0.662455	0.0054	0.0203743	yes
clec-104	I:12859487-12861186	2.57043	0.966543	1.4111	0.0014	0.00675833	yes
pad-1	I:12878583-12902770	15.1276	16.9082	-0.160541	0.21155	0.355715	no
car-1	I:12904458-12906217	578.37	553.85	0.0624976	0.69035	0.801686	no
fkb-8	I:12916429-12918052	6.75722	5.66629	0.254026	0.35065	0.510889	no
fkb-2	I:12918707-12919265	900.187	647.292	0.475808	0.00015	0.00100493	yes
pfn-1	I:12921991-12923534	735.809	562.903	0.386444	0.00195	0.00885575	yes
Y18D10A.21	I:12929385-12931057	2.71068	1.25915	1.1062	0.01775	0.0533261	no
Y18D10A.22	I:12932024-12933739	0.945362	1.00063	-0.081963	0.8393	0.902245	no
tag-138	I:12934754-12937240	0.14784	0.35294	-1.25539	1	1	no
F08A8.1	I:12938542-12942200	17.4111	13.4935	0.367747	0.02935	0.0793846	no
F08A8.2	I:12942267-12946550	10.3212	2.56246	2.01001	5e-05	0.000377672	yes
F08A8.3,F08A8.4	I:12946934-12955204	6.17937	5.27155	0.229233	0.3428	0.503019	no
eif-6	I:12968908-12970225	142.376	171.561	-0.269018	0.038	0.0967518	no
prx-11	I:12971602-12972247	17.5247	9.77393	0.842382	0.00185	0.00846397	yes
gale-1	I:12975172-12978737	93.3854	77.1325	0.275858	0.0423	0.105452	no
selb-1	I:12978826-12982428	21.7617	27.8983	-0.358387	0.0284	0.0773172	no
C47B2.9	I:12983007-12983956	50.2263	43.7738	0.198376	0.3016	0.459724	no
nlp-15	I:12988220-12995459	41.0319	56.1749	-0.453179	0.0148	0.04609	yes
smu-1	I:12995794-13023560	53.6573	58.3349	-0.120586	0.4989	0.649406	no
pmr-1	I:12995794-13023560	28.3851	29.3504	-0.0482434	0.78345	0.864687	no
W05B5.4	I:13033612-13035692	5.08352	8.2762	-0.703141	0.40725	0.566364	no
W05B5.1	I:13042680-13045105	23.1073	20.4025	0.179602	0.4474	0.604577	no
W05B5.2	I:13050432-13056022	0.577143	0.280953	1.0386	0.0603	0.13833	no
Y26D4A.2	I:13066954-13069026	1.94845	0.2833	2.78193	0.0002	0.00127822	yes
Y26D4A.5	I:13076609-13077008	0.223317	0	#NAME?	1	1	no
Y26D4A.17	I:13077543-13077929	0	0	0	1	1	no
Y26D4A.13	I:13091096-13094425	0.00567033	0.00671625	-0.244223	1	1	no
Y26D4A.10	I:13098674-13099925	0	0.00945914	#VALUE!	1	1	no
Y26D4A.21	I:13101343-13101889	1.00327	0.985509	0.0257634	0.9611	0.977891	no
C17H1.3	I:13104240-13106286	0.0208256	0.0643045	-1.62656	1	1	no
C17H1.5	I:13113624-13116422	0.228584	0.238675	-0.0623243	1	1	no
C17H1.9	I:13121079-13123501	0.0682636	0.0679625	0.00637696	1	1	no
C17H1.10	I:13133635-13136144	0.0337809	0	#NAME?	1	1	no
F22G12.1	I:13139119-13141777	0.205453	0.696696	-1.76172	0.0045	0.0175191	yes
F22G12.7,F22G12.8	I:13143188-13146441	2.19703	3.46621	-0.657807	0.1105	0.219081	no
F22G12.3	I:13152583-13153675	0.811537	0.564629	0.523353	0.29185	0.448635	no
F22G12.5	I:13162486-13182647	17.806	18.1976	-0.0313774	0.8031	0.877346	no
F17B5.1	I:13184899-13188169	0.293888	2.08105	-2.82397	5e-05	0.000377672	yes
F17B5.8	I:13189779-13194562	2.43109	1.28898	0.915371	0.0414	0.10356	no
F17B5.4	I:13199346-13200957	0	0.00832418	#VALUE!	1	1	no
F17B5.6	I:13201796-13204213	0.447027	0.281566	0.66689	1	1	no
clec-110	I:13204484-13205391	0.293478	0	#NAME?	1	1	no
ZK1225.1	I:13205651-13207747	0.260771	0.0987106	1.4015	1	1	no
ZK1225.2	I:13208428-13210450	0.068185	0.127867	-0.907123	1	1	no
ssp-31	I:13219073-13219533	22.5575	8.11396	1.47513	0.00015	0.00100493	yes
ZK1053.2	I:13232144-13234648	4.62416	1.06548	2.11769	5e-05	0.000377672	yes
scrm-2	I:13235354-13236458	0.974936	1.43868	-0.561368	0.1778	0.311899	no
ZK1053.7	I:13237041-13238290	0	0	0	1	1	no
ZK1053.6	I:13238527-13240714	0.796514	0.134741	2.56352	0.00085	0.00446105	yes
ZK1053.4	I:13241651-13244718	6.63514	8.518	-0.360388	0.0755	0.164831	no
ZK1053.3	I:13246840-13249669	0.597384	0.791715	-0.406322	0.28005	0.435141	no
F44F1.3	I:13254128-13257655	0.980838	0.314193	1.64236	0.00225	0.00994557	yes
vet-6	I:13269982-13272769	5.91062	1.43453	2.04273	5e-05	0.000377672	yes
M01E5.1	I:13274098-13276403	0.0630723	0.0376557	0.744141	1	1	no
top-1	I:13292501-13297541	97.4487	96.8665	0.00864531	0.94465	0.968264	no
M01E5.7	I:13297864-13297973	0	0	0	1	1	no
sdz-30	I:13306192-13308673	5.28134	1.40515	1.91018	5e-05	0.000377672	yes
T04D3.8	I:13309981-13310638	51.8793	67.3308	-0.376106	0.11715	0.229431	no
gcy-35	I:13325349-13333324	1.84939	1.0348	0.837701	0.3045	0.462817	no
snr-2	I:13339384-13340203	491.48	392.909	0.322937	0.01055	0.0349002	yes
tag-210	I:13340320-13343923	335.118	406.64	-0.279085	0.0263	0.0729272	no
Y40B1A.1	I:13345348-13346764	2.34273	2.30969	0.0204964	0.90395	0.943186	no
Y40B1A.2	I:13347067-13349247	1.20446	0.951379	0.340295	0.59315	0.727058	no
Y40B1A.5	I:13352034-13353237	5.23298	6.42614	-0.296321	0.40825	0.56755	no
Y40B1A.3	I:13354057-13358366	12.8629	15.0019	-0.221928	0.2662	0.419801	no
C01A2.9	I:13376863-13377553	0.0614607	0	#NAME?	1	1	no
C01A2.6	I:13379904-13384359	0.0779653	0.269481	-1.78928	1	1	no
C01A2.5	I:13384739-13387072	108.091	130.915	-0.276389	0.03075	0.0822473	no
C01A2.3	I:13387806-13391438	52.1872	44.7685	0.221211	0.1123	0.221793	no
C01A2.4	I:13392105-13393965	95.5007	126.48	-0.405325	0.0052	0.0197795	yes
C01A2.2	I:13397257-13398468	32.0137	33.1639	-0.0509244	0.9207	0.953535	no
nlp-38	I:13402434-13404075	19.9787	25.2644	-0.338641	0.15205	0.278656	no
W05H12.1	I:13418445-13423312	14.3532	10.3677	0.469281	0.01925	0.0569444	no
Y40B1B.8	I:13428900-13434592	34.3679	35.7446	-0.056662	0.6861	0.798677	no
eif-3.J	I:13435476-13437953	166.591	150.772	0.14394	0.26445	0.417768	no
spr-5	I:13438044-13450185	35.157	39.095	-0.153174	0.2446	0.394995	no
Y48G10A.6	I:13451506-13452829	15.9019	11.3196	0.490375	0.13365	0.253124	no
Y48G10A.1	I:13489547-13491214	85.2019	79.084	0.1075	0.4287	0.587186	no
ndx-8	I:13503032-13506959	3.82255	3.51546	0.120824	0.7098	0.814027	no
Y87G2A.19	I:13508801-13512014	114.92	49.9503	1.20206	5e-05	0.000377672	yes
Y87G2A.21	I:13512371-13514308	0	0	0	1	1	no
Y87G2A.1	I:13514531-13526179	30.8038	36.7093	-0.253037	0.0591	0.136206	no
Y87G2A.2	I:13534732-13542398	13.1669	8.0812	0.704274	0.05515	0.12917	no
Y87G2A.16	I:13560515-13563438	2.81213	0.774045	1.86117	0.0001	0.000701046	yes
grd-15	I:13564556-13572051	1.2463	1.15891	0.104882	0.94975	0.971308	no
Y87G2A.7	I:13572366-13575610	63.0862	75.1196	-0.251865	0.0514	0.122452	no
gpi-1	I:13576235-13581572	134.678	167.929	-0.318337	0.01055	0.0349002	yes
ubc-14	I:13581685-13585284	100.263	104.644	-0.06171	0.68475	0.79771	no
Y87G2A.12	I:13589096-13598492	0.374314	0.216186	0.791973	1	1	no
unc-59	I:13629214-13633482	110.785	121.945	-0.138469	0.26775	0.421297	no
W09C5.7	I:13654015-13658150	50.1894	51.9643	-0.0501405	0.68905	0.800903	no
W09C5.9	I:13659417-13661752	1.83343	0.910027	1.01056	0.08795	0.184585	no
W04A4.5	I:13663471-13674946	29.3008	30.6899	-0.0668272	0.60915	0.739843	no
W04A4.2	I:13682408-13684327	16.8525	30.2218	-0.842633	5e-05	0.000377672	yes
Y6B3B.3	I:13709765-13719515	0.0597297	0.0182478	1.71073	1	1	no
Y6B3B.7	I:13734957-13751111	2.71039	1.31161	1.04716	0.36315	0.522456	no
Y6B3B.12	I:13756723-13758949	3.11453	5.83874	-0.906644	0.0022	0.00976658	yes
Y6B3B.4	I:13759608-13771760	7.44055	9.89235	-0.410904	0.0246	0.0690332	no
Y37H9A.1	I:13773053-13778724	13.1546	17.6774	-0.426339	0.02305	0.0655672	no
Y37H9A.3	I:13778885-13792152	15.9197	17.6978	-0.152754	0.31395	0.473474	no
W04A8.2	I:13840692-13841833	6.06662	5.96193	0.0251147	0.93485	0.961558	no
W04A8.6	I:13853065-13859538	48.9139	51.0517	-0.0617155	0.63035	0.755763	no
taf-1	I:13861462-13887425	17.5752	20.7934	-0.242585	0.05855	0.135282	no
Y71A12B.3	I:13893119-13894463	0.0813677	0.0140938	2.52939	1	1	no
trp-4	I:13899155-13913841	0.623164	0.403825	0.625882	0.0446	0.109818	no
clec-111	I:13915650-13917796	0	0	0	1	1	no
clec-112	I:13919361-13922109	0.0737177	0.00550251	3.74385	1	1	no
Y71A12B.8	I:13938171-13942003	0.0505996	0.0900851	-0.832163	1	1	no
rps-6	I:13952147-13953176	1441.85	1375.21	0.0682656	0.65815	0.778254	no
Y71A12B.10	I:13957185-13960427	0.720538	0.504504	0.51421	0.2158	0.360814	no
Y71A12B.11	I:13978416-13980110	14.2108	4.8193	1.56009	5e-05	0.000377672	yes
Y71A12B.17	I:13984294-13989575	1.57533	0.868739	0.858661	0.006	0.0222032	yes
Y71A12B.15	I:13992568-13996208	0.0877456	0.514486	-2.55173	0.00055	0.00307621	yes
Y71A12B.12	I:14004445-14008458	7.44343	8.38928	-0.172579	0.42255	0.581086	no
ZC334.7	I:14009883-14011453	0.874019	0.769267	0.184181	0.70305	0.81033	no
ins-29	I:14018794-14019653	7.90536	11.7259	-0.568796	0.3574	0.517154	no
ins-25	I:14020350-14021142	3.38876	7.39011	-1.12484	0.2286	0.375533	no
ins-27	I:14027241-14027536	97.4996	89.3854	0.125358	0.6765	0.792292	no
nhr-276	I:14041613-14043465	0.049649	0	#NAME?	1	1	no
F47G4.6	I:14059406-14060804	0.561664	1.38543	-1.30255	0.08875	0.185884	no
gpdh-1	I:14075822-14082523	10.3051	2.46699	2.06254	0.00385	0.0154854	yes
fbxb-56	I:14084509-14087338	0.496994	0.180953	1.45762	1	1	no
fbxb-101	I:14088080-14089845	0.874724	2.2936	-1.39071	0.0015	0.00714924	yes
tfg-1	I:14101263-14113166	77.9356	49.8894	0.643549	0.00335	0.0138133	yes
Y63D3A.7	I:14113622-14114078	290.39	261.744	0.149834	0.3243	0.484971	no
Y63D3A.8	I:14114180-14118624	49.0251	46.4061	0.0792083	0.5653	0.70475	no
mys-2	I:14118744-14127160	28.3794	27.8559	0.0268602	0.8458	0.906125	no
fipr-22	I:14155483-14156303	1.79198	5.21231	-1.54037	5e-05	0.000377672	yes
fipr-24	I:14157641-14157956	2.95173	9.83766	-1.73676	0.006	0.0222032	yes
C37A5.7	I:14163433-14168284	15.6616	16.1308	-0.0425905	0.817	0.887098	no
C37A5.11	I:14171850-14172773	13.1586	10.8935	0.272537	0.64425	0.767294	no
ZK849.5	I:14200006-14204630	1.596	0.623568	1.35584	0.0016	0.00753036	yes
ZK849.4	I:14205703-14208568	0.447213	0.101259	2.14291	1	1	no
C49A1.1	I:14213729-14215777	0.174979	0.0785627	1.15527	1	1	no
C49A1.5	I:14237385-14241162	0.052782	0.087497	-0.729186	1	1	no
clec-115	I:14246214-14247301	0	0	0	1	1	no
clec-116	I:14251047-14252349	0.0150578	0.0177556	-0.237768	1	1	no
K04H8.2	I:14252943-14255497	0	0	0	1	1	no
K04H8.3	I:14255670-14256957	2.70803	0.866766	1.64353	0.00205	0.00924991	yes
pes-7	I:14263287-14271304	6.84041	6.72038	0.0255381	0.87795	0.926397	no
fbxb-67	I:14297275-14298252	7.57539	4.45374	0.766302	0.0082	0.0284709	yes
fbxb-8	I:14298741-14299750	1.41959	3.50758	-1.305	0.00015	0.00100493	yes
F49B2.7	I:14305056-14307121	0.863508	0.791673	0.125305	0.8073	0.880312	no
F49B2.3	I:14310995-14312858	0.0975382	0.125454	-0.363115	1	1	no
src-2	I:14322223-14328913	6.42432	2.61514	1.29665	5e-05	0.000377672	yes
F49B2.6	I:14331071-14339818	3.67202	1.93244	0.926151	0.00025	0.00155458	yes
Y105E8A.3	I:14358510-14367578	70.0661	61.3668	0.191259	0.1342	0.253822	no
eat-18	I:14390319-14400209	14.4243	8.12677	0.827744	5e-05	0.000377672	yes
apg-1	I:14406014-14417916	40.5253	44.0624	-0.120727	0.34685	0.507175	no
Y105E8A.10	I:14418183-14431791	34.7961	34.7228	0.00303958	0.9812	0.989419	no
Y105E8A.11	I:14432779-14433728	110.834	119.93	-0.113799	0.53045	0.676183	no
Y105E8A.27	I:14436893-14451865	4.38106	1.38394	1.66249	0.10505	0.21077	no
Y105E8A.15	I:14466228-14468198	0.134999	0	#NAME?	1	1	no
ekl-4	I:14469492-14486749	69.1415	78.4889	-0.182936	0.30385	0.461966	no
zoo-1	I:14529517-14546621	7.44323	5.75555	0.370974	0.03995	0.100652	no
Y105E8B.7	I:14642719-14646587	9.30701	12.9096	-0.472053	0.0605	0.138644	no
bath-40	I:14647768-14651427	117.634	123.8	-0.0736973	0.5562	0.697525	no
Y105E8B.3	I:14652102-14657262	79.2196	102.321	-0.369169	0.0029	0.0123374	yes
Y105E8B.5	I:14657341-14661401	121.59	85.3719	0.510194	0.00015	0.00100493	yes
Y105E8B.6	I:14662524-14662852	112.9	123.657	-0.131295	0.6278	0.753879	no
ero-1	I:14664435-14674783	80.4761	92.4671	-0.20038	0.11425	0.224866	no
Y54E5A.2	I:14694156-14700287	2.91785	2.25439	0.372172	0.2056	0.348371	no
Y54E5A.7	I:14711067-14715017	28.2874	33.8281	-0.258063	0.0585	0.135227	no
Y54E5A.8	I:14716598-14719005	12.0491	22.0048	-0.868886	0.00035	0.00207829	yes
K05C4.10	I:14725282-14726118	0.0911463	0	#NAME?	1	1	no
K05C4.8	I:14732412-14733536	0.727215	0.826171	-0.184059	0.7787	0.861377	no
K05C4.4	I:14735222-14736932	4.95776	6.21301	-0.325605	0.2261	0.37218	no
K05C4.7	I:14737689-14738722	120.007	101.292	0.244594	0.06025	0.138256	no
hmp-2	I:14739555-14742644	73.4118	71.829	0.0314463	0.7954	0.872212	no
K05C4.5	I:14742751-14747777	55.498	60.4333	-0.122909	0.3374	0.498322	no
dnj-12	I:14756844-14758774	188.76	209.321	-0.149164	0.2325	0.380439	no
rps-26	I:14759916-14760634	3502.08	3397.01	0.0439475	0.76365	0.851626	no
uev-1	I:14790230-14790921	270.112	325.52	-0.269192	0.0296	0.0798366	no
F39B2.1	I:14791041-14794042	71.6074	67.1277	0.0931989	0.4716	0.627158	no
K11B4.1	I:14794885-14797145	62.5517	65.7848	-0.0727058	0.59045	0.72496	no
K11B4.2	I:14797649-14798663	68.6317	77.8923	-0.182605	0.2951	0.452547	no
smp-1	I:14807453-14820209	21.3152	27.5316	-0.369203	0.037	0.0947222	no
let-49	I:14820367-14821638	94.8225	92.3527	0.0380754	0.7865	0.866336	no
ubc-16	I:14822036-14823959	90.3895	111.193	-0.298836	0.03105	0.082834	no
F32A7.8	I:14838903-14839125	0	6.2774	#VALUE!	5e-05	0.000377672	yes
F32A7.4	I:14839891-14843090	55.9579	60.4296	-0.110911	0.40245	0.561278	no
F32A7.5	I:14846464-14863527	15.9397	17.2106	-0.110678	0.92765	0.957348	no
str-245	I:14846464-14863527	0.798406	2.11513	-1.40556	0.216	0.361031	no
F11C3.1	I:14867823-14871352	2.61623	2.4932	0.0694957	0.82615	0.893703	no
unc-122	I:14872148-14875365	1.4694	1.19127	0.302735	0.37625	0.535501	no
ptr-23	I:14909226-14913110	7.04171	6.40788	0.136079	0.4678	0.623558	no
F21F12.1	I:14913609-14915558	0.42841	0.226106	0.921994	1	1	no
kin-1	I:14919517-14951554	44.0723	34.919	0.335859	0.03075	0.0822473	no
ZK909.3	I:14953474-14955477	33.3013	25.5934	0.379805	0.059	0.136131	no
ces-2	I:14961508-14965339	1.2304	10.188	-3.04968	5e-05	0.000377672	yes
ZK909.6	I:14967299-14968457	36.5496	45.8975	-0.328559	0.2177	0.362967	no
ZK337.2	I:14975405-14980586	6.17531	2.30817	1.41977	5e-05	0.000377672	yes
tag-4	I:14984481-14985087	0	0	0	1	1	no
ZK337.1	I:14993807-15001572	11.7259	16.7759	-0.516697	0.00025	0.00155458	yes
mtd-1	I:15001860-15005595	4.06242	3.00204	0.436393	0.16745	0.2985	no
F33H2.2	I:15023126-15030537	56.3097	59.3754	-0.0764812	0.5586	0.699055	no
F33H2.3	I:15034503-15035454	110.742	72.7721	0.605746	5e-05	0.000377672	yes
F31C3.2	I:15036359-15041268	54.1866	52.2047	0.0537564	0.86855	0.920196	no
F31C3.5	I:15053011-15053605	153.155	141.625	0.11292	0.4358	0.593534	no
Y74C9A.6	I:3746-3909	2.75274	2.88701	-0.0687091	1	1	no
Y74C9A.3	I:4123-10232	51.9424	70.5828	-0.442402	0.00475	0.018344	yes
Y74C9A.4	I:17496-26781	58.1477	68.8945	-0.244666	0.05685	0.132207	no
sesn-1	I:27594-32482	21.9971	27.6128	-0.328025	0.0284	0.0773172	no
Y48G1C.5	I:55315-64021	0.905774	0.257557	1.81426	5e-05	0.000377672	yes
Y48G1C.6	I:85044-86284	9.62205	8.56563	0.167785	0.5459	0.688925	no
Y48G1C.7	I:96478-100613	63.6339	65.4045	-0.039593	0.7455	0.839846	no
Y48G1C.8	I:101414-108161	12.1331	12.7091	-0.0669077	0.68255	0.796593	no
rab-11.1	I:108681-110057	380.879	355.042	0.101344	0.42455	0.5829	no
F53G12.11	I:145330-145627	0.472961	0.367067	0.365678	1	1	no
bli-3	I:146498-154819	3.61189	3.92857	-0.12125	0.5505	0.692631	no
ptr-11	I:160171-166819	4.07735	2.33821	0.802225	0.00215	0.00957773	yes
F56C11.3	I:178537-182771	45.353	52.5921	-0.21365	0.42925	0.587626	no
Y48G1BL.4	I:216004-219099	33.2253	31.7348	0.066217	0.91235	0.948098	no
Y48G1BL.5	I:219734-220560	3.96189	6.69418	-0.756717	0.04775	0.115652	no
Y48G1BL.6	I:221248-221574	7.40129	12.605	-0.768143	0.08385	0.178213	no
Y48G1BM.5	I:229089-234973	0.710284	0.493772	0.52455	0.1328	0.251885	no
Y48G1BM.6	I:235129-238252	0.096879	0.0696534	0.47599	1	1	no
Y48G1BM.7	I:238615-239021	0.0811267	0.094309	-0.217218	1	1	no
Y48G1BM.8	I:248623-251580	2.55448	2.76701	-0.115299	0.7219	0.822946	no
Y48G1BM.9	I:254708-256606	4.42373	5.07692	-0.19869	0.53	0.675666	no
Y48G1BR.1	I:257413-259157	2.59786	3.13468	-0.270997	0.421	0.579731	no
ztf-3	I:286155-289122	22.4057	24.747	-0.143384	0.41355	0.572285	no
gamma-glutamyltranspeptidase	I:305813-310888	9.43029	7.31534	0.366377	0.0733	0.161331	no
imb-3	I:310981-314990	173.484	156.508	0.148568	0.2674	0.421004	no
xpo-2	I:318546-323353	70.0821	79.2603	-0.177553	0.16045	0.289607	no
mbtr-1	I:343117-348367	28.021	33.4185	-0.254136	0.1982	0.338663	no
R119.1	I:357238-363904	12.313	14.8961	-0.274746	0.1101	0.218597	no
peptidase	I:364521-371636	16.5387	23.1493	-0.485124	0.1718	0.303969	no
dehydrogenase,pqn-59	I:373635-381905	252.023	272.896	-0.114795	0.4251	0.583396	no
R119.5	I:382835-394414	5.66038	8.64651	-0.611218	0.05975	0.137314	no
Y50C1A.2	I:412913-418663	0.712634	0.966984	-0.440332	0.277	0.431882	no
W04C9.5	I:462659-467134	1.40905	1.12549	0.324173	0.3908	0.549328	no
W04C9.6	I:482481-487993	0.421218	0.444833	-0.0786966	1	1	no
Y65B4BL.3	I:496207-502046	24.0168	25.6282	-0.0936891	0.61395	0.743797	no
Y65B4BL.4	I:502957-506253	64.5919	63.2588	0.0300867	0.83095	0.8974	no
Y65B4BL.7	I:506479-510840	4.50593	8.05161	-0.837454	0.6845	0.7976	no
acs-13	I:511017-516459	204.294	223.068	-0.126838	0.3321	0.493189	no
Y65B4BL.6	I:520147-521557	0.600826	0.583128	0.0431345	0.94125	0.965627	no
ceh-9	I:565442-566394	2.18396	0.774002	1.49654	0.01285	0.0410545	yes
grl-16	I:572179-575122	28.2252	8.75557	1.68871	5e-05	0.000377672	yes
F56A6.5	I:582307-583621	0.133617	0.13585	-0.0239088	1	1	no
hum-7	I:585833-607574	4.05655	3.80719	0.0915237	0.61675	0.74602	no
F56A6.4	I:614725-629447	41.6315	50.025	-0.264975	0.062	0.141158	no
Y65B4A.6	I:631096-636353	27.5681	20.6328	0.418059	0.01995	0.0585877	no
Y65B4A.7	I:645453-653978	3.09393	1.20229	1.36365	0.4064	0.565539	no
Y65B4A.8,Y65B4A.9	I:659562-666850	15.9544	14.7761	0.110691	0.53385	0.678952	no
Y18H1A.14	I:667617-674416	0.0874738	0.333741	-1.9318	1	1	no
Y18H1A.10	I:683726-686578	1.84846	0.87421	1.08027	0.00275	0.0117904	yes
Y18H1A.2,Y18H1A.4	I:692030-698330	79.5285	81.6126	-0.0373199	0.80075	0.875586	no
Y18H1A.3	I:700291-715853	16.1664	15.9601	0.0185258	0.8955	0.937161	no
Y18H1A.7	I:717941-719730	42.6414	37.5285	0.184268	0.21865	0.364157	no
Y18H1A.15	I:731982-736553	0.722163	0.169422	2.0917	0.00075	0.00400858	yes
col-46	I:742006-745456	6.45863	0.128678	5.64939	0.00015	0.00100493	yes
Y18H1A.9	I:748229-757012	5.68651	2.08813	1.44533	5e-05	0.000377672	yes
mps-3	I:760918-761838	5.31792	1.27475	2.06065	0.0001	0.000701046	yes
ZC123.4	I:841755-846765	7.44451	5.3009	0.489939	0.0341	0.0889081	no
pde-6	I:873482-882715	9.86127	8.95871	0.138482	0.46705	0.623123	no
Y95B8A.11	I:889933-895101	17.0282	22.2135	-0.383517	0.0499	0.119824	no
Y95B8A.12	I:912416-926879	5.16672	2.04223	1.33911	5e-05	0.000377672	yes
mig-1	I:948575-957375	11.1449	14.2252	-0.352064	0.0797	0.171666	no
cutl-20	I:963701-969428	6.68522	5.0781	0.396686	0.14135	0.263848	no
shc-1	I:969681-973139	10.7518	10.7262	0.00344446	0.9878	0.992955	no
C54G6.1	I:1011387-1014383	34.0638	39.0362	-0.196572	0.23025	0.377479	no
Y34D9A.1	I:1019885-1029912	67.3678	83.9918	-0.318189	0.01755	0.0528696	no
spd-1	I:1030634-1033438	53.2789	58.479	-0.134354	0.30355	0.461646	no
Y34D9A.8	I:1050925-1053647	5.08154	6.44981	-0.343991	0.34905	0.50904	no
vps-4	I:1053922-1066901	64.2618	79.6668	-0.310016	0.0182	0.0544023	no
R06A10.3	I:1078425-1079236	0	0.0353353	#VALUE!	1	1	no
R06A10.4	I:1089126-1095798	6.91975	5.04023	0.45723	0.0678	0.151476	no
Y48G8AL.9	I:1136375-1141023	31.3963	35.3351	-0.170507	0.31065	0.469525	no
Y48G8AL.10	I:1142031-1154388	9.82819	11.1121	-0.177128	0.27875	0.433865	no
aps-3	I:1155399-1156022	48.2391	40.9602	0.235981	0.23905	0.388762	no
haf-6	I:1162890-1175870	17.708	13.4289	0.399056	0.01505	0.0466986	yes
Y48G8AL.12	I:1211493-1254666	85.4581	3.38992	4.6559	0.0104	0.0345077	yes
Y48G8AL.13	I:1211493-1254666	98.923	158.045	-0.675961	0.00025	0.00155458	yes
grh-1	I:1259489-1268156	3.47786	1.49824	1.21493	0.0004	0.00232501	yes
K12C11.1	I:1340678-1344695	58.3639	58.2824	0.00201426	0.9937	0.995818	no
Y92H12BL.4	I:1376942-1385058	7.34739	7.28213	0.0128711	0.9618	0.978372	no
Y92H12BM.1	I:1386257-1392760	6.79272	6.80847	-0.00334135	0.99465	0.996396	no
Y92H12BR.2	I:1413947-1415809	120.027	107.955	0.152923	0.28215	0.437588	no
Y92H12BR.4	I:1433015-1433852	0.517828	0.259887	0.994591	0.4916	0.643755	no
F37F2.2	I:1441666-1443943	95.9666	71.0512	0.433674	0.01475	0.0459807	yes
gst-25	I:1446666-1465341	0.26211	0.0570083	2.20093	1	1	no
Y92H12A.5	I:1491340-1514410	10.0956	12.8644	-0.349647	0.02215	0.0634286	no
cpx-1	I:1594670-1596176	28.9082	15.9749	0.855675	0.0002	0.00127822	yes
Y73E7A.5	I:1600624-1601497	0.488122	0.969066	-0.989354	0.07595	0.165486	no
Y73E7A.6	I:1607705-1610037	122.376	105.724	0.211012	0.18805	0.325763	no
bre-4	I:1621526-1626606	20.2533	21.4148	-0.0804512	0.66745	0.785514	no
mab-20	I:1644588-1651381	12.4798	13.5823	-0.122134	0.46315	0.61945	no
pqn-88	I:1655645-1656727	5.41829	6.3591	-0.230985	0.47005	0.625475	no
Y71G12B.33	I:1657620-1661009	0.445927	0.182482	1.28906	1	1	no
Y71G12B.22	I:1663426-1666769	2.80812	0.782601	1.84326	0.001	0.00510063	yes
Y71G12B.23	I:1670079-1676431	6.57197	5.33734	0.300204	0.1968	0.336906	no
Y71G12B.31	I:1686216-1691612	0.552034	0.935172	-0.760475	0.09805	0.200166	no
mppa-1	I:1721592-1751056	32.5181	28.3715	0.196799	0.3876	0.546085	no
Y71G12B.25	I:1767887-1790156	8.60101	3.74162	1.20084	0.09415	0.193848	no
Y71G12B.26	I:1767887-1790156	2.02262	1.70868	0.243343	0.83175	0.898013	no
Y71G12B.27	I:1797435-1798646	15.9186	7.1447	1.15577	0.0031	0.0130442	yes
Y71G12B.32	I:1814102-1816018	0.365053	0.443877	-0.282055	1	1	no
Y71G12B.30	I:1818989-1822932	3.74729	1.51625	1.30534	0.0014	0.00675833	yes
C53H9.3	I:1832115-1832422	195.747	162.992	0.264186	0.19135	0.329811	no
M01D7.9	I:1851733-1855127	0.175942	0.099345	0.824579	1	1	no
M01D7.1	I:1857892-1860579	0.121176	0.0876493	0.467287	1	1	no
scm-1	I:1862612-1872307	66.4007	82.0104	-0.304607	0.02075	0.0603277	no
Y71G12A.4	I:1885205-1894864	2.00542	0.997319	1.00778	0.00465	0.0180166	yes
Y51F10.7	I:1911678-1913967	240.635	140.334	0.777982	5e-05	0.000377672	yes
Y51F10.10	I:1950598-1958513	50.4941	54.1928	-0.101985	0.4675	0.623266	no
gap-3	I:1988724-2010481	3.7817	4.7482	-0.328345	0.15945	0.288241	no
Y20F4.4	I:2034384-2043813	4.75168	3.98253	0.254754	0.20275	0.344413	no
Y20F4.8	I:2049141-2050179	1.63203	0.56236	1.5371	0.0008	0.00423906	yes
Y20F4.5	I:2050815-2053703	1.28837	1.27927	0.0102301	0.97675	0.98661	no
Y37E3.1	I:2061670-2064018	47.1467	52.4702	-0.154342	0.27705	0.431917	no
rla-1	I:2069087-2069589	5846.61	5182.29	0.174008	0.29855	0.456475	no
Y37E3.8	I:2069680-2070611	6226.1	6382.02	-0.0356842	0.85045	0.908841	no
Y37E3.22	I:2069680-2070611	0	0	0	1	1	no
Y37E3.21	I:2069680-2070611	0	0	0	1	1	no
Y37E3.13	I:2085674-2093824	5.61275	7.71001	-0.458026	0.0663	0.149054	no
Y37E3.19	I:2097347-2123429	4.65425	1.39258	1.74079	0.34815	0.508352	no
fpn-1.1	I:2097347-2123429	12.3983	12.5297	-0.0152088	0.97025	0.982866	no
W03F11.1	I:2219471-2222314	61.9345	57.1811	0.115205	0.45875	0.615434	no
gcy-17	I:2223307-2233192	0.199833	0.0680198	1.55477	1	1	no
dct-9	I:2233778-2234907	5.51442	1.43355	1.94362	5e-05	0.000377672	yes
W03F11.4	I:2235636-2241358	2.70564	0.559816	2.27294	5e-05	0.000377672	yes
abt-2	I:2255923-2272867	3.90887	5.18722	-0.408208	0.01535	0.047467	yes
cdk-7	I:2281512-2291184	104.579	131.677	-0.332405	0.00845	0.0291746	yes
tpxl-1	I:2293132-2304396	113.853	101.528	0.165298	0.3952	0.553503	no
icp-1	I:2304512-2306817	73.0919	63.8328	0.195412	0.12105	0.234801	no
mcm-4	I:2318292-2321848	94.2605	102.535	-0.121386	0.3313	0.492523	no
Y39G10AR.15	I:2322076-2327253	16.6528	15.0009	0.150713	0.35385	0.513706	no
Y39G10AR.16	I:2330946-2332601	10.8646	3.4563	1.65233	5e-05	0.000377672	yes
Y39G10AR.17	I:2377089-2381852	2.22215	3.05376	-0.458636	0.1094	0.217544	no
Y39G10AR.18	I:2382965-2401489	35.625	35.5892	0.0014525	0.9917	0.994799	no
F23C8.5	I:2415133-2420405	267.393	187.832	0.509517	0.0002	0.00127822	yes
F23C8.6	I:2420831-2421743	159.923	179.938	-0.170116	0.18095	0.31656	no
F23C8.7	I:2422405-2425074	3.36453	1.3338	1.33487	0.0002	0.00127822	yes
F23C8.8,F23C8.9	I:2429772-2433614	80.1996	86.1076	-0.102545	0.4695	0.625067	no
F23C8.11	I:2449414-2451055	0.0643659	0.0676904	-0.0726552	1	1	no
F23C8.12	I:2451147-2451808	0	0	0	1	1	no
inx-19	I:2451908-2464638	1.94292	1.69908	0.19347	0.5706	0.708662	no
Y74C10AL.2	I:2468788-2471936	102.02	104.127	-0.029496	0.8483	0.907793	no
abtm-1	I:2472418-2485383	12.391	10.287	0.268474	0.1619	0.291371	no
Y23H5B.7	I:2506779-2513784	3.16217	1.75731	0.84755	0.02235	0.0639063	no
Y23H5B.10	I:2514168-2514312	21.9857	21.3442	0.0427156	1	1	no
Y23H5B.8	I:2546966-2548328	4.67531	8.30818	-0.82947	0.0166	0.0506213	no
nspd-8	I:2551375-2551591	0.945296	0.553834	0.771313	1	1	no
aat-5	I:2571782-2576021	13.5475	12.4877	0.117516	0.5448	0.688044	no
fbp-1	I:2580941-2586127	128.898	152.061	-0.238425	0.05985	0.137502	no
ptr-12	I:2587541-2595281	7.29316	2.95102	1.30533	5e-05	0.000377672	yes
crs-1	I:2621957-2628578	71.814	92.6744	-0.367905	0.0049	0.0188149	yes
F40E3.5	I:2645282-2657234	3.84645	3.70832	0.0527607	0.85655	0.912692	no
F40E3.6	I:2645282-2657234	0.056142	0.0514968	0.124597	1	1	no
F32B5.7	I:2672950-2682798	8.99351	5.37528	0.742544	0.00055	0.00307621	yes
cpz-1	I:2686640-2689474	418.611	316.72	0.402402	0.0014	0.00675833	yes
dnj-30	I:2718030-2721470	82.1231	87.4564	-0.0907767	0.53375	0.678952	no
Y71F9B.6	I:2722519-2726652	17.1716	13.4292	0.354651	0.06125	0.139802	no
Y71F9B.8	I:2735345-2742509	7.28611	8.02299	-0.138993	0.5455	0.688589	no
plk-2	I:2755624-2758205	66.8657	77.042	-0.204379	0.104	0.209181	no
Y71F9B.9	I:2759023-2761041	4.91315	9.68821	-0.979582	0.0007	0.00378201	yes
sop-3	I:2761172-2776104	32.3641	47.4412	-0.551744	0.0004	0.00232501	yes
Y71F9B.13	I:2776370-2778697	15.8318	15.9401	-0.00983164	0.96865	0.982292	no
Y71F9B.14	I:2780850-2782772	0.447493	0.26607	0.750062	1	1	no
Y71F9B.15	I:2783048-2784272	0.331949	0.0279971	3.56761	1	1	no
W03D8.9	I:2784629-2786069	20.0745	6.21101	1.69246	5e-05	0.000377672	yes
W03D8.1	I:2787855-2790310	0.859466	0.289992	1.56743	0.0036	0.0146675	yes
W03D8.2	I:2798213-2800941	1.27362	1.16613	0.127203	0.68435	0.797546	no
W03D8.3	I:2820869-2822086	4.91465	1.30026	1.91829	0.0016	0.00753036	yes
pop-1	I:2823468-2830294	21.6195	18.1553	0.251942	0.16285	0.292466	no
W10C8.3	I:2832872-2833254	0	0	0	1	1	no
W10C8.4	I:2851963-2853856	11.5107	7.55195	0.608051	0.03715	0.0950273	no
W10C8.5	I:2853970-2855735	13.2032	20.6529	-0.645459	0.0007	0.00378201	yes
W10C8.6	I:2858617-2859839	54.6267	93.2239	-0.771093	0.0095	0.0320739	yes
Y71F9AL.12	I:2871257-2875290	36.2613	33.3185	0.122109	0.4728	0.628074	no
rpl-1	I:2875395-2876313	3187.65	3193.99	-0.00286917	0.9878	0.992955	no
Y71F9AL.14	I:2880921-2883455	76.1319	86.2953	-0.180781	0.28835	0.444852	no
arx-1	I:2883546-2893719	58.9722	58.4244	0.0134627	0.9219	0.954277	no
Y71F9AL.17	I:2895328-2900861	63.6498	61.6465	0.0461388	0.7148	0.817695	no
pme-1	I:2903596-2924716	59.7238	67.5518	-0.177688	0.1711	0.303113	no
Y71F9AM.8	I:2931461-2947153	0	0.197793	#VALUE!	1	1	no
bam-2	I:2949609-2957877	7.37854	8.78803	-0.252204	0.1493	0.274858	no
Y71F9AR.4	I:2981735-2983073	54.237	52.4419	0.0485565	0.8436	0.904658	no
Y71F9AR.2	I:2983263-2985168	3.54489	2.70165	0.3919	0.25135	0.402479	no
Y71F9AR.3	I:2986187-2995914	20.2984	22.3882	-0.141373	0.34125	0.501509	no
nduf-5	I:3001380-3002850	335.53	382.379	-0.188561	0.14995	0.275561	no
mek-2	I:3003545-3013449	47.85	51.2782	-0.0998269	0.52795	0.673944	no
Y54E10BR.5	I:3021649-3031093	225.222	205.554	0.131831	0.4342	0.59214	no
rpb-7	I:3031212-3032939	144.673	138.69	0.0609386	0.6501	0.772053	no
mod-5	I:3035238-3047795	1.71551	1.38573	0.307994	0.33245	0.493471	no
ztf-23	I:3052052-3059166	40.6189	40.5206	0.0034943	0.98055	0.988828	no
arx-7	I:3059251-3070141	82.1219	90.9433	-0.147201	0.49	0.642916	no
M01B12.4	I:3070976-3084877	53.721	59.4697	-0.146668	0.24465	0.395034	no
M01B12.5	I:3085013-3096276	39.5214	71.7591	-0.860527	5e-05	0.000377672	yes
C45E1.4	I:3113018-3117626	12.5461	11.4406	0.133086	0.61625	0.745763	no
K09H9.8	I:3138539-3140571	20.505	13.4163	0.611983	0.02115	0.061179	no
K09H9.5	I:3141705-3143176	12.0663	10.0236	0.267587	0.3607	0.519976	no
lpd-6	I:3144428-3147794	86.2463	90.2403	-0.0653089	0.6037	0.73473	no
K09H9.7	I:3150409-3151980	21.9913	25.5553	-0.21669	0.27575	0.430587	no
vbh-1	I:3158514-3162377	81.5529	108.089	-0.406411	0.00175	0.00808811	yes
Y54E10A.10	I:3173243-3176322	70.8351	87.633	-0.307009	0.02785	0.0761698	no
Y54E10A.11	I:3176422-3192731	24.1742	27.2629	-0.173469	0.1829	0.319102	no
Y54E10A.12	I:3193533-3198832	43.1515	48.5929	-0.171336	0.20765	0.350996	no
Y54E10A.13	I:3199540-3203230	0	0.016236	#VALUE!	1	1	no
rom-5	I:3211046-3222951	31.3698	34.6213	-0.142283	0.5432	0.686417	no
cdt-1	I:3223154-3228023	25.3888	25.2648	0.00706348	0.9597	0.977397	no
Y54E10A.16	I:3233391-3255566	31.1977	34.8989	-0.161742	0.454	0.610977	no
zip-4	I:3264259-3266763	79.802	90.3749	-0.179498	0.19185	0.33034	no
pqn-72	I:3269477-3280884	3.26868	2.68418	0.284227	0.33385	0.494691	no
W01B11.6	I:3293168-3294359	118.77	89.9786	0.400522	0.03485	0.0904351	no
ace-2	I:3301516-3307466	6.84219	7.69109	-0.168731	0.4012	0.559921	no
Y44E3A.3	I:3317976-3318585	135.868	131.055	0.0520335	0.7588	0.848373	no
Y44E3A.4	I:3320921-3330674	15.4121	16.5702	-0.104526	0.56295	0.702844	no
Y44E3A.6	I:3340221-3349901	35.4644	37.4002	-0.0766756	0.56155	0.701494	no
W05F2.2	I:3363820-3365858	0.996606	1.21517	-0.286063	0.4181	0.576923	no
W05F2.3	I:3367650-3368553	489.967	529.203	-0.111136	0.3767	0.535607	no
W05F2.4	I:3374790-3402865	7.91096	8.06079	-0.027069	0.8875	0.932526	no
sep-1	I:3433157-3438544	45.076	51.6387	-0.196094	0.11885	0.231612	no
Y47G6A.13	I:3439108-3447705	2.73637	1.44446	0.921739	0.3374	0.498322	no
Y47G6A.14	I:3462272-3477972	28.0889	34.7905	-0.308694	0.1707	0.302648	no
Y47G6A.15	I:3462272-3477972	6.83238	1.00016	2.77215	0.06795	0.151789	no
Y47G6A.17	I:3487862-3499708	0.47303	0.832034	-0.814711	0.0145	0.0453206	yes
Y47G6A.18	I:3508501-3512737	43.4557	44.9511	-0.0488104	0.7315	0.82941	no
carboxypeptidase	I:3516479-3529958	23.1615	9.67242	1.25978	0.00585	0.0217526	yes
Y47G6A.30	I:3516479-3529958	0.959609	1.23266	-0.361256	0.80635	0.879587	no
rnp-6	I:3539569-3546906	76.8839	89.9169	-0.225912	0.11635	0.228183	no
Y47G6A.21	I:3547092-3559811	29.4988	31.9448	-0.114922	0.6731	0.78981	no
Y47G6A.22	I:3559930-3562853	63.6085	68.6557	-0.110159	0.4714	0.626947	no
Y47G6A.29,lpd-3	I:3564065-3600679	17.5905	24.2254	-0.461726	0.01415	0.0444249	yes
mis-12	I:3604522-3605759	89.298	82.0857	0.121498	0.42595	0.584302	no
Y47G6A.25	I:3606412-3608347	60.7976	57.85	0.0716994	0.6012	0.732671	no
Y47G6A.26	I:3618949-3619699	8.42112	1.51628	2.47347	5e-05	0.000377672	yes
T28F2.4	I:3631091-3636487	9.34478	6.55094	0.512459	0.0758	0.165299	no
ccb-1	I:3641674-3647011	10.6115	8.27966	0.357979	0.0701	0.155577	no
col-50	I:3651297-3652601	0.00889569	0.405852	-5.5117	1	1	no
T28F2.7	I:3655633-3661047	3.73495	5.11381	-0.453309	0.06645	0.14937	no
smp-2	I:3667125-3671702	7.05196	8.02637	-0.186723	0.38255	0.541097	no
ftn-2	I:3680179-3680946	453.519	427.183	0.0863114	0.49425	0.645963	no
rab-8	I:3682874-3684120	135.147	164.721	-0.285499	0.02465	0.0691609	no
phospholipase	I:3690182-3694016	2.61047	1.64336	0.667664	0.0412	0.103177	no
msh-2	I:3694310-3697551	51.5365	56.9274	-0.14353	0.2593	0.411701	no
F21A9.2	I:3706098-3708742	2.14342	2.98542	-0.478022	0.1314	0.249783	no
lin-59	I:3713518-3721159	16.3984	16.4146	-0.0014235	0.9916	0.994763	no
larp-5	I:3731353-3740481	91.6419	97.2976	-0.0863968	0.508	0.656692	no
inx-13	I:3748536-3753960	53.2356	23.1406	1.20196	5e-05	0.000377672	yes
inx-12	I:3755471-3759075	63.3668	31.1656	1.02377	5e-05	0.000377672	yes
ric-19	I:3778133-3781660	5.13585	9.93321	-0.951658	0.00025	0.00155458	yes
ptr-2	I:3789320-3792799	102.761	101.26	0.0212329	0.87025	0.921374	no
C32E8.9	I:3794557-3798055	37.6821	64.0448	-0.765201	5e-05	0.000377672	yes
unc-11	I:3799125-3805720	30.8988	35.8104	-0.212828	0.1523	0.279081	no
C32E8.11	I:3807474-3816798	23.08	30.1815	-0.387022	0.0025	0.010879	yes
F53F10.1	I:3830940-3837767	8.28757	15.5875	-0.911365	0.3838	0.542517	no
gsp-4	I:3838238-3839675	15.2899	4.82584	1.66372	5e-05	0.000377672	yes
T03F1.6	I:3839877-3841541	3.8051	7.1347	-0.906918	0.0015	0.00714924	yes
T03F1.7	I:3853836-3859294	27.89	41.343	-0.567895	0.02475	0.0693531	no
T03F1.8,hcp-4	I:3859400-3865940	149.437	138.376	0.11094	0.49895	0.649406	no
clec-53	I:3871475-3873418	9.21971	5.65132	0.706132	0.01135	0.0371242	yes
T03F1.12	I:3876046-3876706	75.4359	85.7698	-0.185217	0.2754	0.430128	no
abf-2	I:3881829-3888315	5.68059	8.22441	-0.533871	0.7557	0.846386	no
abf-1	I:3881829-3888315	2.92663	1.43134	1.03188	0.5052	0.65406	no
C50F2.4	I:3889130-3891520	11.1258	7.65837	0.5388	0.08205	0.175501	no
C50F2.5	I:3895793-3897402	0.738416	0.150742	2.29235	0.0035	0.0143473	yes
fkb-5	I:3898047-3899842	57.3846	14.3176	2.00288	5e-05	0.000377672	yes
C50F2.7	I:3900408-3901352	11.9337	15.7951	-0.404436	0.146	0.270268	no
C50F2.8	I:3901433-3905202	3.31194	3.80185	-0.199025	0.48565	0.639332	no
T20F5.3	I:3908748-3910544	40.5485	45.9813	-0.181399	0.6527	0.774423	no
T20F5.8	I:3911454-3912473	0.400626	0.245227	0.708137	1	1	no
T20F5.4	I:3912657-3915460	2.65033	7.8038	-1.558	5e-05	0.000377672	yes
T20F5.5	I:3918437-3919175	7.55061	4.47921	0.75335	0.0182	0.0544023	no
T20F5.6	I:3920178-3925173	48.4671	49.4824	-0.0299109	0.8164	0.886713	no
T20F5.7	I:3925838-3927889	71.6981	83.5055	-0.219936	0.1319	0.250579	no
lrp-2	I:3935282-3953944	3.69374	4.15233	-0.16884	0.22985	0.376943	no
F47B3.5	I:3963116-3964179	0	0	0	1	1	no
F47B3.6	I:3965739-3967077	0	0	0	1	1	no
F47B3.7	I:3968165-3970012	4.58571	1.08758	2.07603	5e-05	0.000377672	yes
F28H1.4	I:3974128-3977220	3.48238	2.5059	0.474744	0.16715	0.298173	no
F28H1.5	I:3978494-3979526	5.16403	1.76103	1.55207	0.00495	0.0189785	yes
unc-73	I:3999349-4031628	26.0979	23.6441	0.14245	0.37455	0.534145	no
clec-89	I:4035893-4090875	1.99324	2.34412	-0.233933	0.8798	0.927576	no
E01A2.4	I:4129567-4132293	109.578	104.943	0.0623502	0.62175	0.749124	no
E01A2.5	I:4135330-4137069	35.9593	39.7833	-0.1458	0.4522	0.609459	no
E01A2.6	I:4137169-4138953	299.289	289.789	0.0465355	0.70255	0.810232	no
E01A2.9	I:4137169-4138953	0	0	0	1	1	no
E01A2.7	I:4139514-4144584	5.25909	4.47526	0.232841	0.69275	0.803083	no
E01A2.10	I:4145325-4147137	6.08502	7.04159	-0.210639	0.43425	0.592156	no
E01A2.8	I:4147245-4148256	0.635055	0.182941	1.7955	0.09555	0.196075	no
R12E2.15	I:4148870-4149430	63.309	44.2312	0.517345	0.08325	0.177354	no
R12E2.6	I:4151208-4151747	0	0	0	1	1	no
R12E2.7	I:4153957-4154443	54.2297	24.5493	1.1434	5e-05	0.000377672	yes
R12E2.8	I:4155594-4158699	2.0997	2.56133	-0.286713	0.43865	0.596256	no
inx-15	I:4159016-4161114	30.4153	44.0815	-0.535373	0.00135	0.00656426	yes
egg-5	I:4168987-4171590	20.594	19.3278	0.0915458	0.5525	0.694354	no
R12E2.11	I:4172464-4173625	105.423	122.315	-0.214415	0.0962	0.197173	no
R12E2.12	I:4173767-4174775	87.7059	102.24	-0.221209	0.1253	0.240712	no
R12E2.13	I:4177310-4178450	142.707	151.227	-0.0836658	0.52915	0.675029	no
hop-1	I:4208593-4210342	57.6436	77.4905	-0.426859	0.0023	0.0101433	yes
C18E3.9	I:4214297-4215754	68.28	67.4303	0.0180661	0.8925	0.935663	no
ndx-7	I:4239089-4242730	44.9717	52.4723	-0.222537	0.15625	0.284391	no
exoc-7	I:4242821-4247581	38.277	48.7779	-0.349752	0.00845	0.0291746	yes
C43E11.9	I:4267205-4267970	103.163	91.0178	0.180712	0.2323	0.380233	no
cdc-6	I:4268073-4270288	77.6737	90.4078	-0.219021	0.0833	0.177362	no
Y47D9A.4	I:4273914-4274743	0.898992	0	#NAME?	0.00335	0.0138133	yes
Y47D9A.5	I:4277686-4279623	0.500535	0.134879	1.8918	1	1	no
ZK973.8	I:4364910-4366996	4.63986	2.30927	1.00664	0.0013	0.00635523	yes
ZK973.9	I:4368089-4372137	74.1954	74.6479	-0.00877324	0.97	0.982866	no
lpd-5	I:4372255-4373021	289.025	297.176	-0.0401234	0.7504	0.842901	no
thioredoxin	I:4373663-4381899	61.7242	72.0201	-0.222564	0.26785	0.421411	no
T21E12.5	I:4409692-4419306	1.70743	0.451555	1.91885	0.0935	0.192819	no
C41D11.3	I:4428466-4431917	49.6197	45.3501	0.129806	0.32485	0.485369	no
C41D11.4	I:4441646-4444106	15.6782	16.8493	-0.103927	0.623	0.749985	no
cps-6	I:4446593-4448464	70.4375	142.283	-1.01434	5e-05	0.000377672	yes
C41D11.9	I:4448728-4449775	33.0006	37.5018	-0.184469	0.3832	0.541818	no
C41D11.5	I:4449939-4450926	154.192	181.669	-0.236578	0.06575	0.148055	no
C41D11.7	I:4451199-4456806	33.417	34.2326	-0.0347909	0.8039	0.877847	no
C41D11.6	I:4460146-4462705	1.04658	1.60381	-0.615824	0.0418	0.104425	no
Y119C1B.4	I:4508600-4511127	77.0591	72.1371	0.0952245	0.4781	0.63269	no
Y119C1B.5	I:4511440-4516084	18.1958	17.4598	0.059566	0.7066	0.812292	no
Y119C1B.6	I:4517391-4518466	22.0693	36.0219	-0.706832	0.0617	0.140662	no
tag-332	I:4526395-4534799	43.3559	42.0944	0.0425981	0.74215	0.837541	no
Y119C1B.9	I:4537832-4539708	11.6744	42.1599	-1.85252	5e-05	0.000377672	yes
Y119C1B.11	I:4552851-4553122	0.77885	0	#NAME?	1	1	no
Y119C1B.10	I:4555402-4556812	24.5034	16.8733	0.538239	0.0114	0.0372482	yes
ceh-17	I:4568962-4570028	1.41765	0.78254	0.857265	0.06765	0.151185	no
col-52	I:4571214-4572889	0.0479011	0.0141382	1.76046	1	1	no
D1007.3	I:4575789-4577201	1.1856	0.900154	0.397377	0.37685	0.535607	no
D1007.18	I:4578818-4579687	35.9994	22.5985	0.671746	0.0916	0.190122	no
D1007.4	I:4580022-4580585	57.3424	69.4463	-0.276296	0.13965	0.26153	no
D1007.5	I:4580692-4583815	63.2361	64.8416	-0.0361698	0.7844	0.865012	no
rps-10	I:4583878-4584513	3954.65	3878.72	0.0279696	0.8681	0.920046	no
D1007.19	I:4589600-4589900	7.51799	9.92995	-0.401438	0.34195	0.502298	no
nrd-1	I:4597940-4602667	40.2283	40.7113	-0.0172195	0.894	0.93647	no
C44E4.1	I:4605655-4622973	48.804	54.0833	-0.148184	0.37495	0.534518	no
C44E4.7	I:4623460-4629468	1.15457	2.27663	-0.979543	0.001	0.00510063	yes
C44E4.2	I:4631391-4633348	0.770613	1.45424	-0.916186	0.02875	0.0780632	no
acbp-1	I:4635743-4637329	942.579	753.05	0.323869	0.01105	0.0363125	yes
aminotransferase	I:4637464-4640883	90.6779	122.611	-0.43526	0.00065	0.00356182	yes
Y119C1A.1	I:4641407-4644056	69.8463	84.8345	-0.280468	0.0438	0.108455	no
rpl-4	I:4645641-4646966	2413.5	2404.29	0.00551838	0.97825	0.987672	no
B0041.9	I:4645641-4646966	0	0	0	1	1	no
B0041.5	I:4648277-4650771	101.085	121.073	-0.260312	0.03845	0.0977199	no
ptps-1	I:4652186-4652907	29.5732	16.355	0.854557	0.0028	0.0119715	yes
xnp-1	I:4664871-4671739	28.4481	32.8881	-0.209235	0.09695	0.198473	no
T04D1.5	I:4684376-4684400	0	0	0	1	1	no
tag-192	I:4685873-4698576	10.064	9.59874	0.0682944	0.6103	0.740656	no
gsp-3	I:4709317-4710709	19.2926	4.61274	2.06435	5e-05	0.000377672	yes
W09C3.7	I:4714320-4715486	41.4857	53.9743	-0.379658	0.0203	0.0594004	no
W09C3.8	I:4716059-4717442	1.88476	0.723362	1.38159	0.00545	0.0205378	yes
C10H11.8	I:4735756-4737785	37.0577	54.3642	-0.552885	0.0002	0.00127822	yes
let-502	I:4738170-4744322	36.4169	45.4802	-0.320634	0.0105	0.0347646	yes
kca-1	I:4759818-4761324	144.253	163.336	-0.179242	0.1558	0.28374	no
M04F3.3	I:4763241-4765141	1.32273	2.13135	-0.688256	0.04625	0.112996	no
M04F3.4	I:4771841-4773025	61.9038	88.0084	-0.507613	0.00625	0.0229355	yes
M04F3.5	I:4773818-4777718	36.3444	40.836	-0.168107	0.2083	0.351824	no
zig-7	I:4790411-4792502	413.751	411.041	0.00947982	0.9378	0.963692	no
F57C9.7	I:4825169-4826634	22.163	21.7171	0.0293236	0.8679	0.919961	no
C01F4.2	I:4848989-4867826	2.37248	0.942746	1.33145	0.05875	0.135683	no
glc-2	I:4884903-4895496	6.67026	4.16998	0.677703	0.0523	0.124002	no
unc-38	I:4897691-4900978	2.76086	2.53604	0.122539	0.6899	0.801405	no
F21F3.6	I:4906823-4914050	191.598	239.726	-0.323305	0.029	0.0786312	no
imb-1	I:4920772-4926234	48.7044	42.4785	0.19732	0.1163	0.228114	no
F28B3.10	I:4949341-4950413	111.629	88.6083	0.333197	0.03195	0.0845325	no
F28B3.6	I:4950581-4951484	105.949	92.9196	0.18931	0.20315	0.345017	no
him-1	I:4951574-4957670	96.88	89.1911	0.119299	0.67835	0.793673	no
W03G9.8	I:4957776-4958310	247.311	265.009	-0.0997116	0.47785	0.632414	no
app-1	I:4964674-4967086	135.035	132.082	0.0319053	0.79955	0.874957	no
W03G9.5	I:4968007-4970246	0.933287	0.20482	2.18797	0.00025	0.00155458	yes
paf-1	I:4984760-4986697	1.29906	0.533779	1.28316	0.0073	0.0259243	yes
W03G9.7	I:4986954-4989405	0.760335	0.802862	-0.0785166	0.84545	0.905885	no
dyf-1	I:4989568-4994708	1.40689	1.48076	-0.0738273	0.8222	0.890948	no
F54C1.8	I:5003450-5006012	5.36469	1.83347	1.54892	0.1482	0.27329	no
F54C1.6	I:5014350-5016260	0.377818	0.454777	-0.267469	1	1	no
pat-10	I:5018769-5020166	1203.52	1118.8	0.105308	0.45275	0.609934	no
C46H11.7	I:5042194-5043055	2.46929	2.92102	-0.242374	0.52945	0.675244	no
phat-1	I:5044297-5045723	2.09595	2.65181	-0.339369	0.35225	0.512252	no
phat-2	I:5046398-5048021	10.3621	15.6955	-0.599034	0.0198	0.0582137	no
C46H11.10	I:5052538-5054886	10.0658	10.6186	-0.0771407	0.76815	0.854363	no
fhod-1	I:5058253-5068832	6.00101	8.14177	-0.440136	0.0094	0.03182	yes
vha-16	I:5079917-5082284	271.1	207.854	0.383254	0.0024	0.0105151	yes
tag-300	I:5101755-5103404	9.25879	8.57721	0.110315	0.6113	0.741636	no
chp-1	I:5103633-5104915	87.7641	86.4462	0.021829	0.8698	0.921088	no
pas-3	I:5105112-5106207	382.345	424.864	-0.152129	0.2224	0.368055	no
Y110A7A.15,Y110A7A.21	I:5107845-5113755	67.4538	87.4527	-0.374605	0.1685	0.299817	no
elpc-1	I:5114121-5118855	27.363	28.0441	-0.0354705	0.78625	0.866233	no
mat-1	I:5119225-5127205	76.5565	81.6692	-0.0932675	0.58375	0.719543	no
ppw-2	I:5158517-5162207	37.9146	46.9597	-0.30867	0.015	0.0465716	yes
Y110A7A.19	I:5162605-5164889	54.4994	63.2844	-0.215609	0.0907	0.188737	no
spd-5	I:5165159-5175525	96.8356	94.524	0.0348568	0.8219	0.890685	no
osr-1	I:5200260-5203430	2.52182	0.811197	1.63634	0.0001	0.000701046	yes
sem-2	I:5204554-5215221	7.35948	5.14905	0.515297	0.0241	0.0678401	no
C32E12.4	I:5230565-5241917	4.37994	9.03474	-1.04457	5e-05	0.000377672	yes
B0261.5	I:5245745-5263427	2.2624	0.538135	2.07181	0.17975	0.314925	no
B0261.6	I:5245745-5263427	28.0488	11.0574	1.34292	0.258	0.41035	no
B0261.7	I:5269555-5270937	215.099	242.618	-0.173684	0.16725	0.298282	no
B0261.8	I:5271330-5272040	26.8842	34.0048	-0.33898	0.1178	0.230236	no
C01G8.1	I:5272849-5274325	378.752	378.687	0.00024747	0.9986	0.998909	no
cln-3.2	I:5274698-5278711	15.9708	23.0551	-0.529649	0.004	0.0159637	yes
dhs-1	I:5278814-5281519	83.2456	107.489	-0.368746	0.00535	0.0202501	yes
dnj-4	I:5282105-5283944	42.6376	58.8101	-0.463937	0.0033	0.0136914	yes
erm-1	I:5284064-5291608	141.507	125.983	0.167645	0.1838	0.320201	no
C01G8.6	I:5298780-5300334	46.9413	61.5882	-0.391796	0.00555	0.020828	yes
let-526	I:5300983-5310917	45.8925	50.5872	-0.140515	0.3436	0.503953	no
F48C1.4	I:5313346-5313726	1.13679	1.47756	-0.378249	0.5847	0.720138	no
F48C1.5	I:5317639-5318113	90.7181	109.726	-0.274445	0.1593	0.288105	no
F48C1.6	I:5318227-5319299	67.6557	75.1033	-0.150666	0.30355	0.461646	no
spe-11	I:5330645-5332178	13.1036	3.06835	2.09443	5e-05	0.000377672	yes
F48C1.9	I:5332251-5332763	0.646696	0.803476	-0.313167	1	1	no
F48C1.8	I:5333918-5337958	0.424884	0.728999	-0.778847	0.0964	0.197504	no
apm-1	I:5342182-5344727	28.4659	35.1362	-0.303721	0.04475	0.110082	no
F55A12.8	I:5349655-5353770	27.6066	39.238	-0.507238	0.0001	0.000701046	yes
F55A12.10	I:5367012-5367832	54.053	86.6217	-0.680354	0.0002	0.00127822	yes
pqn-44	I:5372857-5384511	46.1669	65.1461	-0.496821	0.00025	0.00155458	yes
C24A11.5	I:5384641-5385740	0	0	0	1	1	no
C24A11.6	I:5396271-5396506	0	0	0	1	1	no
frm-4	I:5402897-5408347	51.9645	77.3651	-0.574156	5e-05	0.000377672	yes
coq-1	I:5412846-5415632	50.9382	43.0613	0.242357	0.08165	0.174718	no
C30H7.2	I:5416652-5420734	86.6171	106.384	-0.296555	0.01945	0.0574368	no
F27C1.6	I:5421316-5428451	54.4555	58.031	-0.0917452	0.48075	0.635052	no
atp-3	I:5428545-5429911	928.994	1119.02	-0.268498	0.0562	0.131091	no
dpy-5	I:5432160-5433059	166.313	0.323577	9.00558	5e-05	0.000377672	yes
F27C1.10,F27C1.11	I:5433909-5443029	1.83698	1.70162	0.110431	0.887	0.932318	no
F27C1.13	I:5443880-5446858	0.123616	0.0704978	0.810215	1	1	no
ferl-1	I:5455732-5459526	0.0529073	0.00710744	2.89606	1	1	no
hil-8	I:5465943-5469630	0.650017	0.385763	0.752762	0.3251	0.485602	no
helicase	I:5472323-5479441	41.4637	46.0335	-0.150834	0.24525	0.395754	no
C09D4.4	I:5479552-5484646	42.1334	45.4607	-0.109656	0.3926	0.550963	no
rpl-19	I:5484780-5486357	3223.43	3203.32	0.00903191	0.9585	0.976821	no
C09D4.6	I:5486489-5487153	0.0459751	0.0322766	0.510366	1	1	no
F59A3.3	I:5497780-5507026	56.2962	47.476	0.24584	0.2164	0.361543	no
F59A3.4	I:5507125-5509172	121.886	125.591	-0.0431931	0.7278	0.826858	no
F59A3.5,F59A3.6	I:5509409-5511692	3.4765	2.44359	0.508637	0.08285	0.176746	no
F59A3.7	I:5517295-5518566	0.943047	0.609314	0.630145	0.21925	0.364845	no
F59A3.8	I:5520391-5529761	2.05794	0.66066	1.63922	0.09055	0.188527	no
pup-3	I:5530685-5533713	9.78989	10.0455	-0.0371896	0.87515	0.924403	no
F59A3.10	I:5542632-5543337	0	0	0	1	1	no
M01A10.3	I:5546229-5561645	200.926	185.834	0.112646	0.43235	0.590453	no
pqn-52	I:5566356-5570082	204.871	247.692	-0.273831	0.05625	0.131168	no
cey-3	I:5571789-5572976	845.094	823.541	0.0372712	0.78915	0.868138	no
klp-15	I:5577057-5579302	104.936	113.093	-0.107999	0.39115	0.549529	no
tag-163	I:5582104-5597335	18.4016	16.3553	0.170073	0.4492	0.606385	no
tag-83	I:5601806-5603630	1.18212	0.593385	0.994337	0.0435	0.107833	no
F46F11.11	I:5604877-5607520	0	0	0	1	1	no
ubl-5	I:5607826-5608844	161.385	135.571	0.251452	0.18075	0.316282	no
vha-10	I:5609312-5610279	571.563	359.251	0.66992	5e-05	0.000377672	yes
F46F11.9	I:5610381-5616405	19.9045	19.0306	0.064778	0.6337	0.758128	no
F46F11.12	I:5610381-5616405	5.48364	0	#NAME?	1	1	no
F46F11.6	I:5616601-5618554	119.474	144.458	-0.273949	0.0317	0.0840732	no
F46F11.10	I:5623146-5624478	22.0564	16.3442	0.432417	0.03185	0.0843694	no
F46F11.8	I:5624604-5626291	93.7316	91.2832	0.038187	0.7663	0.853235	no
F55F8.2	I:5646394-5649659	40.7291	57.6462	-0.501166	0.00015	0.00100493	yes
F55F8.3	I:5649758-5653642	25.764	30.6815	-0.252014	0.06275	0.142529	no
cir-1	I:5653830-5655862	83.713	78.3915	0.0947559	0.4551	0.612137	no
F55F8.6,tag-345	I:5655951-5658715	62.7765	83.8398	-0.417412	0.0019	0.00866699	yes
F55F8.7	I:5659134-5661215	1.79285	0.424407	2.07874	5e-05	0.000377672	yes
F55F8.8	I:5667150-5668840	0.836281	0.580859	0.525802	0.31105	0.469853	no
F55F8.9	I:5669970-5673355	49.2267	44.4286	0.14795	0.269	0.422703	no
unc-40	I:5678634-5691506	34.4897	34.843	-0.0147026	0.92285	0.954799	no
C04F1.1	I:5726386-5729310	2.60585	0.98157	1.40859	0.001	0.00510063	yes
F56H1.3	I:5729795-5735845	0.409162	0.0668213	2.61429	1	1	no
rpt-5	I:5741870-5743576	200.294	218.12	-0.123	0.3284	0.488919	no
F56H1.5	I:5754347-5760796	32.9789	37.8845	-0.200067	0.1204	0.233864	no
F56H1.7	I:5760899-5762438	274.541	318.491	-0.214233	0.089	0.186332	no
cpb-3	I:5788637-5791755	77.3276	82.8753	-0.0999591	0.42435	0.582746	no
glh-3	I:5792326-5795117	24.3724	33.7495	-0.46962	0.00075	0.00400858	yes
mtk-1	I:5795406-5801289	29.1798	32.5171	-0.156229	0.2215	0.367039	no
B0414.8	I:5803955-5807294	55.7932	60.7941	-0.123842	0.3372	0.498218	no
C32F10.4	I:5807711-5815640	28.1591	178.894	-2.66743	5e-05	0.000377672	yes
hmg-3	I:5815675-5818128	88.432	110.177	-0.317184	0.01225	0.0395641	yes
nhr-2	I:5818488-5821111	14.8592	10.2534	0.535253	0.0068	0.0245102	yes
C32F10.8	I:5822843-5826158	154.656	199.401	-0.366615	0.0027	0.0116311	yes
F33D11.5	I:5834646-5837395	0.736403	0.933688	-0.342446	0.43695	0.59447	no
F33D11.6	I:5844838-5846469	0.022777	0	#NAME?	1	1	no
F33D11.7	I:5850082-5851831	1.9012	0.543904	1.80549	0.00115	0.00574776	yes
F33D11.8	I:5854303-5855050	31.0922	31.1636	-0.00330526	0.9935	0.995762	no
F33D11.9	I:5857551-5862560	136.187	183.558	-0.430644	0.0008	0.00423906	yes
F33D11.12	I:5862666-5866434	74.7925	77.1514	-0.0447996	0.7301	0.828659	no
F33D11.10	I:5866565-5868146	138.076	147.658	-0.0967963	0.43775	0.5954	no
vpr-1	I:5868281-5869957	206.451	216.729	-0.0700952	0.5752	0.712595	no
noah-1	I:5874424-5878957	29.5626	9.68849	1.60943	5e-05	0.000377672	yes
stam-1	I:5898305-5904692	102.252	113.795	-0.15431	0.3147	0.474297	no
B0207.6	I:5935538-5936946	77.0289	84.2749	-0.129703	0.3709	0.530413	no
B0207.7	I:5945758-5947344	2.23989	0.34979	2.67887	5e-05	0.000377672	yes
B0207.8	I:5951137-5951744	0	0	0	1	1	no
B0207.9	I:5957484-5958361	5.48432	2.05806	1.41403	0.0063	0.0230805	yes
B0207.10	I:5959027-5959528	2.43452	3.50691	-0.526564	0.4294	0.587779	no
B0207.11	I:5963034-5964128	2.76235	0.543221	2.34629	0.0001	0.000701046	yes
avr-14	I:5967246-5973322	8.44111	5.14382	0.714594	0.00975	0.0327244	yes
C06A5.4	I:5980792-5981590	2.32788	2.51347	-0.11066	0.7693	0.855086	no
C06A5.5	I:5981817-5982454	0.15145	0.0594008	1.35029	1	1	no
C06A5.10	I:5982520-5982971	0	0	0	1	1	no
C06A5.6	I:5983231-5985871	47.0151	39.1587	0.263789	0.0444	0.109518	no
unc-94	I:5992671-6001101	69.1094	84.3409	-0.287351	0.02385	0.0673209	no
C06A5.12	I:6004709-6004925	18.7956	19.2992	-0.0381455	0.93325	0.960541	no
C06A5.8	I:6008106-6009608	52.2891	76.773	-0.554087	0.0002	0.00127822	yes
rnf-1	I:6009782-6011525	55.5895	67.3946	-0.277821	0.0391	0.0989476	no
ceh-2	I:6046951-6050389	2.84565	2.01131	0.500623	0.2088	0.352321	no
C27A12.6	I:6053343-6055823	37.6045	43.1739	-0.199255	0.1324	0.251281	no
C27A12.7	I:6055948-6058426	53.6877	58.9004	-0.133687	0.30405	0.462224	no
ari-1	I:6058550-6061035	56.8703	57.7614	-0.0224305	0.861	0.915471	no
C27A12.9	I:6061781-6068034	19.6548	27.0095	-0.458583	0.01005	0.0335123	yes
ZK484.3	I:6068527-6070126	91.9079	99.0669	-0.108213	0.40445	0.563284	no
ZK484.4	I:6070680-6078849	52.7624	61.8403	-0.229037	0.0665	0.14946	no
ZK484.9	I:6081813-6085964	0	0	0	1	1	no
ZK484.5	I:6087370-6087766	239.577	66.4851	1.84939	5e-05	0.000377672	yes
ZK484.6	I:6090076-6090897	2.8957	1.61004	0.846815	0.0271	0.0745952	no
ZK484.7	I:6095132-6096518	3.27865	1.0908	1.58771	5e-05	0.000377672	yes
nspd-1	I:6097497-6097839	205.734	62.7409	1.7133	5e-05	0.000377672	yes
T27A3.5	I:6100381-6101683	5.96213	1.07001	2.4782	5e-05	0.000377672	yes
T27A3.9	I:6105680-6105756	0	0	0	1	1	no
T27A3.6	I:6105864-6107717	41.8728	44.8894	-0.100363	0.50725	0.655943	no
T27A3.7	I:6107834-6109657	52.3193	67.9705	-0.377565	0.00485	0.0186601	yes
abt-6	I:6139217-6140446	0.0194934	0.0245301	-0.331565	1	1	no
T09B4.6	I:6154076-6159124	1.48413	1.80472	-0.282163	0.88045	0.927902	no
T09B4.7	I:6160081-6161667	1.72861	0.717017	1.26953	0.00295	0.0125018	yes
T09B4.12	I:6162307-6162329	0	0	0	1	1	no
aminotransferase	I:6164720-6166541	48.0978	24.9715	0.94569	5e-05	0.000377672	yes
T09B4.11	I:6172678-6172699	0	0	0	1	1	no
T09B4.9	I:6177984-6180842	75.3039	68.0078	0.147025	0.26325	0.416214	no
chn-1	I:6181315-6183882	118.294	136.617	-0.207761	0.10165	0.205527	no
T05E7.4	I:6188160-6194898	3.87393	4.22763	-0.126052	0.93795	0.963782	no
T05E7.5	I:6200796-6202348	13.2118	6.09818	1.11537	5e-05	0.000377672	yes
T08B2.7	I:6206956-6211157	125.555	143.342	-0.191135	0.12465	0.240001	no
T08B2.8	I:6211270-6211887	108.381	100.545	0.108266	0.48055	0.634896	no
frs-1	I:6211987-6214588	113.142	104.271	0.117794	0.34885	0.50904	no
T08B2.13	I:6211987-6214588	0	0	0	1	1	no
rps-17	I:6220091-6220766	4086.71	4163.94	-0.0270098	0.86385	0.917245	no
T08B2.11	I:6221246-6223117	12.6366	19.1725	-0.601424	0.00305	0.012876	yes
T08B2.12	I:6231499-6232120	3.632	1.44347	1.33123	0.0027	0.0116311	yes
spp-15	I:6239541-6250069	126.216	304.841	-1.27216	5e-05	0.000377672	yes
oac-9	I:6265692-6269035	1.79343	0.512994	1.80571	5e-05	0.000377672	yes
twk-37	I:6269562-6271050	0.419013	0.0510173	3.03794	1	1	no
ATPase	I:6271982-6273770	32.5593	9.1757	1.82718	5e-05	0.000377672	yes
C10G11.9	I:6274576-6275270	4.31246	1.16396	1.88947	0.0007	0.00378201	yes
C10G11.10	I:6305033-6306357	1.17407	0.788264	0.574766	0.2616	0.41445	no
[truncated: 18,278 more rows]
